# Supplementary material for: Hypoxia-Related Signature Is a Prognostic Biomarker of Pancreatic Cancer
Source: PubMed Central journal article supplement (PMC9250441; doi:10.1155/2022/6449997), 2022-06-25
Supplement: 6449997.f1.pdf [file 6449997.f1.pdf]

HALLMARK\_HYPOXIA

> Genes up-regulated in response to low oxygen levels (hypoxia).

ACKR3

ADM

ADORA2B

AK4

AKAP12

ALDOA

ALDOB

ALDOC

AMPD3

ANGPTL4

ANKZF1

ANXA2

ATF3

ATP7A

B3GALT6

B4GALNT2

BCAN

BCL2

BGN

BHLHE40

BNIP3L

BRS3

BTG1

CA12

CASP6

CAV1

CAVIN1

CAVIN3

CCN1

CCN2

CCN5

CCNG2

CDKN1A

CDKN1B

CDKN1C

CHST2

CHST3

CITED2

COL5A1

CP

CSRP2

CXCR4

DCN

DDIT3

DDIT4

DPYSL4  
DTNA  
DUSP1  
EDN2  
EFNA1  
EFNA3  
EGFR  
ENO1  
ENO2  
ENO3  
ER01A  
ERRFI1  
ETS1  
EXT1  
F3  
FAM162A  
FBP1  
FOS  
FOSL2  
FOXO3  
GAA  
GALK1  
GAPDH  
GAPDHS  
GBE1  
GCK  
GCNT2  
GLRX  
GPC1  
GPC3  
GPC4  
GPI  
GRHPR  
GYS1  
HAS1  
HDLBP  
HEXA  
HK1  
HK2  
HMOX1  
HOXB9  
HS3ST1  
HSPA5  
IDS  
IER3  
IGFBP1  
IGFBP3

IL6  
ILVBL  
INHA  
IRS2  
ISG20  
JMJD6  
JUN  
KDEL3  
KDEL3  
KDM3A  
KIF5A  
KLF6  
KLF7  
KLHL24  
LALBA  
LARGE1  
LDHA  
LDHC  
LOX  
LXN  
MAFF  
MAP3K1  
MIF  
MT1E  
MT2A  
MXI1  
MYH9  
NAGK  
NCAN  
NDRG1  
NDST1  
NDST2  
NEDD4L  
NFIL3  
NOCT  
NR3C1  
P4HA1  
P4HA2  
PAM  
PCK1  
PDGFB  
PDK1  
PDK3  
PFKFB3  
PFKL  
PFKP  
PGAM2  
PGF

PGK1  
PGM1  
PGM2  
PHKG1  
PIM1  
PKLR  
PKP1  
PLAC8  
PLAUR  
PLIN2  
PNRC1  
PPARGC1A  
PPFIA4  
PPP1R15A  
PPP1R3C  
PRDX5  
PRKCA  
PYGM  
RBPJ  
RORA  
RRAGD  
S100A4  
SAP30  
SCARB1  
SDC2  
SDC3  
SDC4  
SELENBP1  
SERPINE1  
SIAH2  
SLC25A1  
SLC2A1  
SLC2A3  
SLC2A5  
SLC37A4  
SLC6A6  
SRPX  
STBD1  
STC1  
STC2  
SULT2B1  
TES  
TGFB3  
TGFB1  
TGM2  
TIPARP  
TKTL1

TMEM45A  
TNFAIP3  
TPBG  
TPD52  
TPI1  
TPST2  
UGP2  
VEGFA  
VHL  
VLDLR  
WSB1  
XPNPEP1  
ZFP36  
ZNF292

| Symbol     | Mean. Tumor | Mean. Normal | Log2FC | adj. pval |
|------------|-------------|--------------|--------|-----------|
| A2M        | 183.787     | 28.3         | 2.657  | 4.39E-74  |
| A4GALT     | 17.14       | 2.2          | 2.503  | 5.80E-72  |
| ABCG1      | 16.66       | 1.21         | 2.998  | 5.46E-113 |
| ABHD11-AS1 | 10.2        | 1.07         | 2.436  | 9.64E-55  |
| ABHD17C    | 35.111      | 2.48         | 3.375  | 8.09E-110 |
| ABI2       | 15.47       | 3.1          | 2.006  | 1.90E-89  |
| ABI3       | 10.11       | 1.39         | 2.217  | 9.18E-70  |
| ABLIM3     | 15.77       | 1.15         | 2.963  | 6.07E-96  |
| ABR        | 41.92       | 9.11         | 2.086  | 1.35E-81  |
| ABRACL     | 45.351      | 5.66         | 2.799  | 1.73E-95  |
| AC005152   | 0.32        | 4.91         | -2.163 | 4.87E-61  |
| AC005255   | 5.78        | 0            | 2.761  | 1.23E-97  |
| AC005339   | 5.63        | 0.47         | 2.173  | 2.33E-81  |
| AC005786   | 8.19        | 0.26         | 2.867  | 4.28E-48  |
| AC005943   | 4.19        | 0            | 2.376  | 2.47E-29  |
| AC005943   | 5.18        | 0            | 2.628  | 1.74E-18  |
| AC005944   | 19.401      | 2.32         | 2.619  | 1.28E-61  |
| AC007283   | 5.52        | 0            | 2.705  | 2.17E-101 |
| AC009065   | 3.66        | 0            | 2.22   | 6.42E-118 |
| AC011298   | 0.16        | 15.39        | -3.821 | 1.58E-124 |
| AC011558   | 104.27      | 13.79        | 2.831  | 2.79E-56  |
| AC021066   | 129.48      | 6.07         | 4.206  | 1.03E-24  |
| AC078941   | 0.93        | 22.95        | -3.633 | 3.18E-88  |
| AC093642   | 0.73        | 12.44        | -2.958 | 8.78E-95  |
| AC093673   | 11.83       | 1.03         | 2.66   | 8.55E-108 |
| AC093850   | 5.16        | 0            | 2.623  | 1.15E-65  |
| AC131097   | 0.19        | 12.14        | -3.465 | 1.07E-88  |
| AC132217   | 28.779      | 4.74         | 2.375  | 1.33E-26  |
| AC156455   | 2.03        | 11.43        | -2.036 | 4.57E-77  |
| AC239868   | 26.06       | 0.25         | 4.436  | 2.47E-64  |
| AC239868   | 26.06       | 0.25         | 4.436  | 2.47E-64  |
| ACADL      | 0.66        | 16.959       | -3.435 | 6.15E-127 |
| ACE        | 19.311      | 1.95         | 2.783  | 3.19E-112 |
| ACOT7      | 25.189      | 3.51         | 2.538  | 6.54E-114 |
| ACP5       | 55.479      | 5.22         | 3.183  | 2.50E-75  |
| ACSL3      | 38.869      | 6.61         | 2.389  | 1.17E-108 |
| ACSL4      | 17.629      | 2.54         | 2.396  | 3.16E-91  |
| ACSL5      | 45.251      | 1.71         | 4.093  | 5.15E-106 |
| ACTA2      | 540.517     | 26.339       | 4.308  | 4.33E-91  |
| ACTB       | 4048.578    | 313.147      | 3.688  | 6.57E-103 |
| ACTG2      | 16.64       | 2.09         | 2.513  | 1.02E-42  |
| ACTN1      | 151.355     | 22.529       | 2.695  | 2.24E-88  |
| ACTN4      | 302.983     | 49.07        | 2.602  | 1.01E-86  |
| ACTR2      | 83.562      | 11.58        | 2.749  | 8.13E-107 |
| ACTR3      | 105.36      | 14.8         | 2.751  | 3.04E-90  |
| ACVR1      | 25.81       | 3.66         | 2.524  | 2.57E-105 |

|           |         |         |        |           |
|-----------|---------|---------|--------|-----------|
| ACY1      | 40.14   | 7.21    | 2.325  | 5.52E-84  |
| ADAM10    | 41.599  | 6.66    | 2.475  | 4.54E-80  |
| ADAM12    | 5.1     | 0.05    | 2.538  | 1.30E-64  |
| ADAM15    | 106.957 | 22.6    | 2.194  | 8.03E-78  |
| ADAM19    | 8.42    | 0.24    | 2.925  | 2.72E-89  |
| ADAM28    | 29.67   | 1.84    | 3.433  | 2.90E-80  |
| ADAM8     | 28.889  | 2.46    | 3.111  | 4.54E-83  |
| ADAM9     | 71.322  | 5.26    | 3.53   | 6.43E-98  |
| ADAMTS12  | 6.53    | 0.18    | 2.674  | 1.54E-80  |
| ADAMTS2   | 22.409  | 2.05    | 2.94   | 1.08E-82  |
| ADAP1     | 43.761  | 5.76    | 2.727  | 1.05E-53  |
| ADCY7     | 8.25    | 1.01    | 2.202  | 3.82E-67  |
| ADGRA2    | 17.759  | 1.7     | 2.797  | 7.77E-78  |
| ADGRE5    | 62.769  | 12.35   | 2.256  | 1.42E-71  |
| ADGRF1    | 11.63   | 0.08    | 3.548  | 2.68E-86  |
| ADGRG1    | 92.308  | 21.85   | 2.03   | 1.69E-69  |
| ADGRG6    | 8.16    | 0.79    | 2.355  | 2.57E-74  |
| ADH1C     | 20.129  | 4.16    | 2.034  | 9.98E-24  |
| ADHFE1    | 3.18    | 16.549  | -2.07  | 4.08E-86  |
| ADTRP     | 3.85    | 0.1     | 2.14   | 1.05E-67  |
| AEBP1     | 274.24  | 12.62   | 4.337  | 4.82E-94  |
| AF131216  | 0.05    | 6.32    | -2.801 | 3.46E-81  |
| AFAP1     | 13.4    | 1.19    | 2.717  | 1.10E-110 |
| AFAP1-AS1 | 4.46    | 0.02    | 2.42   | 2.87E-62  |
| AGR2      | 438.276 | 4.23    | 6.392  | 5.17E-107 |
| AGR3      | 67.878  | 1.67    | 4.689  | 9.31E-88  |
| AGT       | 16.05   | 2.23    | 2.4    | 5.36E-43  |
| AHNAK     | 87.262  | 11.45   | 2.826  | 9.16E-89  |
| AHNAK2    | 40.509  | 0.51    | 4.781  | 5.35E-103 |
| AHR       | 32.32   | 2.3     | 3.336  | 9.13E-108 |
| AIF1      | 59.218  | 3.67    | 3.689  | 4.53E-86  |
| AIG1      | 29.871  | 6.48    | 2.045  | 7.21E-103 |
| AIM1L     | 9       | 0.16    | 3.108  | 8.01E-86  |
| AK1       | 80.359  | 14.47   | 2.395  | 7.91E-95  |
| AK4       | 8.98    | 0.31    | 2.929  | 1.07E-92  |
| AKAP12    | 14.8    | 1.72    | 2.538  | 2.50E-61  |
| AKAP2     | 16.57   | 2.05    | 2.526  | 6.22E-80  |
| AKR1B10   | 22.641  | 0.24    | 4.253  | 1.33E-66  |
| AKR1C2    | 17.2    | 3.34    | 2.068  | 7.46E-38  |
| AKR1C3    | 79.688  | 14.57   | 2.374  | 1.55E-56  |
| AKR7A3    | 17.34   | 104.69  | -2.527 | 6.95E-26  |
| AL442127  | 0       | 6.32    | -2.872 | 6.42E-18  |
| AL513523  | 17.49   | 3.13    | 2.163  | 8.63E-61  |
| ALAS1     | 37.53   | 6.31    | 2.398  | 1.24E-113 |
| ALB       | 4.14    | 255.857 | -5.643 | 1.44E-86  |
| ALDH1A3   | 18.69   | 3.03    | 2.289  | 1.47E-49  |
| ALDH1B1   | 15.64   | 2.99    | 2.06   | 3.22E-80  |

|          |          |          |         |           |
|----------|----------|----------|---------|-----------|
| ALDH2    | 139.478  | 22.841   | 2.559   | 3.56E-87  |
| ALDH3A1  | 6.56     | 0.17     | 2.692   | 9.17E-59  |
| ALDH3B1  | 35.089   | 2.88     | 3.217   | 1.35E-72  |
| ALDOA    | 1162.084 | 235.763  | 2.296   | 7.44E-71  |
| ALDOC    | 15.17    | 1.67     | 2.598   | 2.75E-91  |
| ALOX5AP  | 63.579   | 4.64     | 3.517   | 1.12E-72  |
| ALYREF   | 60.732   | 11.86    | 2.263   | 1.24E-106 |
| AMICA1   | 12.89    | 0.95     | 2.833   | 9.38E-66  |
| AMIGO2   | 17.64    | 1.37     | 2.975   | 1.56E-94  |
| AMN      | 13.17    | 0.38     | 3.36    | 1.99E-66  |
| AMY2A    | 4.86     | 8429.9   | -10.491 | 2.21E-57  |
| AMY2B    | 11.68    | 1523.738 | -6.91   | 1.80E-68  |
| AMYP1    | 0.13     | 11.61    | -3.48   | 9.17E-16  |
| ANGPTL2  | 23.88    | 1.55     | 3.286   | 6.08E-94  |
| ANKH     | 53.16    | 9.39     | 2.382   | 2.68E-87  |
| ANLN     | 7.22     | 0.17     | 2.813   | 4.13E-100 |
| ANO1     | 50.251   | 1.53     | 4.34    | 5.01E-117 |
| ANP32A   | 97.342   | 20.74    | 2.177   | 1.48E-93  |
| ANP32E   | 19.74    | 3.1      | 2.339   | 8.11E-113 |
| ANPEP    | 38.289   | 306.469  | -2.968  | 8.54E-49  |
| ANTXR1   | 51.911   | 1.34     | 4.499   | 1.09E-105 |
| ANTXR2   | 44.27    | 3.62     | 3.293   | 2.60E-80  |
| ANXA1    | 250.678  | 11.12    | 4.376   | 1.24E-99  |
| ANXA10   | 55.529   | 5.31     | 3.163   | 1.12E-29  |
| ANXA11   | 270.614  | 53.319   | 2.322   | 1.59E-81  |
| ANXA13   | 5.76     | 0.08     | 2.646   | 3.62E-60  |
| ANXA2    | 1875.942 | 115.151  | 4.014   | 4.22E-98  |
| ANXA2P2  | 30.64    | 1.17     | 3.866   | 2.57E-120 |
| ANXA3    | 93.798   | 13.43    | 2.716   | 1.03E-52  |
| ANXA5    | 370.954  | 69.189   | 2.406   | 2.30E-81  |
| ANXA8    | 12.49    | 0.1      | 3.616   | 2.52E-66  |
| ANXA8L1  | 9.11     | 0.11     | 3.187   | 2.63E-62  |
| AOC1     | 32.17    | 0.1      | 4.914   | 2.12E-113 |
| AOC3     | 21.44    | 3.12     | 2.445   | 4.79E-61  |
| AOX1     | 3.92     | 33.721   | -2.819  | 5.39E-65  |
| AP000349 | 63.548   | 0.01     | 5.998   | 2.64E-105 |
| AP002518 | 109.273  | 0        | 6.785   | 1.75E-68  |
| AP003391 | 8.62     | 0        | 3.266   | 2.59E-21  |
| AP006621 | 0.54     | 11.28    | -2.995  | 8.66E-97  |
| AP1M2    | 78.738   | 18.25    | 2.05    | 5.90E-70  |
| AP1S1    | 59.962   | 11.44    | 2.293   | 6.74E-114 |
| AP1S3    | 10.13    | 0.74     | 2.677   | 1.23E-91  |
| AP2B1    | 65.298   | 12.59    | 2.286   | 1.34E-104 |
| AP2M1    | 245.962  | 51.631   | 2.23    | 3.96E-91  |
| APCDD1   | 20.26    | 4.07     | 2.068   | 7.92E-58  |
| APCS     | 17.25    | 1.37     | 2.945   | 7.04E-19  |
| APLNR    | 11.99    | 0.46     | 3.153   | 1.03E-79  |



|            |         |         |        |           |
|------------|---------|---------|--------|-----------|
| APLP2      | 251.409 | 38.321  | 2.682  | 1.12E-99  |
| APOBEC1    | 3.1     | 0       | 2.036  | 9.04E-51  |
| APOBEC3C   | 20.05   | 1.8     | 2.91   | 3.09E-101 |
| APOBEC3G   | 10.56   | 0.91    | 2.598  | 4.93E-96  |
| APOBR      | 6.16    | 0.38    | 2.375  | 3.97E-82  |
| APOC1      | 213.53  | 3.58    | 5.55   | 4.75E-94  |
| APOC2      | 6.95    | 0.16    | 2.777  | 2.72E-70  |
| APOC4-APOC | 10.69   | 0.36    | 3.104  | 8.22E-73  |
| APOE       | 220.295 | 10.01   | 4.329  | 1.34E-79  |
| APOL1      | 135.447 | 2.76    | 5.181  | 1.60E-128 |
| APOL2      | 41.81   | 6.06    | 2.6    | 3.57E-94  |
| APOL3      | 20.141  | 3.66    | 2.182  | 1.16E-66  |
| APOL6      | 8.2     | 0.8     | 2.354  | 2.95E-102 |
| APP        | 327.079 | 65.321  | 2.307  | 1.81E-83  |
| AQP12A     | 0.46    | 69.18   | -5.587 | 1.18E-111 |
| AQP12B     | 0.31    | 161.791 | -6.957 | 2.01E-125 |
| AQP5       | 37.281  | 0.48    | 4.693  | 2.38E-76  |
| AQP8       | 0.36    | 173.488 | -7.003 | 4.01E-82  |
| ARAP1-AS1  | 13.92   | 0       | 3.899  | 5.03E-67  |
| AREG       | 22.259  | 0.6     | 3.862  | 2.83E-86  |
| ARF3       | 69.84   | 14.39   | 2.203  | 1.29E-97  |
| ARF6       | 48      | 6.32    | 2.743  | 3.86E-122 |
| ARFIP1     | 21.48   | 4       | 2.169  | 4.59E-110 |
| ARHGAP1    | 67.409  | 14.13   | 2.177  | 1.62E-90  |
| ARHGAP15   | 6.06    | 0.52    | 2.216  | 1.26E-66  |
| ARHGAP23   | 13.16   | 1.42    | 2.549  | 1.41E-78  |
| ARHGAP25   | 6.29    | 0.8     | 2.018  | 3.10E-67  |
| ARHGAP26   | 13.51   | 1.61    | 2.475  | 4.63E-83  |
| ARHGAP27   | 31.871  | 4.13    | 2.68   | 2.31E-77  |
| ARHGAP30   | 7.66    | 0.77    | 2.291  | 1.19E-67  |
| ARHGDIB    | 162.883 | 10.77   | 3.799  | 2.29E-101 |
| ARHGDIG    | 1.4     | 51.239  | -4.444 | 1.53E-111 |
| ARHGEF2    | 43.501  | 5.49    | 2.778  | 1.03E-99  |
| ARID5B     | 8.27    | 1.04    | 2.184  | 8.72E-78  |
| ARL14      | 21.681  | 2.59    | 2.659  | 4.72E-45  |
| ARL15      | 11.76   | 1.83    | 2.173  | 3.07E-97  |
| ARL4A      | 21.651  | 2.55    | 2.674  | 1.59E-119 |
| ARL4C      | 34.539  | 1.67    | 3.735  | 1.90E-99  |
| ARL4D      | 7.1     | 0.77    | 2.194  | 2.74E-72  |
| ARL6IP1    | 140.088 | 17.55   | 2.927  | 2.07E-110 |
| ARL6IP5    | 100.412 | 16.99   | 2.495  | 4.08E-97  |
| ARL8A      | 47.29   | 10.71   | 2.044  | 1.16E-104 |
| ARMC9      | 10.14   | 1.77    | 2.008  | 8.86E-90  |
| ARNTL2     | 7.62    | 0.41    | 2.612  | 2.41E-101 |
| ARPC1B     | 304.584 | 24.8    | 3.566  | 2.41E-112 |
| ARPC2      | 286.799 | 41.24   | 2.768  | 5.94E-106 |
| ARPC3      | 328.829 | 67.111  | 2.276  | 1.30E-91  |

|          |          |         |        |           |
|----------|----------|---------|--------|-----------|
| ARPC4    | 132.43   | 26.67   | 2.27   | 1.85E-94  |
| ARPC5    | 155.664  | 21.091  | 2.826  | 7.95E-114 |
| ARPC5L   | 48.431   | 10.86   | 2.059  | 8.42E-103 |
| ARRDC2   | 38.869   | 6.99    | 2.319  | 6.07E-83  |
| ASAH1    | 92.25    | 21.69   | 2.039  | 2.56E-86  |
| ASAP2    | 14.5     | 1.93    | 2.403  | 6.08E-78  |
| ASF1B    | 7.33     | 0.22    | 2.771  | 2.43E-118 |
| ASPH     | 75.462   | 12.14   | 2.541  | 1.78E-85  |
| ASPHD1   | 21.739   | 3.93    | 2.206  | 2.92E-65  |
| ASPHD2   | 5.25     | 0.2     | 2.381  | 1.88E-103 |
| ASPN     | 38.361   | 1.25    | 4.129  | 2.10E-94  |
| ASS1     | 163.369  | 19.329  | 3.015  | 3.47E-92  |
| ATHL1    | 34.21    | 374.831 | -3.416 | 1.09E-59  |
| ATOX1    | 131.936  | 19.849  | 2.673  | 8.61E-120 |
| ATP1B1   | 244.043  | 37.61   | 2.666  | 2.33E-83  |
| ATP1B3   | 101.863  | 14.61   | 2.72   | 1.81E-97  |
| ATP2B4   | 33.19    | 5.52    | 2.391  | 1.05E-73  |
| ATP2C1   | 53.578   | 12.01   | 2.069  | 1.36E-86  |
| ATP2C2   | 8.62     | 0.51    | 2.672  | 4.68E-73  |
| ATP4A    | 0.01     | 3.18    | -2.049 | 2.05E-62  |
| ATP5E    | 121.548  | 16.57   | 2.802  | 2.33E-112 |
| ATP5J2   | 469.993  | 104.343 | 2.161  | 5.46E-93  |
| ATP5L    | 330.429  | 72.458  | 2.174  | 1.29E-100 |
| ATP6AP2  | 91.569   | 13.11   | 2.714  | 3.06E-115 |
| ATP6VOD1 | 90.471   | 20.75   | 2.072  | 1.53E-95  |
| ATP6VOE1 | 302.082  | 66.491  | 2.167  | 2.23E-92  |
| ATP6V1D  | 76.531   | 13.45   | 2.424  | 7.81E-113 |
| ATP6V1E1 | 108.007  | 22.59   | 2.208  | 4.01E-103 |
| ATP6V1F  | 197.17   | 33.261  | 2.532  | 4.70E-111 |
| ATP6V1G1 | 120.3    | 26.541  | 2.139  | 3.75E-96  |
| AURKA    | 6.36     | 0.43    | 2.364  | 1.17E-102 |
| AURKB    | 7.44     | 0.25    | 2.755  | 9.38E-100 |
| AVPI1    | 16.59    | 3.35    | 2.016  | 8.01E-90  |
| AXL      | 21.01    | 1.47    | 3.156  | 7.71E-92  |
| AZGP1    | 54.36    | 240.55  | -2.125 | 1.19E-31  |
| B2M      | 8387.353 | 568.217 | 3.881  | 3.82E-97  |
| B3GALT4  | 13.73    | 1.42    | 2.606  | 1.78E-124 |
| B3GNT3   | 50.92    | 1.11    | 4.621  | 9.05E-123 |
| B3GNT5   | 11.38    | 1.5     | 2.308  | 2.40E-88  |
| B3GNT9   | 9.33     | 1.14    | 2.271  | 1.45E-105 |
| B4GALNT3 | 17.65    | 1.69    | 2.794  | 2.33E-88  |
| B4GALT1  | 59.449   | 12.15   | 2.201  | 7.47E-60  |
| B4GALT4  | 35.76    | 7.01    | 2.198  | 2.69E-103 |
| B4GALT5  | 33.92    | 3.49    | 2.959  | 6.40E-107 |
| BACE2    | 99.27    | 20.3    | 2.235  | 1.62E-52  |
| BAG3     | 33.15    | 6.45    | 2.197  | 6.70E-79  |
| BAIAP2   | 38.561   | 4.24    | 2.916  | 9.37E-118 |

|          |         |         |        |           |
|----------|---------|---------|--------|-----------|
| BAIAP2L2 | 19.2    | 0.82    | 3.472  | 1.83E-85  |
| BAK1     | 25.43   | 4.5     | 2.265  | 5.51E-100 |
| BAMBI    | 10.3    | 1.79    | 2.018  | 6.31E-74  |
| BASP1    | 23.96   | 0.92    | 3.7    | 2.21E-95  |
| BATF     | 17.99   | 0.36    | 3.804  | 9.06E-114 |
| BAX      | 132.439 | 21.13   | 2.592  | 4.52E-109 |
| BCAR3    | 15.3    | 1.57    | 2.665  | 1.53E-112 |
| BCAS1    | 21.31   | 0.25    | 4.158  | 4.51E-91  |
| BCAS4    | 6.92    | 0.62    | 2.29   | 4.56E-95  |
| BCL10    | 13.92   | 1.81    | 2.409  | 3.31E-104 |
| BCL2A1   | 8.61    | 0.23    | 2.966  | 6.40E-76  |
| BCL2L1   | 116.129 | 18.88   | 2.559  | 2.96E-99  |
| BCL7C    | 31.851  | 6.18    | 2.194  | 3.21E-107 |
| BCR      | 42.83   | 7.89    | 2.302  | 2.37E-110 |
| BEGAIN   | 1.17    | 11.54   | -2.531 | 3.06E-100 |
| BGN      | 613.066 | 22.19   | 4.727  | 3.46E-103 |
| BHLHA15  | 0.81    | 117.051 | -6.027 | 2.44E-110 |
| BHLHE40  | 141.778 | 18.84   | 2.847  | 6.73E-60  |
| BHLHE41  | 20.11   | 2.34    | 2.66   | 1.35E-83  |
| BICD1    | 8.87    | 0.78    | 2.471  | 1.02E-109 |
| BID      | 33.15   | 3.43    | 2.947  | 7.38E-95  |
| BIK      | 22.36   | 0.78    | 3.714  | 3.68E-113 |
| BIRC3    | 30.099  | 2.44    | 3.176  | 9.82E-66  |
| BIRC5    | 6.61    | 0.25    | 2.606  | 2.53E-68  |
| BLACAT1  | 3.59    | 0.05    | 2.128  | 2.31E-73  |
| BLCAP    | 54.59   | 10.89   | 2.225  | 1.30E-104 |
| BLOC1S1  | 178.106 | 41.749  | 2.067  | 4.54E-97  |
| BLVRA    | 44.829  | 8.77    | 2.23   | 9.63E-102 |
| BMP1     | 24.21   | 4.78    | 2.125  | 1.33E-68  |
| BMP4     | 26.339  | 1.22    | 3.622  | 1.70E-96  |
| BMPR2    | 12.48   | 1.84    | 2.247  | 9.46E-102 |
| BNIP3    | 12.03   | 128.871 | -3.317 | 7.56E-72  |
| BNIP3L   | 36.839  | 6.17    | 2.4    | 9.72E-98  |
| BOLA2    | 14.89   | 2.22    | 2.303  | 2.63E-97  |
| BOLA2B   | 109.008 | 15.75   | 2.715  | 1.37E-115 |
| BPGM     | 15.82   | 2.89    | 2.112  | 7.04E-105 |
| BPIFB1   | 3.52    | 0.01    | 2.162  | 1.07E-38  |
| BPNT1    | 21.17   | 2.84    | 2.529  | 9.87E-121 |
| BRSK2    | 1.13    | 47.851  | -4.519 | 1.21E-119 |
| BSG      | 499.208 | 106.122 | 2.223  | 1.37E-90  |
| BST1     | 8.69    | 0.48    | 2.711  | 3.32E-68  |
| BST2     | 184.055 | 8.16    | 4.337  | 4.08E-102 |
| BTBD10   | 18.09   | 3.46    | 2.098  | 2.83E-110 |
| BTBD6    | 23.45   | 4.65    | 2.114  | 2.76E-58  |
| BTN3A3   | 12.33   | 2.22    | 2.05   | 1.82E-41  |
| BUB1     | 3.74    | 0.08    | 2.134  | 2.83E-102 |
| BUD31    | 99.511  | 21.47   | 2.161  | 8.49E-100 |

|           |         |         |        |           |
|-----------|---------|---------|--------|-----------|
| BX470102  | 4.69    | 0.09    | 2.384  | 7.30E-70  |
| BZW1      | 83.049  | 12.65   | 2.622  | 9.96E-94  |
| BZW1P2    | 11.07   | 1.5     | 2.271  | 3.86E-69  |
| C10orf54  | 47.199  | 6.11    | 2.761  | 1.67E-91  |
| C11orf98  | 78.738  | 18.67   | 2.019  | 1.76E-96  |
| C12orf49  | 16.37   | 3.29    | 2.018  | 3.33E-97  |
| C12orf75  | 92.918  | 13.32   | 2.713  | 5.29E-72  |
| C14orf119 | 52.91   | 12.41   | 2.007  | 2.33E-103 |
| C14orf80  | 11.05   | 1.83    | 2.09   | 1.05E-84  |
| C15orf48  | 104.119 | 2.46    | 4.925  | 3.31E-98  |
| C19orf33  | 483.24  | 1.9     | 7.383  | 8.56E-125 |
| C1GALT1   | 18.11   | 2.05    | 2.647  | 2.99E-103 |
| Clorf106  | 64.82   | 5.12    | 3.427  | 4.56E-68  |
| Clorf116  | 27.23   | 3.85    | 2.541  | 1.22E-81  |
| Clorf162  | 20.15   | 3.55    | 2.217  | 2.18E-51  |
| Clorf21   | 23.779  | 4.84    | 2.085  | 1.21E-72  |
| Clorf233  | 5.36    | 0.29    | 2.302  | 1.90E-101 |
| Clorf54   | 22.161  | 1.42    | 3.259  | 2.69E-107 |
| C1QA      | 182.48  | 10.28   | 4.024  | 1.99E-85  |
| C1QB      | 181.634 | 14.66   | 3.544  | 9.35E-69  |
| C1QC      | 136.711 | 10.38   | 3.597  | 7.37E-72  |
| C1QTNF1   | 33.91   | 5.2     | 2.493  | 4.66E-80  |
| C1QTNF3   | 16.549  | 2.76    | 2.223  | 1.77E-53  |
| C1QTNF5   | 87.432  | 7.27    | 3.419  | 4.00E-98  |
| C1QTNF6   | 14.37   | 2.03    | 2.343  | 4.42E-77  |
| C1R       | 261.632 | 34.881  | 2.872  | 9.31E-63  |
| C1S       | 242.139 | 35.971  | 2.717  | 5.08E-54  |
| C2        | 21.919  | 0.78    | 3.687  | 5.27E-106 |
| C20orf24  | 97.558  | 23.039  | 2.036  | 7.12E-96  |
| C2orf54   | 5.37    | 0.19    | 2.42   | 3.63E-72  |
| C3        | 887.374 | 141.778 | 2.637  | 9.40E-31  |
| C3AR1     | 8.87    | 1.08    | 2.246  | 2.39E-56  |
| C4orf3    | 86.36   | 17.27   | 2.257  | 4.24E-100 |
| C5AR1     | 9.69    | 1.63    | 2.023  | 1.55E-55  |
| C5orf15   | 47.199  | 8       | 2.421  | 3.58E-101 |
| C5orf46   | 7.05    | 0.14    | 2.82   | 2.14E-64  |
| C6orf1    | 35.631  | 7.81    | 2.056  | 2.60E-82  |
| C6orf222  | 4.31    | 0.19    | 2.158  | 2.25E-33  |
| C9orf89   | 39.151  | 6.14    | 2.491  | 1.55E-100 |
| CA4       | 1.36    | 10.45   | -2.278 | 4.67E-43  |
| CA9       | 37.07   | 1.6     | 3.872  | 9.13E-45  |
| CACNB3    | 17.881  | 1.72    | 2.795  | 3.03E-105 |
| CALB2     | 6.41    | 0.19    | 2.638  | 1.46E-60  |
| CALCRL    | 7.87    | 1.06    | 2.106  | 1.43E-66  |
| CALD1     | 125.957 | 13.64   | 3.116  | 6.85E-74  |
| CALHM2    | 20.41   | 3.23    | 2.34   | 5.02E-76  |
| CALM2     | 557.141 | 79.291  | 2.797  | 2.36E-101 |

|            |         |         |        |           |
|------------|---------|---------|--------|-----------|
| CALML4     | 34.489  | 5.13    | 2.533  | 4.20E-80  |
| CALR       | 583.989 | 120.241 | 2.271  | 9.94E-89  |
| CALU       | 78.351  | 15.42   | 2.273  | 3.28E-82  |
| CAMK2D     | 16.59   | 3.36    | 2.012  | 5.76E-83  |
| CAMK2N1    | 72.972  | 2.88    | 4.253  | 2.27E-137 |
| CAMK2N2    | 1.15    | 11.41   | -2.529 | 6.27E-61  |
| CANT1      | 40.36   | 7.73    | 2.244  | 1.17E-95  |
| CAP1       | 223.386 | 25.08   | 3.105  | 2.73E-105 |
| CAPG       | 367.092 | 15.19   | 4.507  | 9.30E-106 |
| CAPN2      | 152.81  | 28.21   | 2.397  | 8.34E-96  |
| CAPN5      | 36.79   | 2.26    | 3.535  | 2.45E-95  |
| CAPN8      | 71.169  | 1.22    | 5.023  | 8.72E-78  |
| CAPN9      | 4.91    | 0.03    | 2.521  | 2.58E-51  |
| CAPNS1     | 737.448 | 123.716 | 2.566  | 1.80E-96  |
| CAPZA2     | 69.41   | 13.69   | 2.261  | 1.55E-83  |
| CAPZB      | 302.564 | 36.921  | 3.001  | 9.97E-110 |
| CARD11     | 20.12   | 0.47    | 3.845  | 4.51E-113 |
| CARD16     | 28.34   | 1.54    | 3.53   | 9.59E-111 |
| CARD6      | 7.45    | 0.99    | 2.086  | 2.98E-47  |
| CARHSP1    | 91.81   | 19.77   | 2.16   | 4.69E-89  |
| CASC4      | 48.509  | 9.02    | 2.305  | 2.29E-92  |
| CASK       | 20.579  | 4.32    | 2.02   | 1.83E-93  |
| CASP1      | 26.679  | 2.65    | 2.923  | 4.12E-83  |
| CASP3      | 18.93   | 3.6     | 2.115  | 6.50E-104 |
| CAST       | 112.228 | 21.35   | 2.341  | 1.61E-84  |
| CAV1       | 42.261  | 5.06    | 2.836  | 1.71E-72  |
| CAV2       | 51.282  | 9.6     | 2.302  | 3.11E-57  |
| CBFB       | 29.13   | 5.96    | 2.114  | 1.08E-96  |
| CBR1       | 57.531  | 13.1    | 2.054  | 3.09E-88  |
| CBR3       | 6.37    | 0.52    | 2.278  | 3.65E-108 |
| CBS        | 0.76    | 6.14    | -2.02  | 6.38E-32  |
| CCDC109B   | 12.3    | 0.86    | 2.838  | 9.89E-115 |
| CCDC23     | 24.13   | 4.58    | 2.171  | 9.96E-106 |
| CCDC3      | 9.46    | 1.16    | 2.276  | 1.58E-71  |
| CCDC51     | 11.09   | 1.94    | 2.04   | 8.56E-125 |
| CCDC71L    | 14.65   | 2.88    | 2.012  | 1.20E-81  |
| CCDC74A    | 11.15   | 1.19    | 2.472  | 8.45E-95  |
| CCDC80     | 108.638 | 8.91    | 3.468  | 6.59E-61  |
| CCDC88B    | 26.21   | 4.42    | 2.328  | 2.69E-73  |
| CCL13      | 3.78    | 0.17    | 2.031  | 9.48E-51  |
| CCL15-CCL1 | 8.49    | 0.24    | 2.936  | 1.34E-69  |
| CCL17      | 6.5     | 0       | 2.907  | 4.38E-55  |
| CCL18      | 29.331  | 0.05    | 4.852  | 2.83E-88  |
| CCL19      | 26.629  | 0.44    | 4.262  | 2.16E-50  |
| CCL20      | 19.02   | 0.3     | 3.945  | 2.97E-76  |
| CCL21      | 38.751  | 3.36    | 3.189  | 3.69E-38  |
| CCL24      | 4.49    | 0       | 2.457  | 7.32E-55  |

|          |          |         |       |           |
|----------|----------|---------|-------|-----------|
| CCL3     | 6.61     | 0.3     | 2.549 | 4.85E-68  |
| CCL4     | 7.51     | 0.72    | 2.307 | 9.29E-61  |
| CCL4L2   | 5.3      | 0.17    | 2.429 | 2.91E-61  |
| CCL5     | 22.88    | 1.1     | 3.507 | 1.11E-87  |
| CCNA2    | 5.14     | 0.36    | 2.175 | 1.67E-96  |
| CCNB1    | 19.68    | 1.54    | 3.025 | 2.50E-119 |
| CCNB2    | 8.88     | 0.23    | 3.006 | 1.08E-108 |
| CCND1    | 56.68    | 10.99   | 2.266 | 5.13E-83  |
| CCND3    | 64.35    | 11.98   | 2.332 | 1.87E-87  |
| CCRL2    | 6.31     | 0.48    | 2.304 | 1.22E-88  |
| CD109    | 4.49     | 0.15    | 2.255 | 2.56E-83  |
| CD14     | 56.398   | 5.93    | 3.05  | 2.44E-80  |
| CD163L1  | 4.25     | 0.26    | 2.059 | 2.01E-70  |
| CD2      | 7.05     | 0.42    | 2.503 | 2.49E-67  |
| CD248    | 42.789   | 3.72    | 3.214 | 4.64E-75  |
| CD27     | 5        | 0.28    | 2.229 | 3.29E-57  |
| CD276    | 82.452   | 11.4    | 2.751 | 1.36E-100 |
| CD300A   | 11.79    | 0.69    | 2.92  | 6.72E-86  |
| CD300LF  | 3.79     | 0.16    | 2.046 | 2.51E-67  |
| CD37     | 26.42    | 2.76    | 2.866 | 6.35E-59  |
| CD3D     | 9.89     | 0.41    | 2.949 | 6.08E-74  |
| CD3E     | 11.78    | 0.71    | 2.902 | 3.91E-67  |
| CD4      | 23.11    | 2.05    | 2.983 | 6.81E-78  |
| CD47     | 90.917   | 16.02   | 2.433 | 3.71E-88  |
| CD48     | 12.25    | 0.57    | 3.077 | 8.68E-67  |
| CD52     | 76.968   | 1.88    | 4.759 | 5.37E-89  |
| CD53     | 38.39    | 3.09    | 3.268 | 2.86E-66  |
| CD55     | 103.042  | 5.82    | 3.931 | 6.80E-109 |
| CD58     | 23.92    | 2.4     | 2.874 | 4.06E-99  |
| CD59     | 442.826  | 72.67   | 2.591 | 6.61E-94  |
| CD63     | 1573.868 | 349.051 | 2.17  | 1.78E-80  |
| CD68     | 144.958  | 4.89    | 4.631 | 3.57E-102 |
| CD7      | 5.64     | 0.41    | 2.236 | 2.61E-70  |
| CD74     | 2261.712 | 99.477  | 4.493 | 4.13E-98  |
| CD79A    | 6.81     | 0.2     | 2.702 | 6.09E-47  |
| CD82     | 97.51    | 10.61   | 3.085 | 9.68E-111 |
| CD83     | 6.43     | 0.63    | 2.188 | 3.04E-73  |
| CD86     | 6.24     | 0.28    | 2.5   | 4.21E-76  |
| CD9      | 252.807  | 33.62   | 2.874 | 1.10E-85  |
| CD93     | 16.99    | 2.58    | 2.329 | 5.04E-72  |
| CDA      | 18.71    | 0.38    | 3.836 | 7.52E-91  |
| CDC20    | 15.07    | 0.22    | 3.719 | 1.04E-113 |
| CDC42    | 155.05   | 27.87   | 2.434 | 4.77E-98  |
| CDC42EP2 | 16.5     | 1.87    | 2.608 | 3.84E-103 |
| CDC42EP3 | 18.01    | 2.61    | 2.397 | 3.17E-88  |
| CDC42EP5 | 75.583   | 5.23    | 3.62  | 2.46E-95  |
| CDCA3    | 6.93     | 0.69    | 2.23  | 6.05E-94  |

|           |         |           |         |           |
|-----------|---------|-----------|---------|-----------|
| CDCA5     | 5.98    | 0.23      | 2.505   | 1.54E-110 |
| CDCA7     | 8.01    | 0.62      | 2.476   | 5.91E-61  |
| CDCA8     | 5.46    | 0.29      | 2.324   | 8.97E-104 |
| CDCP1     | 22.02   | 2.65      | 2.657   | 5.72E-92  |
| CDH11     | 35.309  | 0.89      | 4.264   | 4.86E-95  |
| CDH13     | 3.82    | 0.19      | 2.018   | 1.04E-83  |
| CDH17     | 6.6     | 0.08      | 2.815   | 4.59E-50  |
| CDH3      | 50.882  | 0.42      | 5.191   | 1.15E-109 |
| CDHR2     | 13.65   | 0.1       | 3.735   | 2.60E-83  |
| CDHR5     | 9.46    | 0.65      | 2.664   | 1.68E-62  |
| CDK1      | 12.16   | 0.33      | 3.307   | 4.62E-122 |
| CDK2AP1   | 119.543 | 18.03     | 2.663   | 1.34E-110 |
| CDK5      | 15.66   | 2.95      | 2.076   | 1.50E-113 |
| CDKN2A    | 6.73    | 0.5       | 2.365   | 2.69E-45  |
| CDKN2B    | 11.16   | 0.53      | 2.991   | 5.31E-79  |
| CDKN2D    | 13.7    | 2.05      | 2.269   | 1.41E-101 |
| CDKN3     | 10.02   | 0.33      | 3.051   | 1.89E-123 |
| CDR2L     | 19.129  | 1.36      | 3.092   | 3.26E-110 |
| CDS1      | 10.13   | 1.55      | 2.126   | 1.74E-94  |
| CDT1      | 3.97    | 0.22      | 2.026   | 5.43E-90  |
| CEACAM1   | 25.41   | 0.89      | 3.805   | 6.73E-115 |
| CEACAM5   | 134.279 | 0.07      | 6.982   | 1.64E-84  |
| CEACAM6   | 518.14  | 1.59      | 7.647   | 7.91E-111 |
| CEACAM7   | 10.76   | 0.56      | 2.914   | 1.20E-43  |
| CEBPB     | 58.969  | 12.16     | 2.188   | 8.01E-65  |
| CECR1     | 17.579  | 2.96      | 2.23    | 1.36E-51  |
| CEL       | 19.291  | 12250.049 | -9.238  | 2.78E-70  |
| CELA2A    | 4.53    | 10247.61  | -10.856 | 2.71E-61  |
| CELA2B    | 2       | 1188.23   | -8.631  | 4.63E-57  |
| CELA3A    | 47.431  | 32225.161 | -9.378  | 1.01E-60  |
| CELA3B    | 8.97    | 13424.678 | -10.395 | 1.29E-70  |
| CELP      | 0.18    | 187.415   | -7.319  | 3.40E-94  |
| CELSR1    | 10.59   | 0.49      | 2.96    | 1.74E-101 |
| CEMIP     | 9.75    | 0.33      | 3.015   | 1.72E-84  |
| CENPF     | 10.69   | 0.13      | 3.371   | 1.55E-89  |
| CENPK     | 4.08    | 0.26      | 2.011   | 2.05E-94  |
| CENPM     | 8.82    | 0.26      | 2.962   | 6.97E-91  |
| CENPU     | 6.73    | 0.67      | 2.211   | 3.02E-93  |
| CENPW     | 12.83   | 0.73      | 2.999   | 1.98E-117 |
| CEP170    | 14.44   | 1.88      | 2.423   | 6.20E-90  |
| CEP55     | 5.54    | 0.06      | 2.625   | 1.35E-107 |
| CERCAM    | 53.94   | 9.42      | 2.398   | 2.07E-68  |
| CERS6     | 12.12   | 1.56      | 2.358   | 9.26E-100 |
| CERS6-AS1 | 22.389  | 2.91      | 2.581   | 1.73E-83  |
| CES1      | 28.929  | 3.97      | 2.59    | 1.42E-47  |
| CETN2     | 45.781  | 8.5       | 2.3     | 1.36E-111 |
| CFB       | 130.598 | 21.97     | 2.518   | 1.40E-39  |

|            |          |           |         |           |
|------------|----------|-----------|---------|-----------|
| CFH        | 51.349   | 3.49      | 3.543   | 4.90E-88  |
| CFI        | 58.169   | 13.36     | 2.043   | 2.56E-42  |
| CFL1       | 1120.633 | 94.398    | 3.555   | 6.50E-117 |
| CGB5       | 3.74     | 0         | 2.245   | 2.44E-34  |
| CGREF1     | 7.55     | 0.71      | 2.322   | 2.21E-85  |
| CH17-360DE | 5.41     | 0.03      | 2.638   | 6.13E-77  |
| CHAD       | 0.6      | 8.93      | -2.634  | 3.89E-85  |
| CHIC2      | 19.95    | 3.67      | 2.165   | 2.78E-110 |
| CHIT1      | 5.46     | 0.13      | 2.515   | 1.45E-42  |
| CHMP1B     | 32.61    | 6.37      | 2.189   | 3.25E-101 |
| CHMP4B     | 174.03   | 30.399    | 2.479   | 8.98E-110 |
| CHMP5      | 62.469   | 12.85     | 2.196   | 2.64E-100 |
| CHN1       | 10.87    | 1.42      | 2.294   | 4.62E-81  |
| CHST11     | 11.08    | 1.24      | 2.431   | 6.43E-69  |
| CHST14     | 17.12    | 3         | 2.18    | 4.74E-102 |
| CHST4      | 10.51    | 1.74      | 2.071   | 1.22E-36  |
| CHSY1      | 15.54    | 2.05      | 2.439   | 2.07E-90  |
| CIDEC      | 5.06     | 0.49      | 2.024   | 1.76E-27  |
| CIITA      | 7.1      | 0.88      | 2.107   | 1.63E-54  |
| CKAP2      | 5.71     | 0.59      | 2.077   | 3.72E-109 |
| CKLF       | 91.113   | 7.03      | 3.52    | 6.53E-129 |
| CKMT1A     | 19.99    | 1.7       | 2.959   | 1.51E-87  |
| CKMT1B     | 20.06    | 1.58      | 3.029   | 2.30E-90  |
| CKS1B      | 71.848   | 8.32      | 2.966   | 1.62E-112 |
| CKS1BP3    | 5.69     | 0         | 2.742   | 9.88E-95  |
| CKS2       | 38.569   | 1.47      | 4.002   | 2.43E-134 |
| CLCF1      | 11.9     | 2.19      | 2.016   | 6.73E-56  |
| CLDN11     | 7.1      | 0.48      | 2.452   | 2.38E-69  |
| CLDN18     | 60.429   | 0.12      | 5.777   | 1.06E-62  |
| CLDN2      | 39.829   | 2.29      | 3.633   | 3.04E-44  |
| CLDN23     | 10.29    | 1.32      | 2.283   | 1.65E-62  |
| CLDN4      | 279.75   | 41.671    | 2.718   | 1.48E-53  |
| CLEC11A    | 26.099   | 2.47      | 2.965   | 2.16E-91  |
| CLEC2B     | 10.32    | 0.97      | 2.523   | 2.87E-81  |
| CLIC1      | 596.632  | 55.422    | 3.405   | 4.79E-113 |
| CLIC3      | 24.421   | 0.3       | 4.289   | 4.33E-83  |
| CLIC4      | 49.428   | 9.56      | 2.256   | 2.21E-64  |
| CLIP3      | 9.21     | 1.23      | 2.195   | 2.25E-72  |
| CLPS       | 20.97    | 38160.699 | -10.762 | 3.75E-70  |
| CLPSL1     | 0.11     | 44.6      | -5.36   | 9.46E-38  |
| CLRN3      | 8.07     | 0.05      | 3.111   | 6.96E-75  |
| CLTB       | 208.976  | 26.29     | 2.944   | 2.38E-103 |
| CLTC       | 115.824  | 23.94     | 2.228   | 1.17E-104 |
| CMIP       | 39.069   | 5.83      | 2.553   | 9.31E-97  |
| CMTM3      | 56.759   | 2.42      | 4.078   | 4.85E-106 |
| CMTM6      | 43.17    | 6.12      | 2.633   | 8.22E-104 |
| CMTM7      | 50.07    | 8.25      | 2.465   | 7.78E-74  |



|          |          |           |         |           |
|----------|----------|-----------|---------|-----------|
| CNIH1    | 81.007   | 18.15     | 2.098   | 6.33E-93  |
| CNIH4    | 42.25    | 7.45      | 2.356   | 2.83E-102 |
| CNN1     | 28.689   | 2.22      | 3.205   | 7.61E-64  |
| CNN2     | 131.433  | 26.779    | 2.253   | 1.08E-58  |
| CNP      | 49.48    | 11.34     | 2.032   | 1.64E-101 |
| CNPY4    | 14.96    | 1.94      | 2.441   | 6.41E-101 |
| CNTN1    | 5.76     | 0.57      | 2.106   | 8.85E-55  |
| COA6     | 32.421   | 6.83      | 2.094   | 1.92E-115 |
| COCH     | 1.47     | 9.69      | -2.114  | 2.90E-40  |
| COL10A1  | 78.569   | 0.07      | 6.217   | 1.93E-101 |
| COL11A1  | 30.6     | 0.13      | 4.806   | 2.08E-77  |
| COL12A1  | 52.189   | 1.94      | 4.177   | 3.98E-95  |
| COL14A1  | 25.91    | 1.56      | 3.394   | 1.17E-72  |
| COL15A1  | 30.879   | 5.37      | 2.323   | 6.65E-57  |
| COL16A1  | 62.081   | 4.77      | 3.451   | 1.09E-90  |
| COL17A1  | 62.141   | 0.08      | 5.869   | 2.46E-91  |
| COL1A1   | 1201.648 | 12.61     | 6.465   | 2.17E-111 |
| COL1A2   | 1166.361 | 18.25     | 5.922   | 5.25E-111 |
| COL22A1  | 4.49     | 0.1       | 2.319   | 6.39E-66  |
| COL3A1   | 1103.062 | 13.04     | 6.297   | 3.23E-110 |
| COL4A1   | 129.624  | 9.91      | 3.582   | 2.54E-90  |
| COL4A2   | 163.516  | 13.06     | 3.549   | 6.46E-95  |
| COL5A1   | 115.936  | 2.59      | 5.026   | 2.06E-105 |
| COL5A2   | 71.61    | 1.71      | 4.744   | 1.55E-108 |
| COL6A1   | 179.955  | 35.779    | 2.299   | 2.74E-50  |
| COL6A2   | 277.798  | 30.049    | 3.167   | 2.09E-70  |
| COL6A3   | 188.118  | 12.97     | 3.759   | 3.89E-61  |
| COL7A1   | 19.26    | 0.83      | 3.469   | 7.19E-74  |
| COL8A1   | 25.989   | 0.34      | 4.332   | 1.50E-96  |
| COL8A2   | 9.66     | 0.25      | 3.092   | 1.44E-86  |
| COL9A2   | 7.89     | 0.9       | 2.226   | 1.54E-62  |
| COLGALT1 | 50.509   | 11.31     | 2.065   | 1.31E-76  |
| COMP     | 69.888   | 0.75      | 5.34    | 2.68E-93  |
| COMT     | 144.867  | 33.481    | 2.081   | 7.82E-84  |
| COPS8    | 39.871   | 8.03      | 2.178   | 2.97E-97  |
| COR01A   | 33.55    | 3.72      | 2.872   | 3.01E-65  |
| COR01C   | 38.66    | 5.31      | 2.652   | 1.51E-97  |
| COR02A   | 12.61    | 0.12      | 3.603   | 1.87E-120 |
| COTL1    | 161.892  | 9.41      | 3.968   | 6.31E-119 |
| COX6B1   | 346.785  | 80.37     | 2.096   | 7.35E-92  |
| COX6B2   | 3.69     | 0.09      | 2.105   | 2.20E-49  |
| COX7A1   | 52.138   | 10.15     | 2.253   | 2.72E-70  |
| COX7A2   | 280.507  | 65.018    | 2.092   | 3.03E-96  |
| COX7B    | 121.237  | 21.67     | 2.431   | 4.44E-115 |
| CP       | 21.591   | 1.23      | 3.341   | 1.57E-36  |
| CPA1     | 28.45    | 34590.781 | -10.198 | 7.40E-64  |
| CPA2     | 11.04    | 6821.625  | -9.146  | 5.91E-66  |

|            |         |          |        |           |
|------------|---------|----------|--------|-----------|
| CPA4       | 0.39    | 6.09     | -2.351 | 1.76E-77  |
| CPB1       | 40.419  | 15875.34 | -8.582 | 4.26E-54  |
| CPD        | 22.32   | 4.43     | 2.103  | 1.72E-90  |
| CPNE2      | 23.769  | 5.06     | 2.031  | 3.38E-78  |
| CPNE7      | 5.43    | 0.54     | 2.062  | 2.45E-67  |
| CPPED1     | 8.69    | 1.14     | 2.179  | 1.28E-99  |
| CPT1C      | 8.26    | 1.21     | 2.067  | 4.92E-64  |
| CPVL       | 31.89   | 2.51     | 3.228  | 6.04E-79  |
| CPXM1      | 17.19   | 0.76     | 3.37   | 3.88E-75  |
| CPXM2      | 11.19   | 0.94     | 2.652  | 2.26E-74  |
| CPZ        | 16.979  | 0.39     | 3.693  | 7.48E-110 |
| CRABP2     | 50.369  | 0.87     | 4.78   | 7.16E-92  |
| CRIM1      | 19.99   | 3.68     | 2.165  | 9.83E-79  |
| CRIP1      | 528.074 | 5.46     | 6.356  | 1.40E-142 |
| CRIP2      | 193.702 | 22.68    | 3.04   | 3.43E-85  |
| CRISP3     | 15.401  | 0.35     | 3.603  | 2.61E-31  |
| CRISPLD2   | 47.629  | 6.81     | 2.638  | 4.40E-62  |
| CRNKL1     | 18.17   | 3.7      | 2.028  | 1.27E-118 |
| CRP        | 35.429  | 3.59     | 2.989  | 1.33E-08  |
| CRTAP      | 104.538 | 19.87    | 2.338  | 1.51E-80  |
| CSDC2      | 1.79    | 15.56    | -2.569 | 6.13E-52  |
| CSF1R      | 18.1    | 2.26     | 2.551  | 8.93E-56  |
| CSF2RA     | 8.73    | 0.47     | 2.727  | 1.07E-77  |
| CSK        | 46.381  | 8.11     | 2.379  | 2.22E-92  |
| CSNK1A1    | 86.677  | 18.17    | 2.193  | 6.54E-94  |
| CSR1P1     | 184.745 | 43.679   | 2.056  | 3.66E-74  |
| CST1       | 100.092 | 0        | 6.66   | 1.18E-98  |
| CST2       | 22.15   | 0.05     | 4.463  | 2.12E-84  |
| CST6       | 12.58   | 0.2      | 3.5    | 1.28E-61  |
| CST7       | 8.68    | 0.52     | 2.671  | 9.73E-77  |
| CSTA       | 15.5    | 0.99     | 3.052  | 6.40E-69  |
| CSTB       | 122.479 | 12.59    | 3.184  | 3.07E-107 |
| CTB-191K22 | 39.191  | 1.57     | 3.967  | 3.66E-97  |
| CTB-193M12 | 6.38    | 0.45     | 2.348  | 3.56E-113 |
| CTB-31020  | 7.17    | 0        | 3.03   | 9.21E-56  |
| CTB-50L17  | 0.18    | 6.56     | -2.68  | 8.93E-125 |
| CTC-425F1  | 9.59    | 1.01     | 2.397  | 2.60E-32  |
| CTD-2008P7 | 0.23    | 9.98     | -3.158 | 4.27E-127 |
| CTD-2227E1 | 1.4     | 15.41    | -2.773 | 1.81E-84  |
| CTD-2231E1 | 36.78   | 7.56     | 2.142  | 3.00E-113 |
| CTD-2377D2 | 7.4     | 0        | 3.07   | 7.10E-48  |
| CTD-3252C9 | 18.539  | 2.64     | 2.424  | 1.26E-54  |
| CTDSPL     | 24      | 4.74     | 2.123  | 2.14E-96  |
| CTGF       | 172.804 | 25.029   | 2.739  | 1.57E-50  |
| CTHRC1     | 109.303 | 0.89     | 5.867  | 2.75E-117 |
| CTNNA1     | 196.678 | 40.63    | 2.247  | 3.08E-86  |
| CTNNB1     | 155.319 | 29.84    | 2.342  | 1.62E-93  |

|           |         |           |        |           |
|-----------|---------|-----------|--------|-----------|
| CTNNBL1   | 49.09   | 8.77      | 2.358  | 5.45E-120 |
| CTRB1     | 63.941  | 28700.733 | -8.788 | 1.94E-57  |
| CTRB2     | 92.027  | 29919.531 | -8.329 | 3.62E-55  |
| CTRC      | 18.83   | 8000.641  | -8.657 | 5.62E-59  |
| CTRL      | 1.63    | 931.943   | -8.471 | 1.80E-72  |
| CTSA      | 166.883 | 30.92     | 2.395  | 5.65E-95  |
| CTSB      | 658.664 | 58.012    | 3.483  | 1.10E-105 |
| CTSC      | 149.935 | 14.76     | 3.26   | 3.20E-103 |
| CTSD      | 819.442 | 129.238   | 2.655  | 6.29E-87  |
| CTSE      | 321.393 | 0.6       | 7.655  | 1.96E-105 |
| CTSH      | 338.543 | 43.98     | 2.916  | 1.01E-75  |
| CTSK      | 122.683 | 3.46      | 4.793  | 6.34E-101 |
| CTSL      | 115.407 | 26.319    | 2.091  | 5.09E-66  |
| CTS0      | 22.721  | 4.54      | 2.098  | 2.30E-76  |
| CTSS      | 137.472 | 4.72      | 4.597  | 3.11E-104 |
| CTSZ      | 280.468 | 32.34     | 3.078  | 1.15E-98  |
| CTTNBP2NL | 10.86   | 1.19      | 2.437  | 3.54E-102 |
| CTXN1     | 5.5     | 0.61      | 2.013  | 3.33E-61  |
| CUZD1     | 1.83    | 866.946   | -8.261 | 1.05E-83  |
| CX3CL1    | 24      | 3.83      | 2.372  | 6.46E-65  |
| CXCL10    | 6.13    | 0.13      | 2.658  | 1.47E-57  |
| CXCL13    | 3.45    | 0.07      | 2.056  | 1.62E-34  |
| CXCL14    | 88.401  | 3.05      | 4.464  | 3.23E-73  |
| CXCL16    | 93.538  | 6.72      | 3.614  | 1.79E-119 |
| CXCL3     | 6.73    | 0.68      | 2.202  | 1.09E-44  |
| CXCL5     | 25.43   | 0.07      | 4.626  | 2.47E-70  |
| CXCL6     | 7.41    | 0.95      | 2.109  | 1.45E-23  |
| CXCL8     | 23.72   | 1.02      | 3.613  | 2.27E-48  |
| CXCL9     | 4.9     | 0.09      | 2.436  | 1.27E-54  |
| CXCR4     | 60.652  | 2.27      | 4.237  | 1.18E-93  |
| CXCR5     | 5.69    | 0.64      | 2.028  | 1.17E-69  |
| CYB5B     | 68.171  | 10.51     | 2.587  | 7.02E-113 |
| CYB5R2    | 11.3    | 1.56      | 2.264  | 1.44E-90  |
| CYB5R3    | 178.501 | 31.999    | 2.444  | 4.28E-93  |
| CYBA      | 378.696 | 38.529    | 3.264  | 1.13E-76  |
| CYBB      | 12.17   | 1.13      | 2.628  | 2.72E-58  |
| CYBRD1    | 44.901  | 4.56      | 3.045  | 2.14E-75  |
| CYCS      | 60.812  | 11.45     | 2.312  | 1.95E-99  |
| CYGB      | 24.62   | 4.31      | 2.27   | 5.70E-69  |
| CYP1B1    | 11.77   | 0.84      | 2.795  | 3.90E-57  |
| CYP27A1   | 27.14   | 3.07      | 2.79   | 2.10E-91  |
| CYP2C18   | 7.6     | 0.04      | 3.048  | 5.05E-76  |
| CYP2S1    | 23.4    | 0.18      | 4.37   | 1.67E-92  |
| CYP4F12   | 8.44    | 0.69      | 2.482  | 4.22E-60  |
| CYP4F3    | 3.59    | 0.1       | 2.061  | 2.38E-64  |
| CYR61     | 93.909  | 21.28     | 2.091  | 8.14E-31  |
| CYSTM1    | 240.834 | 29.38     | 2.993  | 4.08E-96  |

|           |         |         |        |           |
|-----------|---------|---------|--------|-----------|
| CYTIP     | 7.62    | 1.09    | 2.044  | 9.97E-57  |
| DACT1     | 9.57    | 0.65    | 2.679  | 1.19E-78  |
| DACT3     | 4.37    | 0.33    | 2.014  | 1.87E-74  |
| DAPP1     | 7.2     | 0.12    | 2.872  | 9.85E-94  |
| DBI       | 242.795 | 48.19   | 2.309  | 2.45E-95  |
| DBN1      | 49.428  | 6.71    | 2.709  | 3.81E-93  |
| DBNDD2    | 71.54   | 14.87   | 2.193  | 2.85E-91  |
| DBNL      | 87.729  | 18.34   | 2.198  | 5.67E-100 |
| DCBLD2    | 13.34   | 2.21    | 2.159  | 2.10E-62  |
| DCK       | 10.59   | 1.82    | 2.039  | 2.21E-90  |
| DCN       | 473.722 | 53.382  | 3.126  | 2.03E-60  |
| DCTPP1    | 43.98   | 9.37    | 2.117  | 3.03E-98  |
| DDA1      | 43.989  | 7.82    | 2.351  | 3.55E-108 |
| DDAH2     | 81.599  | 8.69    | 3.092  | 3.85E-99  |
| DDR2      | 8.17    | 0.95    | 2.233  | 5.78E-64  |
| DDX60     | 14.85   | 1.34    | 2.76   | 7.93E-97  |
| DEGS1     | 35.55   | 7.43    | 2.116  | 5.15E-97  |
| DENND2D   | 30.71   | 6.84    | 2.016  | 5.27E-76  |
| DEPTOR    | 14.14   | 2.17    | 2.256  | 3.40E-98  |
| DFNA5     | 8.97    | 1.13    | 2.227  | 3.08E-73  |
| DGAT2     | 6.23    | 0.71    | 2.08   | 5.45E-55  |
| DGUOK     | 69.791  | 13.62   | 2.276  | 4.66E-110 |
| DHCR24    | 53.63   | 9.16    | 2.427  | 1.28E-56  |
| DHCR7     | 22.65   | 4.65    | 2.066  | 2.04E-86  |
| DHFR      | 7.93    | 0.78    | 2.327  | 4.93E-118 |
| DHRS9     | 15.18   | 0.1     | 3.879  | 3.16E-62  |
| DIO2      | 4.73    | 0.18    | 2.28   | 8.90E-77  |
| DKK1      | 9.98    | 0.11    | 3.306  | 2.93E-66  |
| DKK3      | 72.902  | 4.71    | 3.694  | 1.06E-110 |
| DLGAP5    | 3.32    | 0.04    | 2.054  | 1.17E-96  |
| DLL4      | 7.71    | 0.91    | 2.189  | 4.47E-84  |
| DMBT1     | 25.779  | 0.28    | 4.387  | 6.11E-57  |
| DNAJA4    | 18.77   | 3.82    | 2.036  | 7.14E-44  |
| DNAJB1    | 86.15   | 16.63   | 2.305  | 2.07E-65  |
| DNAJC15   | 18.911  | 3.3     | 2.211  | 6.08E-103 |
| DNASE1L1  | 25.21   | 5.03    | 2.12   | 8.14E-105 |
| DNASE2    | 47.93   | 10.83   | 2.048  | 4.84E-107 |
| DNTTIP1   | 49.47   | 6.04    | 2.842  | 2.74E-116 |
| DOCK11    | 7.74    | 0.61    | 2.441  | 2.43E-93  |
| DOK2      | 6       | 0.74    | 2.008  | 1.07E-59  |
| DOK4      | 38.991  | 6.39    | 2.436  | 9.36E-93  |
| DOK5      | 5.14    | 0.2     | 2.355  | 1.49E-80  |
| DPCD      | 28.249  | 5.44    | 2.183  | 7.43E-109 |
| DPCR1     | 28.769  | 0.03    | 4.853  | 7.28E-62  |
| DPEP1     | 17.179  | 113.118 | -2.65  | 5.42E-57  |
| DPP10-AS1 | 0.18    | 5.47    | -2.455 | 1.00E-79  |
| DPP3      | 40.341  | 8.52    | 2.119  | 2.82E-95  |

|         |         |        |        |           |
|---------|---------|--------|--------|-----------|
| DPY19L1 | 12.64   | 2.05   | 2.161  | 2.02E-98  |
| DPYSL2  | 32.64   | 3.64   | 2.858  | 3.63E-112 |
| DPYSL3  | 48.04   | 1.37   | 4.371  | 1.51E-115 |
| DRAP1   | 114.697 | 25.539 | 2.124  | 3.56E-103 |
| DSE     | 8.95    | 1.19   | 2.184  | 1.42E-64  |
| DSG2    | 43.51   | 6.27   | 2.614  | 7.68E-82  |
| DUOX2   | 32.751  | 0.12   | 4.913  | 2.21E-70  |
| DUOXA2  | 25.989  | 0.04   | 4.698  | 5.82E-67  |
| DUSP5   | 23.169  | 2.15   | 2.94   | 8.96E-77  |
| DUSP6   | 49.401  | 4.85   | 3.107  | 1.90E-114 |
| DUSP7   | 14.26   | 2.33   | 2.196  | 1.08E-95  |
| DYNC1H1 | 156.464 | 36.481 | 2.071  | 9.31E-95  |
| DYNLL1  | 377.098 | 70.81  | 2.397  | 2.34E-99  |
| DYNLRB1 | 237.6   | 39.7   | 2.551  | 3.45E-113 |
| DYNLT1  | 136.588 | 21.19  | 2.632  | 7.86E-108 |
| DYNLT3  | 26.75   | 4.35   | 2.375  | 9.86E-103 |
| DYRK2   | 12.63   | 2.04   | 2.165  | 6.30E-108 |
| E2F1    | 4.29    | 0.28   | 2.047  | 7.29E-100 |
| E2F3    | 5.36    | 0.53   | 2.055  | 5.73E-104 |
| EBP     | 77.718  | 16.829 | 2.142  | 3.84E-87  |
| ECM1    | 45.629  | 1.59   | 4.17   | 4.65E-106 |
| ECM2    | 6.25    | 0.57   | 2.207  | 1.00E-69  |
| ECT2    | 11.54   | 0.81   | 2.792  | 1.33E-111 |
| EDIL3   | 15.15   | 0.42   | 3.508  | 2.01E-104 |
| EDNRA   | 11.46   | 0.35   | 3.206  | 2.65E-96  |
| EFCAB11 | 7.14    | 1      | 2.025  | 2.26E-114 |
| EFEMP1  | 48.06   | 11.11  | 2.018  | 1.17E-37  |
| EFEMP2  | 81.43   | 10.52  | 2.839  | 1.49E-77  |
| EFNA3   | 7.29    | 0.54   | 2.428  | 6.77E-86  |
| EFNA4   | 16.88   | 2.04   | 2.556  | 4.79E-87  |
| EFNA5   | 7.52    | 0.23   | 2.792  | 5.81E-110 |
| EFNB1   | 42.2    | 2.58   | 3.593  | 1.96E-109 |
| EFNB2   | 23.271  | 1.32   | 3.387  | 7.52E-124 |
| EGF     | 0.46    | 15.85  | -3.529 | 1.24E-109 |
| EGLN2   | 60.921  | 14.03  | 2.043  | 1.17E-91  |
| EGLN3   | 26.93   | 1.65   | 3.398  | 2.16E-75  |
| EGR2    | 7.82    | 0.21   | 2.866  | 2.82E-82  |
| EHBP1L1 | 47.649  | 6.68   | 2.663  | 2.91E-85  |
| EHD1    | 40.009  | 5.17   | 2.733  | 3.06E-113 |
| EHD2    | 50.299  | 10.3   | 2.183  | 2.26E-67  |
| EID1    | 100.468 | 21.32  | 2.185  | 6.64E-86  |
| EIF4E   | 35.5    | 7.86   | 2.043  | 1.88E-85  |
| EIF5AP4 | 4.97    | 0      | 2.578  | 1.50E-141 |
| EIF6    | 194.698 | 30.049 | 2.656  | 2.70E-113 |
| ELF3    | 472.541 | 93.993 | 2.318  | 3.06E-37  |
| ELF4    | 13.14   | 1.03   | 2.8    | 1.66E-122 |
| ELK3    | 23.54   | 2.12   | 2.976  | 1.14E-109 |

|           |         |          |        |           |
|-----------|---------|----------|--------|-----------|
| ELOVL5    | 33.95   | 4.76     | 2.601  | 2.03E-87  |
| ELOVL6    | 8.78    | 0.61     | 2.603  | 5.68E-87  |
| EMB       | 16.429  | 0.55     | 3.491  | 1.58E-122 |
| EMILIN1   | 69.261  | 5.9      | 3.348  | 2.82E-73  |
| EMILIN2   | 12.15   | 1.15     | 2.613  | 5.34E-97  |
| EMP1      | 108.187 | 7.3      | 3.718  | 6.11E-92  |
| EMP2      | 34.539  | 4.69     | 2.643  | 5.90E-100 |
| EMP3      | 85.692  | 5.33     | 3.776  | 1.34E-104 |
| ENC1      | 33.69   | 7.09     | 2.1    | 1.70E-50  |
| ENDOD1    | 16.46   | 1.94     | 2.57   | 4.44E-107 |
| ENO1      | 620.461 | 80.481   | 2.931  | 1.15E-93  |
| ENO2      | 32.901  | 3.14     | 3.034  | 1.05E-82  |
| ENPP2     | 23.07   | 4.02     | 2.261  | 8.93E-40  |
| SEMA3F    | 12.64   | 2.33     | 2.034  | 6.09E-78  |
| LAP3      | 58.61   | 10.65    | 2.355  | 5.73E-89  |
| HS3ST1    | 7.17    | 0.15     | 2.829  | 1.33E-93  |
| MAD1L1    | 22.6    | 3.28     | 2.463  | 2.84E-94  |
| LASP1     | 97.592  | 21.17    | 2.153  | 1.07E-92  |
| TMEM176A  | 155.653 | 10.48    | 3.77   | 1.39E-97  |
| TFPI      | 40.12   | 5.5      | 2.661  | 2.06E-61  |
| PLXND1    | 69.3    | 13.77    | 2.251  | 1.81E-75  |
| HCCS      | 17.6    | 3.53     | 2.038  | 1.88E-114 |
| PRSS22    | 46.491  | 10.43    | 2.055  | 9.31E-35  |
| SKAP2     | 20.269  | 1.69     | 2.983  | 7.08E-122 |
| FAM214B   | 18.301  | 2.48     | 2.472  | 1.19E-98  |
| WDR54     | 16.58   | 3.14     | 2.086  | 9.64E-96  |
| RHBDD2    | 97.261  | 20.21    | 2.212  | 4.86E-95  |
| ITGA3     | 135.082 | 9.7      | 3.669  | 2.32E-101 |
| TMEM132A  | 23.02   | 2.18     | 2.917  | 8.31E-92  |
| TNFRSF12A | 153.223 | 32.41    | 2.207  | 7.89E-50  |
| RALA      | 31.831  | 4.56     | 2.562  | 5.89E-122 |
| ETV1      | 8.06    | 0.55     | 2.547  | 1.32E-99  |
| USH1C     | 53.459  | 2.4      | 4.002  | 4.05E-104 |
| GTF2IRD1  | 22.139  | 4.21     | 2.151  | 1.21E-83  |
| SCIN      | 6.83    | 0.32     | 2.568  | 5.62E-81  |
| PROM1     | 34.871  | 5.98     | 2.362  | 1.01E-40  |
| GAS7      | 8.54    | 1.15     | 2.15   | 8.68E-67  |
| TEAD3     | 20.15   | 3.97     | 2.089  | 7.62E-73  |
| PLEKHG6   | 13.22   | 2.28     | 2.116  | 7.22E-73  |
| ETV7      | 6.68    | 0.4      | 2.456  | 9.53E-92  |
| PRSS3     | 93.37   | 2570.083 | -4.768 | 1.21E-69  |
| FYN       | 32.491  | 5.44     | 2.379  | 8.04E-82  |
| MRC2      | 50.011  | 2.77     | 3.758  | 1.70E-91  |
| TSPAN9    | 22.5    | 4.55     | 2.082  | 6.74E-80  |
| PLAUR     | 101.279 | 1.78     | 5.201  | 4.39E-124 |
| TYROBP    | 156.161 | 9.38     | 3.92   | 6.41E-85  |
| TMEM159   | 31.48   | 4.68     | 2.516  | 1.63E-92  |

|          |          |         |        |           |
|----------|----------|---------|--------|-----------|
| KDM5D    | 2.89     | 16.11   | -2.137 | 0.00221   |
| PSMC4    | 74.951   | 15.67   | 2.188  | 2.95E-104 |
| MVP      | 198.513  | 44.64   | 2.128  | 1.89E-62  |
| GPRC5A   | 141.19   | 0.95    | 6.188  | 7.80E-110 |
| TACC3    | 18.29    | 1.61    | 2.886  | 1.21E-113 |
| MTMR11   | 34.779   | 2.72    | 3.266  | 1.71E-83  |
| WAS      | 8.85     | 1.01    | 2.293  | 1.38E-56  |
| NPC1L1   | 8.03     | 0.19    | 2.924  | 4.01E-73  |
| RALBP1   | 30.041   | 5.03    | 2.364  | 1.67E-113 |
| WWTR1    | 29.1     | 6.18    | 2.068  | 9.00E-50  |
| VSIG2    | 78.091   | 0.48    | 5.74   | 5.80E-100 |
| MARCO    | 11.05    | 0.23    | 3.292  | 1.38E-53  |
| SYT13    | 19.37    | 0.96    | 3.377  | 2.00E-92  |
| RUNX3    | 4.34     | 0.26    | 2.083  | 9.18E-65  |
| GRAMD1B  | 6.88     | 0.45    | 2.442  | 1.70E-82  |
| PLEKH01  | 38.22    | 2.73    | 3.394  | 4.15E-98  |
| TYMP     | 75.118   | 7.94    | 3.09   | 2.92E-65  |
| VIM      | 782.04   | 141.219 | 2.461  | 3.40E-62  |
| FAS      | 11.36    | 1.95    | 2.067  | 2.04E-78  |
| RNASET2  | 145.149  | 23.18   | 2.596  | 8.54E-97  |
| SLAMF7   | 5.65     | 0.14    | 2.544  | 8.45E-76  |
| TNFRSF1B | 19.401   | 2.14    | 2.7    | 4.81E-88  |
| GRN      | 359.039  | 33.369  | 3.389  | 5.56E-120 |
| MAP2K3   | 48.331   | 10.58   | 2.091  | 3.42E-94  |
| TMSB10   | 4461.768 | 253.298 | 4.133  | 1.03E-108 |
| VCL      | 55.341   | 10.25   | 2.324  | 3.66E-86  |
| TIMP2    | 228.269  | 27.319  | 3.017  | 1.03E-86  |
| RPL26L1  | 38.21    | 8.64    | 2.024  | 2.50E-110 |
| MAT2B    | 46.99    | 8.7     | 2.307  | 1.34E-98  |
| VCAN     | 92.199   | 1.59    | 5.169  | 1.24E-102 |
| MSR1     | 12.92    | 0.99    | 2.806  | 3.89E-69  |
| RAI14    | 18.93    | 2.81    | 2.387  | 7.03E-86  |
| PHF23    | 26.53    | 5.64    | 2.052  | 8.17E-107 |
| PSMA4    | 148.476  | 31.78   | 2.189  | 2.27E-95  |
| PARP3    | 17.99    | 2.64    | 2.383  | 5.95E-91  |
| TNC      | 17.869   | 0.62    | 3.542  | 5.89E-76  |
| LCP2     | 13.91    | 1.7     | 2.465  | 3.05E-60  |
| KITLG    | 9.92     | 1.36    | 2.21   | 6.77E-67  |
| VAMP3    | 65.14    | 11.7    | 2.381  | 6.83E-104 |
| LTBP1    | 31.879   | 1.37    | 3.794  | 1.81E-102 |
| RCN1     | 74.119   | 8.5     | 2.983  | 1.70E-117 |
| HEXB     | 170.106  | 41.369  | 2.014  | 3.31E-86  |
| LIMA1    | 65.58    | 11.88   | 2.37   | 2.68E-83  |
| HOMER3   | 30.12    | 5.05    | 2.363  | 2.98E-73  |
| RAD51    | 3.96     | 0.21    | 2.035  | 3.72E-101 |
| THOC3    | 28.291   | 5.99    | 2.067  | 4.32E-98  |
| MSM01    | 44.289   | 7.19    | 2.467  | 2.16E-81  |

|            |         |        |       |           |
|------------|---------|--------|-------|-----------|
| LAMA3      | 76.161  | 1.77   | 4.8   | 1.63E-121 |
| ENTPD2     | 10.96   | 1.02   | 2.566 | 1.22E-84  |
| LY75       | 12.52   | 0.52   | 3.153 | 2.84E-102 |
| OPN3       | 13.11   | 1.43   | 2.538 | 8.37E-93  |
| RELT       | 5.2     | 0.38   | 2.168 | 3.09E-86  |
| PRDM1      | 6.07    | 0.4    | 2.336 | 1.76E-90  |
| LAMC2      | 128.684 | 0.94   | 6.063 | 2.13E-118 |
| TBXAS1     | 21.681  | 1.24   | 3.34  | 9.60E-103 |
| MXD1       | 10.54   | 1.55   | 2.178 | 1.08E-74  |
| SLC2A3     | 21.88   | 2.32   | 2.785 | 2.89E-63  |
| STYK1      | 4.84    | 0.04   | 2.489 | 4.14E-97  |
| GNA15      | 15.43   | 0.37   | 3.584 | 3.66E-116 |
| MRPS35     | 38.239  | 8.15   | 2.1   | 2.65E-110 |
| GPC1       | 38.419  | 8.38   | 2.071 | 1.33E-56  |
| SPA17      | 9.53    | 1.55   | 2.046 | 2.57E-111 |
| SLC12A2    | 17.39   | 2.11   | 2.564 | 1.35E-77  |
| FAR2       | 6.23    | 0.5    | 2.269 | 3.27E-101 |
| SLC9A3R2   | 99.421  | 18.34  | 2.376 | 1.08E-82  |
| OAT        | 46.029  | 9.55   | 2.156 | 7.86E-81  |
| MYLK       | 29.431  | 3.19   | 2.861 | 1.85E-59  |
| TBC1D1     | 56.281  | 12.53  | 2.082 | 8.57E-85  |
| TIE1       | 11.95   | 1.71   | 2.257 | 1.57E-66  |
| SPI1       | 24.71   | 2.28   | 2.971 | 5.62E-71  |
| PFKP       | 74.749  | 4.59   | 3.76  | 3.83E-116 |
| TNFRSF1A   | 124.862 | 24.271 | 2.316 | 2.39E-81  |
| PKM        | 754.04  | 48.539 | 3.93  | 4.92E-127 |
| RHOA       | 358.318 | 73.541 | 2.269 | 1.61E-87  |
| HYAL2      | 51.828  | 9.6    | 2.317 | 6.49E-94  |
| IFI35      | 49.148  | 6.24   | 2.792 | 2.37E-104 |
| PITX1      | 13.09   | 0.08   | 3.706 | 3.21E-86  |
| VPS35      | 38.39   | 8.48   | 2.055 | 7.65E-98  |
| MAOB       | 26.489  | 2.76   | 2.87  | 1.07E-83  |
| PLA2G10    | 12.41   | 1.98   | 2.17  | 1.31E-43  |
| SLC44A1    | 22.751  | 4.07   | 2.228 | 1.48E-92  |
| FSTL3      | 62.37   | 13.13  | 2.165 | 1.91E-33  |
| ST6GALNAC1 | 27.27   | 0.41   | 4.326 | 4.31E-92  |
| OSBPL3     | 14.23   | 1.45   | 2.636 | 2.38E-88  |
| MAP4K4     | 43.03   | 4.79   | 2.927 | 4.27E-110 |
| WDR1       | 155.481 | 24.03  | 2.644 | 1.30E-104 |
| LMCD1      | 58.932  | 7.95   | 2.743 | 5.11E-82  |
| FCGR2B     | 12.41   | 0.57   | 3.094 | 3.15E-67  |
| STK10      | 18.1    | 2.72   | 2.36  | 3.89E-98  |
| NDE1       | 16.49   | 1.57   | 2.767 | 4.74E-111 |
| MRVI1      | 8.81    | 1.09   | 2.231 | 1.65E-66  |
| MCM2       | 8.27    | 1.18   | 2.088 | 5.31E-98  |
| GSDMB      | 35.941  | 6.99   | 2.209 | 4.85E-44  |
| PTGS2      | 4.81    | 0.1    | 2.401 | 4.23E-62  |



|          |         |         |        |           |
|----------|---------|---------|--------|-----------|
| ST6GAL1  | 19.67   | 2.16    | 2.71   | 1.91E-76  |
| NOTCH3   | 31.6    | 3.85    | 2.749  | 8.08E-79  |
| MGLL     | 65.639  | 2.7     | 4.171  | 1.71E-119 |
| ZNF532   | 16.13   | 2.82    | 2.165  | 1.25E-66  |
| HACD3    | 36.661  | 7.33    | 2.177  | 7.10E-108 |
| SRI      | 154.835 | 34.77   | 2.123  | 1.02E-82  |
| SEMA3C   | 18.581  | 0.29    | 3.924  | 9.85E-86  |
| FOSL2    | 41.08   | 8.22    | 2.19   | 6.06E-51  |
| FSCN1    | 54.451  | 2.14    | 4.142  | 4.89E-113 |
| RAB7A    | 148.024 | 31.851  | 2.182  | 1.21E-97  |
| MCM6     | 12.09   | 1.67    | 2.294  | 1.02E-115 |
| SPAG5    | 8.6     | 1.13    | 2.172  | 1.14E-95  |
| MCAM     | 42.39   | 8.46    | 2.197  | 6.63E-57  |
| UBE2T    | 12.37   | 0.31    | 3.351  | 4.16E-142 |
| IL4R     | 45.73   | 9.91    | 2.099  | 3.75E-48  |
| PAK3     | 1.07    | 7.76    | -2.081 | 1.35E-58  |
| GPR137B  | 14.97   | 1.2     | 2.86   | 1.47E-113 |
| FBLN1    | 135.147 | 26.85   | 2.289  | 1.41E-39  |
| FAP      | 35.809  | 1.58    | 3.835  | 2.74E-85  |
| GNB1     | 155.47  | 29.459  | 2.361  | 5.80E-98  |
| TP53INP2 | 13.53   | 2.52    | 2.045  | 3.63E-85  |
| FKBP7    | 15.401  | 1.59    | 2.663  | 3.17E-103 |
| LXN      | 36.44   | 4.4     | 2.794  | 2.31E-99  |
| MKNK1    | 18.97   | 95.312  | -2.27  | 4.05E-87  |
| PAFAH1B3 | 35.559  | 6.89    | 2.212  | 7.88E-96  |
| MOXD1    | 15.66   | 0.67    | 3.318  | 1.11E-83  |
| STX7     | 20.649  | 4.23    | 2.049  | 4.37E-78  |
| KEAP1    | 49.81   | 11.65   | 2.006  | 1.64E-107 |
| PTPRH    | 21.23   | 1.92    | 2.928  | 2.27E-80  |
| PSEN1    | 35.661  | 6.37    | 2.315  | 3.49E-112 |
| NDC80    | 4.4     | 0.1     | 2.295  | 8.83E-110 |
| PTPRC    | 10.19   | 1.03    | 2.463  | 2.09E-49  |
| STK17B   | 10.36   | 1.62    | 2.116  | 1.80E-74  |
| FYB      | 5.69    | 0.3     | 2.364  | 6.31E-65  |
| NFE2L1   | 89.009  | 16.39   | 2.372  | 5.53E-100 |
| GSK3B    | 14.97   | 2.97    | 2.008  | 1.93E-109 |
| ITGB5    | 161.769 | 11.21   | 3.737  | 1.72E-114 |
| PLOD1    | 69.69   | 15.34   | 2.113  | 1.72E-84  |
| OXCT1    | 9.28    | 1.53    | 2.023  | 1.05E-86  |
| FAT1     | 79.439  | 14.3    | 2.394  | 4.74E-77  |
| GSTP1    | 765.627 | 134.084 | 2.505  | 2.85E-64  |
| KIF3C    | 5.42    | 0.6     | 2.005  | 8.17E-83  |
| SLC25A24 | 18.5    | 2.7     | 2.398  | 7.71E-89  |
| IGSF9    | 6.13    | 0.78    | 2.002  | 3.74E-52  |
| MGST2    | 100.037 | 21.681  | 2.155  | 3.52E-102 |
| MAST2    | 18.439  | 3.73    | 2.039  | 5.28E-85  |
| MRPL28   | 60.379  | 13.39   | 2.093  | 4.15E-95  |

|          |          |         |        |           |
|----------|----------|---------|--------|-----------|
| ERO1LB   | 6.92     | 54.64   | -2.813 | 1.28E-49  |
| HSD17B2  | 45.439   | 7.47    | 2.455  | 1.30E-34  |
| LAT2     | 11.44    | 1.5     | 2.315  | 4.86E-65  |
| NOX4     | 8.15     | 0.2     | 2.931  | 1.35E-89  |
| PPP1R15A | 55.541   | 8.69    | 2.545  | 9.28E-78  |
| HSD17B14 | 10.47    | 1.05    | 2.484  | 9.00E-73  |
| FTL      | 4414.7   | 722.322 | 2.61   | 7.11E-74  |
| PIGS     | 40.201   | 9.26    | 2.006  | 1.47E-90  |
| MMP2     | 258.567  | 16.99   | 3.851  | 1.13E-72  |
| LPCAT2   | 10.76    | 1.33    | 2.335  | 4.69E-88  |
| PTHLH    | 5.1      | 0.21    | 2.334  | 1.05E-75  |
| PHACTR3  | 5.52     | 0.14    | 2.516  | 7.11E-59  |
| SULT2B1  | 6.93     | 0.22    | 2.7    | 1.21E-73  |
| TPX2     | 9.55     | 0.09    | 3.275  | 1.88E-116 |
| FER1L4   | 11.43    | 0.43    | 3.12   | 8.55E-59  |
| EPB41L1  | 48.68    | 8.39    | 2.404  | 6.39E-85  |
| SMOX     | 20.559   | 4.28    | 2.03   | 2.64E-78  |
| FKBP1A   | 196.501  | 46.189  | 2.065  | 7.87E-84  |
| SLC4A11  | 5.85     | 0.21    | 2.501  | 8.22E-87  |
| F11      | 1.79     | 12.65   | -2.291 | 7.18E-57  |
| OAS1     | 45.781   | 1.4     | 4.285  | 8.72E-115 |
| PXN      | 64.391   | 14.77   | 2.052  | 3.26E-83  |
| FXYD5    | 309.521  | 9.04    | 4.951  | 1.81E-126 |
| FXYD3    | 599.202  | 19.41   | 4.878  | 1.01E-105 |
| HEPH     | 15.57    | 0.54    | 3.428  | 1.16E-104 |
| SLC9A1   | 31.741   | 4.74    | 2.512  | 1.82E-98  |
| RGS1     | 62.738   | 4.24    | 3.605  | 2.33E-62  |
| NDUFB2   | 235.127  | 57.308  | 2.018  | 1.59E-88  |
| ICAM1    | 35.37    | 2.91    | 3.218  | 4.73E-75  |
| LYZ      | 837.357  | 12.59   | 5.947  | 5.63E-90  |
| P3H2     | 9.2      | 1.31    | 2.143  | 3.47E-66  |
| PLEKHG2  | 15.6     | 2.93    | 2.079  | 4.87E-64  |
| NAT14    | 19.521   | 3.55    | 2.173  | 9.97E-77  |
| SEL1L3   | 72.639   | 16.33   | 2.087  | 6.79E-61  |
| NLRP1    | 18.81    | 3.69    | 2.079  | 1.30E-47  |
| PSME1    | 259.663  | 50.091  | 2.351  | 5.73E-92  |
| EZR      | 222.706  | 29.531  | 2.873  | 1.13E-95  |
| MYL6     | 2224.244 | 394.258 | 2.493  | 8.27E-80  |
| UNC13D   | 24.57    | 4.13    | 2.317  | 1.32E-52  |
| TGFB2    | 7.06     | 0.95    | 2.047  | 4.88E-51  |
| GABRP    | 26       | 0.12    | 4.591  | 2.01E-70  |
| EPB41L4B | 9.07     | 48.67   | -2.302 | 1.52E-60  |
| PTGS1    | 6.72     | 0.66    | 2.217  | 1.99E-76  |
| TBC1D2   | 12.84    | 1.06    | 2.748  | 1.08E-113 |
| SMIM24   | 50.021   | 1.58    | 4.306  | 2.56E-80  |
| TREM2    | 23.801   | 0.97    | 3.654  | 1.60E-82  |
| ITPR3    | 30.29    | 4.61    | 2.48   | 1.15E-68  |

|          |         |        |       |           |
|----------|---------|--------|-------|-----------|
| SCD      | 36.279  | 2.29   | 3.502 | 2.60E-86  |
| PRTFDC1  | 8.49    | 1.09   | 2.183 | 6.10E-103 |
| TSPAN15  | 88.462  | 7      | 3.483 | 1.34E-96  |
| H2AFY2   | 14.54   | 2.69   | 2.074 | 2.65E-81  |
| MISP     | 49.169  | 0.21   | 5.374 | 2.24E-151 |
| MMP11    | 266.242 | 0.56   | 7.42  | 2.96E-119 |
| SUSD2    | 9.43    | 1.41   | 2.114 | 4.25E-54  |
| GGT5     | 71.649  | 8.52   | 2.932 | 5.38E-83  |
| SEC14L2  | 20.639  | 1.54   | 3.091 | 1.73E-111 |
| SNRPD3   | 107.098 | 20.831 | 2.308 | 1.98E-113 |
| MFNG     | 11.18   | 1.74   | 2.152 | 7.88E-76  |
| SH3BP1   | 12.3    | 1.51   | 2.406 | 7.17E-91  |
| LGALS1   | 962.604 | 51.76  | 4.191 | 2.40E-97  |
| PIK3IP1  | 34.659  | 3.85   | 2.878 | 3.42E-94  |
| SLC5A1   | 11.07   | 0.43   | 3.077 | 7.76E-78  |
| KDELR3   | 32.43   | 5.23   | 2.424 | 5.27E-86  |
| TIMP3    | 151.208 | 27.67  | 2.408 | 1.81E-52  |
| TOM1     | 46.301  | 9.88   | 2.12  | 8.24E-93  |
| HMOX1    | 21.31   | 1.77   | 3.01  | 2.47E-80  |
| TSPO     | 295.988 | 34.811 | 3.052 | 1.05E-78  |
| PDGFB    | 14.09   | 2.39   | 2.154 | 1.22E-76  |
| KIAA0930 | 41.469  | 7.55   | 2.312 | 8.46E-91  |
| NCF4     | 10.46   | 1.28   | 2.329 | 4.07E-61  |
| KCTD17   | 16.53   | 1.89   | 2.601 | 8.33E-104 |
| RBX1     | 51.771  | 10.26  | 2.229 | 1.13E-109 |
| PYGL     | 16.829  | 2.82   | 2.223 | 3.05E-68  |
| PLEK2    | 51.588  | 2.68   | 3.837 | 3.35E-88  |
| SPTLC2   | 15.27   | 2.16   | 2.364 | 4.26E-124 |
| RIN3     | 12.14   | 1.12   | 2.632 | 6.54E-98  |
| LGMN     | 120.358 | 14.69  | 2.951 | 1.26E-109 |
| ERH      | 112.352 | 23.61  | 2.203 | 5.22E-104 |
| HIF1A    | 65.462  | 9      | 2.733 | 3.51E-83  |
| GSKIP    | 19.51   | 3.42   | 2.214 | 1.69E-105 |
| PSME2    | 232.985 | 49.752 | 2.205 | 1.77E-85  |
| SEC23A   | 19.231  | 3.09   | 2.306 | 2.64E-88  |
| GSS      | 35.031  | 5.68   | 2.431 | 1.58E-122 |
| MMP9     | 21.091  | 0.11   | 4.315 | 1.69E-95  |
| PYGB     | 80.12   | 10.15  | 2.863 | 2.49E-105 |
| PROCR    | 26.259  | 3.1    | 2.733 | 5.21E-92  |
| SLM02    | 36.811  | 7.58   | 2.14  | 2.67E-98  |
| SLC04A1  | 14.9    | 2.39   | 2.23  | 3.37E-47  |
| SLC17A9  | 14.67   | 2.15   | 2.315 | 1.21E-49  |
| PTK6     | 18.84   | 0.94   | 3.354 | 1.75E-75  |
| RASSF2   | 7.08    | 0.77   | 2.191 | 1.04E-62  |
| SLC52A3  | 6.58    | 0.45   | 2.386 | 1.30E-89  |
| FERMT1   | 15.519  | 0.69   | 3.289 | 5.84E-106 |
| MYL9     | 325.564 | 26.55  | 3.567 | 5.80E-88  |

|         |          |        |       |           |
|---------|----------|--------|-------|-----------|
| HCK     | 13.07    | 0.93   | 2.866 | 4.49E-72  |
| MAPRE1  | 56.308   | 12.29  | 2.108 | 5.16E-96  |
| WFDC2   | 202.348  | 7.9    | 4.514 | 5.11E-84  |
| FAM83D  | 4.23     | 0.1    | 2.249 | 4.07E-77  |
| SYNDIG1 | 3.69     | 0.1    | 2.092 | 4.85E-79  |
| MYL12A  | 568.414  | 89.771 | 2.649 | 1.42E-81  |
| SMAD7   | 16.88    | 3.46   | 2.003 | 6.61E-70  |
| LIPG    | 6.07     | 0.45   | 2.286 | 7.40E-78  |
| MXRA5   | 35.26    | 1.81   | 3.69  | 9.43E-75  |
| VSIG1   | 11.39    | 0.03   | 3.588 | 2.64E-57  |
| STS     | 6.38     | 0.8    | 2.036 | 9.82E-88  |
| PGRMC1  | 74.042   | 13.96  | 2.327 | 5.26E-106 |
| PLS3    | 72.519   | 9.1    | 2.864 | 8.81E-101 |
| RENBP   | 11.17    | 0.93   | 2.657 | 1.50E-83  |
| PIM2    | 12.63    | 1.79   | 2.288 | 1.60E-89  |
| PGK1    | 287.954  | 44.319 | 2.673 | 2.78E-98  |
| SMS     | 63.65    | 8.84   | 2.716 | 9.50E-126 |
| RP2     | 6.56     | 0.85   | 2.031 | 7.33E-105 |
| VGLL1   | 4.5      | 0.22   | 2.173 | 3.17E-47  |
| TIMP1   | 1414.424 | 46.951 | 4.884 | 6.89E-107 |
| MAGED2  | 117.221  | 26.099 | 2.125 | 3.03E-88  |
| SRPX2   | 16.22    | 1.27   | 2.923 | 8.83E-81  |
| GLA     | 23.48    | 4.83   | 2.07  | 2.79E-100 |
| KLF5    | 67.302   | 3.2    | 4.023 | 1.20E-97  |
| STK24   | 85.07    | 18.43  | 2.147 | 3.04E-97  |
| PARP4   | 30.549   | 5.95   | 2.183 | 3.17E-82  |
| TSC22D1 | 110.438  | 13.69  | 2.923 | 4.99E-85  |
| OLFM4   | 322.241  | 29.67  | 3.398 | 5.34E-12  |
| MSLN    | 189.755  | 0.12   | 7.412 | 1.22E-109 |
| MAPK3   | 98.659   | 13.88  | 2.744 | 2.74E-116 |
| GDPD3   | 7.89     | 1.11   | 2.075 | 8.43E-61  |
| N4BP1   | 19.18    | 4.04   | 2.001 | 4.96E-93  |
| PLA2G15 | 15.34    | 3.04   | 2.016 | 1.31E-91  |
| FA2H    | 24.289   | 2.36   | 2.912 | 1.05E-73  |
| HCFC1R1 | 122.827  | 17.37  | 2.753 | 2.68E-99  |
| SLC7A5  | 15.76    | 1.38   | 2.816 | 7.03E-64  |
| PIEZ01  | 101.997  | 13.12  | 2.867 | 1.26E-75  |
| TCEB2   | 401.79   | 73.099 | 2.442 | 1.30E-104 |
| TOX3    | 7.52     | 0.91   | 2.157 | 2.10E-65  |
| PYCARD  | 58.822   | 4.28   | 3.502 | 3.49E-112 |
| TMC5    | 58.032   | 0.87   | 4.98  | 1.47E-100 |
| RAB11A  | 195.117  | 30.46  | 2.64  | 3.79E-109 |
| VPS18   | 12.84    | 2.26   | 2.086 | 2.45E-117 |
| LAPTM4B | 59.56    | 11.69  | 2.255 | 5.38E-88  |
| PLAT    | 123.237  | 3.06   | 4.935 | 2.37E-110 |
| WISP1   | 8.46     | 0.17   | 3.015 | 5.55E-79  |
| NDRG1   | 132.807  | 30.311 | 2.095 | 1.20E-63  |

|           |         |         |        |           |
|-----------|---------|---------|--------|-----------|
| STMN2     | 11.05   | 0.78    | 2.759  | 3.61E-63  |
| SQLE      | 28.019  | 3.22    | 2.782  | 1.82E-91  |
| TNFRSF10A | 8.71    | 0.87    | 2.376  | 6.05E-87  |
| FGL1      | 1.97    | 132.697 | -5.492 | 2.48E-67  |
| MAN2B1    | 81.199  | 16.731  | 2.213  | 2.31E-91  |
| KCNN4     | 78.531  | 0.39    | 5.838  | 1.05E-117 |
| NUCB1     | 255.52  | 59.531  | 2.083  | 1.70E-80  |
| RELB      | 25.64   | 5.14    | 2.117  | 1.21E-57  |
| PPP1R13L  | 62.111  | 13.3    | 2.142  | 1.02E-53  |
| RNASEH2A  | 18.04   | 3.75    | 2.003  | 2.28E-105 |
| IL4I1     | 4.7     | 0.24    | 2.201  | 2.47E-74  |
| PPP6R1    | 41.879  | 8.07    | 2.241  | 1.55E-105 |
| GPI       | 178.02  | 34.379  | 2.339  | 7.79E-96  |
| TBCB      | 122.904 | 21.58   | 2.456  | 9.37E-102 |
| SLC1A5    | 62.782  | 10.51   | 2.47   | 3.21E-75  |
| TJP3      | 39.129  | 4.83    | 2.783  | 6.21E-62  |
| TGFB1     | 50.001  | 5.3     | 3.017  | 3.00E-89  |
| PLIN3     | 58.351  | 6.89    | 2.911  | 1.05E-108 |
| MYH14     | 79.489  | 7.66    | 3.216  | 1.64E-96  |
| NKG7      | 7.93    | 0.58    | 2.499  | 7.16E-70  |
| ETFB      | 126.263 | 27.24   | 2.172  | 1.30E-95  |
| MEIS3     | 12.9    | 1.62    | 2.407  | 5.26E-70  |
| FAM83E    | 30.95   | 0.5     | 4.413  | 4.34E-108 |
| PLEKHA4   | 27.62   | 4.79    | 2.305  | 9.22E-78  |
| PPP2R1A   | 177.637 | 37.579  | 2.211  | 2.92E-98  |
| TFPT      | 24.989  | 3.36    | 2.576  | 1.91E-115 |
| PDE4C     | 16.959  | 0.93    | 3.218  | 5.69E-60  |
| LSR       | 212.437 | 39.371  | 2.402  | 1.86E-71  |
| HPN       | 8.77    | 103.278 | -3.416 | 1.39E-69  |
| ETHE1     | 67.199  | 14.77   | 2.113  | 5.57E-79  |
| SMG9      | 40.481  | 7.11    | 2.355  | 9.33E-101 |
| PON2      | 66.611  | 15.44   | 2.04   | 2.40E-74  |
| MTPN      | 52.45   | 7.12    | 2.719  | 3.37E-114 |
| H2AFV     | 110.43  | 26.37   | 2.025  | 5.03E-101 |
| MET       | 23.73   | 2.31    | 2.901  | 4.77E-82  |
| WNT2      | 4.96    | 0.02    | 2.547  | 1.45E-78  |
| VIPR2     | 0.45    | 5.9     | -2.251 | 6.43E-93  |
| STX1A     | 28.561  | 5.24    | 2.244  | 2.42E-57  |
| HSPB1     | 950.537 | 189.243 | 2.322  | 1.07E-40  |
| NUDT1     | 29.3    | 3.52    | 2.745  | 4.87E-123 |
| PCOLCE    | 96.228  | 16.89   | 2.442  | 7.22E-62  |
| SERPINE1  | 89.052  | 6.66    | 3.555  | 1.44E-68  |
| RPA3      | 28.869  | 5.61    | 2.176  | 6.07E-110 |
| SFRP4     | 80.147  | 0.97    | 5.364  | 2.40E-93  |
| GIMAP2    | 11.42   | 0.75    | 2.827  | 2.04E-93  |
| TMEM176B  | 227.685 | 15.88   | 3.76   | 8.84E-94  |
| LIMK1     | 24.319  | 4.17    | 2.292  | 1.38E-97  |

|          |         |        |        |           |
|----------|---------|--------|--------|-----------|
| SLC1A1   | 11.05   | 0.79   | 2.751  | 6.94E-76  |
| TRIM14   | 13.81   | 0.86   | 2.993  | 8.11E-120 |
| TGFBR1   | 17.91   | 2.49   | 2.438  | 9.30E-87  |
| PTGR1    | 40.411  | 7.81   | 2.233  | 1.23E-79  |
| PDLIM1   | 187.571 | 36.549 | 2.328  | 8.42E-71  |
| UNC5B    | 15.14   | 1.35   | 2.78   | 7.46E-102 |
| SPOCK2   | 10.46   | 0.59   | 2.849  | 5.54E-78  |
| MICU1    | 36.821  | 6.65   | 2.306  | 6.16E-122 |
| LIPA     | 43.8    | 7.31   | 2.431  | 1.28E-83  |
| LHPP     | 16.97   | 3.45   | 2.014  | 9.48E-102 |
| SH3PXD2A | 16.87   | 2.88   | 2.203  | 1.93E-81  |
| UBE2S    | 30.279  | 2.36   | 3.219  | 9.77E-134 |
| TSPAN14  | 46.291  | 10.7   | 2.015  | 1.98E-77  |
| KRT23    | 15.35   | 0.63   | 3.326  | 9.53E-57  |
| RAPGEFL1 | 19.721  | 3.45   | 2.219  | 1.43E-54  |
| P2RX1    | 1.63    | 24.989 | -3.305 | 1.08E-103 |
| HOXB6    | 10.88   | 0.44   | 3.044  | 6.35E-90  |
| PFN1     | 571.733 | 87.638 | 2.692  | 2.27E-96  |
| ICAM2    | 28.829  | 5.71   | 2.152  | 1.03E-84  |
| LGALS3BP | 434.345 | 26.359 | 3.992  | 7.01E-132 |
| RAB5C    | 120.977 | 26.07  | 2.172  | 9.83E-96  |
| VAT1     | 106.661 | 25.389 | 2.028  | 2.76E-77  |
| PPY      | 64.771  | 13.56  | 2.175  | 1.31E-11  |
| FAM20A   | 9.83    | 1.03   | 2.415  | 1.54E-63  |
| MMD      | 9.86    | 0.96   | 2.47   | 8.02E-94  |
| PMP22    | 68.702  | 8.27   | 2.911  | 1.51E-80  |
| RAB34    | 58.712  | 3.93   | 3.598  | 7.13E-99  |
| TMEM33   | 20.45   | 3.74   | 2.178  | 2.26E-104 |
| ODAM     | 4.71    | 0.17   | 2.287  | 5.55E-54  |
| NMU      | 10.41   | 0.03   | 3.47   | 4.61E-79  |
| KIAA1211 | 4.38    | 0.13   | 2.251  | 6.72E-80  |
| INPP4B   | 12.29   | 0.75   | 2.925  | 1.37E-96  |
| KLHL5    | 14.51   | 2.52   | 2.14   | 1.49E-71  |
| HTATIP2  | 63.592  | 10.19  | 2.529  | 4.57E-99  |
| MTCH2    | 58.85   | 12.2   | 2.181  | 2.40E-104 |
| UNC93B1  | 53.319  | 7.68   | 2.646  | 7.24E-94  |
| MS4A6A   | 56.68   | 5.53   | 3.143  | 7.33E-65  |
| MS4A4A   | 13.74   | 1.81   | 2.391  | 1.49E-52  |
| ST3GAL4  | 28.31   | 4.22   | 2.489  | 7.19E-63  |
| FOLR1    | 11.8    | 1.57   | 2.316  | 2.10E-42  |
| PANX1    | 10.72   | 1.9    | 2.015  | 7.82E-95  |
| IL10RA   | 8.65    | 1.27   | 2.088  | 3.50E-54  |
| SLC15A3  | 70.141  | 3.35   | 4.032  | 3.58E-109 |
| MDK      | 367.397 | 10.05  | 5.059  | 4.01E-131 |
| SLC22A18 | 40.26   | 5.88   | 2.584  | 2.31E-44  |
| P3H3     | 26.891  | 5.7    | 2.058  | 1.09E-71  |
| SELPLG   | 26.299  | 0.69   | 4.014  | 2.07E-107 |

|          |          |           |        |           |
|----------|----------|-----------|--------|-----------|
| KCTD10   | 21.54    | 4.36      | 2.072  | 2.16E-90  |
| GLI1     | 4.3      | 0.32      | 2.005  | 4.89E-69  |
| FOXM1    | 8.32     | 0.55      | 2.588  | 1.17E-92  |
| OAS3     | 12.65    | 0.89      | 2.852  | 4.82E-94  |
| OAS2     | 16.549   | 0.48      | 3.568  | 2.20E-83  |
| MGP      | 633.762  | 71.288    | 3.134  | 7.64E-62  |
| RASAL1   | 13.56    | 1.01      | 2.857  | 5.11E-78  |
| VDR      | 13.46    | 0.75      | 3.047  | 6.10E-119 |
| GAPDH    | 2426.564 | 232.404   | 3.379  | 8.80E-106 |
| TPI1     | 461.791  | 92.661    | 2.305  | 4.52E-84  |
| PTPN6    | 47.698   | 10.23     | 2.116  | 1.47E-80  |
| NEDD9    | 21.5     | 3.13      | 2.446  | 6.24E-87  |
| NCOA7    | 28.34    | 4.06      | 2.536  | 9.36E-79  |
| STK38    | 25.801   | 4.47      | 2.293  | 2.60E-96  |
| MCM3     | 30.99    | 6.32      | 2.128  | 3.48E-104 |
| RAB23    | 6.89     | 0.63      | 2.275  | 1.29E-80  |
| VNN1     | 9.43     | 0.34      | 2.96   | 1.71E-60  |
| VNN2     | 7.15     | 0.51      | 2.432  | 2.10E-55  |
| PERP     | 88.603   | 10.81     | 2.924  | 9.73E-103 |
| MDFI     | 27.57    | 0.88      | 3.926  | 4.59E-110 |
| TFEB     | 23.07    | 4.54      | 2.119  | 1.53E-84  |
| PTK7     | 55.008   | 6.19      | 2.962  | 3.61E-87  |
| LAMA4    | 25.88    | 1.42      | 3.473  | 4.20E-112 |
| LY86     | 9.98     | 0.5       | 2.872  | 1.07E-73  |
| KIF20A   | 4.05     | 0.07      | 2.239  | 3.20E-103 |
| PFDN1    | 58.809   | 12.02     | 2.2    | 7.81E-113 |
| HBEGF    | 16.88    | 1.17      | 3.043  | 6.73E-92  |
| LOX      | 14.06    | 1.18      | 2.788  | 1.09E-66  |
| SPARC    | 2167.775 | 49.49     | 5.425  | 8.01E-114 |
| THBS4    | 38.869   | 6.37      | 2.436  | 1.03E-42  |
| LMNB1    | 13.37    | 1.23      | 2.688  | 5.32E-114 |
| SUB1     | 175.374  | 37.83     | 2.183  | 6.43E-98  |
| GNPDA1   | 24.01    | 4.33      | 2.23   | 1.08E-111 |
| H2AFY    | 142.734  | 20.22     | 2.76   | 1.09E-118 |
| PDGFRB   | 63.689   | 8.34      | 2.792  | 3.45E-73  |
| SERPINI2 | 0.51     | 192.497   | -7.002 | 3.01E-87  |
| GNAI2    | 214.182  | 24.07     | 3.102  | 2.92E-106 |
| GNB4     | 6.48     | 0.68      | 2.155  | 2.28E-75  |
| HHLA2    | 6.82     | 0.36      | 2.524  | 8.47E-58  |
| MOB1A    | 34.671   | 5.55      | 2.445  | 6.00E-103 |
| ITGB6    | 50.251   | 6.59      | 2.755  | 2.50E-49  |
| PSMD14   | 35.461   | 6.32      | 2.316  | 1.54E-115 |
| PDE1A    | 5.57     | 0.62      | 2.02   | 8.33E-73  |
| RTN4     | 169.494  | 34.09     | 2.281  | 2.60E-90  |
| REG1A    | 555.098  | 34447.221 | -5.953 | 7.32E-48  |
| FN1      | 978.955  | 17.23     | 5.748  | 1.81E-102 |
| STAT1    | 53.578   | 8.2       | 2.569  | 7.65E-84  |

|         |         |        |       |           |
|---------|---------|--------|-------|-----------|
| IGFBP5  | 189.755 | 8.7    | 4.298 | 1.34E-83  |
| TXNDC9  | 20.391  | 4.24   | 2.029 | 9.24E-107 |
| PDCL3   | 20.609  | 3.99   | 2.115 | 6.22E-117 |
| IL1R2   | 12.19   | 0.8    | 2.873 | 2.18E-62  |
| FHL2    | 116.331 | 3.32   | 4.763 | 1.59E-131 |
| MLPH    | 121.439 | 11.37  | 3.307 | 1.71E-82  |
| UXS1    | 26.88   | 5.91   | 2.012 | 1.57E-97  |
| PROC    | 4.39    | 0.23   | 2.132 | 5.35E-77  |
| PLEKHB2 | 39.229  | 7.52   | 2.239 | 1.47E-106 |
| QPCT    | 21.791  | 1.57   | 3.149 | 4.05E-76  |
| SDC1    | 144.567 | 5.41   | 4.505 | 6.92E-113 |
| KYNU    | 11.71   | 0.22   | 3.381 | 1.35E-108 |
| WIPF1   | 23.591  | 2.53   | 2.8   | 5.97E-80  |
| PLEK    | 6.57    | 0.56   | 2.279 | 1.20E-54  |
| RND3    | 24.13   | 1.89   | 3.12  | 2.06E-106 |
| SUM01   | 103.17  | 16.939 | 2.538 | 9.87E-121 |
| EPHA4   | 5.42    | 0.42   | 2.177 | 2.03E-86  |
| PRRX1   | 17.43   | 1.05   | 3.168 | 2.99E-75  |
| SCP2    | 138.591 | 30.311 | 2.156 | 1.51E-90  |
| LRRC42  | 25.08   | 4.52   | 2.24  | 1.25E-103 |
| ICMT    | 31.41   | 6.61   | 2.09  | 1.10E-103 |
| QSOX1   | 190.216 | 35.971 | 2.371 | 1.44E-81  |
| RAP1A   | 50.86   | 11.27  | 2.08  | 1.25E-80  |
| RNF19B  | 26.031  | 3.04   | 2.742 | 2.83E-111 |
| NCF2    | 19.11   | 1.02   | 3.315 | 2.70E-70  |
| GADD45A | 34.539  | 6.36   | 2.272 | 1.65E-85  |
| MAP7D1  | 70.609  | 8.95   | 2.847 | 4.73E-107 |
| SIPA1L2 | 9.07    | 1.48   | 2.022 | 9.96E-70  |
| MFAP2   | 74.222  | 9.34   | 2.863 | 1.69E-59  |
| RGS4    | 6.96    | 0.74   | 2.194 | 1.16E-50  |
| GBP3    | 25.37   | 1.89   | 3.19  | 1.37E-76  |
| GBP1    | 16.09   | 1.72   | 2.652 | 4.32E-70  |
| GALE    | 67.982  | 7.28   | 3.059 | 4.79E-87  |
| P3H1    | 35.72   | 6.92   | 2.213 | 2.10E-82  |
| SLC2A1  | 131.908 | 2.82   | 5.121 | 8.91E-117 |
| PRDX1   | 363.295 | 44.711 | 2.994 | 9.35E-107 |
| TSPAN1  | 258.459 | 2.14   | 6.369 | 3.88E-133 |
| HSD11B1 | 8.27    | 0.57   | 2.562 | 5.17E-68  |
| IRF6    | 29.96   | 6.6    | 2.026 | 9.35E-72  |
| STMN1   | 104.162 | 8.49   | 3.47  | 3.27E-118 |
| NEK2    | 4.93    | 0.05   | 2.498 | 5.50E-102 |
| MUC5B   | 39.929  | 0.87   | 4.452 | 7.16E-51  |
| NRP2    | 21.869  | 0.65   | 3.793 | 4.41E-115 |
| RAB32   | 31.769  | 3.84   | 2.759 | 3.96E-88  |
| MYL12B  | 545.108 | 78.08  | 2.788 | 1.93E-98  |
| SPP1    | 540.218 | 62.439 | 3.093 | 2.35E-30  |
| RARRES1 | 32.89   | 2.6    | 3.235 | 5.17E-55  |



|          |         |        |       |           |
|----------|---------|--------|-------|-----------|
| PPL      | 27.41   | 3.86   | 2.547 | 4.23E-73  |
| NDUFB3   | 78.88   | 15.899 | 2.241 | 7.06E-110 |
| GDA      | 11.12   | 0.45   | 3.063 | 8.37E-85  |
| ITGB1BP1 | 62.751  | 11.22  | 2.383 | 9.00E-105 |
| PTBP3    | 25.05   | 3.96   | 2.393 | 2.68E-103 |
| PPP2R4   | 113.873 | 23.93  | 2.204 | 3.92E-91  |
| PHF19    | 17.59   | 2.29   | 2.498 | 4.11E-110 |
| PGF      | 12.19   | 1.7    | 2.288 | 3.89E-78  |
| IFI27L2  | 108.157 | 8.61   | 3.506 | 3.69E-118 |
| NPC2     | 284.344 | 45.901 | 2.605 | 1.70E-97  |
| LTBP2    | 28.15   | 2.49   | 3.062 | 1.39E-83  |
| GPR68    | 5.54    | 0.23   | 2.411 | 4.37E-90  |
| EPCAM    | 327.919 | 53.341 | 2.598 | 4.05E-76  |
| IFIT3    | 17.019  | 1.81   | 2.681 | 1.34E-77  |
| IFIT2    | 6.98    | 0.68   | 2.248 | 4.82E-82  |
| GNA13    | 17.53   | 3.17   | 2.152 | 1.74E-93  |
| HOXB5    | 5.12    | 0.28   | 2.257 | 6.11E-90  |
| PLEKHG1  | 5.85    | 0.47   | 2.22  | 1.45E-95  |
| PDZD11   | 43.661  | 8.47   | 2.238 | 2.47E-121 |
| PLXDC2   | 16.381  | 0.87   | 3.216 | 1.56E-90  |
| HSPH1    | 45.879  | 9.95   | 2.098 | 5.32E-75  |
| TGFBI    | 168.791 | 7.64   | 4.297 | 4.27E-96  |
| PLS1     | 30.149  | 2.64   | 3.097 | 6.11E-90  |
| GLT8D2   | 14.05   | 1.02   | 2.897 | 3.94E-87  |
| PDLIM2   | 56.96   | 7.61   | 2.751 | 1.76E-93  |
| SCPEP1   | 47.679  | 9.06   | 2.275 | 1.44E-75  |
| NCAPH    | 4.01    | 0.1    | 2.187 | 2.00E-104 |
| PLBD1    | 54.518  | 7.64   | 2.684 | 2.60E-67  |
| NAA50    | 52.008  | 12.11  | 2.016 | 1.28E-84  |
| FABP3    | 13.16   | 0.87   | 2.921 | 7.99E-81  |
| TNFSF10  | 51.31   | 8.1    | 2.523 | 3.25E-81  |
| TMEM54   | 100.663 | 12.2   | 2.945 | 2.48E-102 |
| SASH3    | 7.28    | 0.76   | 2.234 | 1.55E-51  |
| FMOD     | 39.799  | 5.06   | 2.751 | 1.88E-84  |
| 7-Sep    | 87.147  | 13.92  | 2.563 | 3.47E-108 |
| INHBA    | 15.58   | 0.09   | 3.927 | 4.36E-99  |
| FKBP9    | 74.63   | 17.6   | 2.024 | 2.86E-89  |
| TWIST1   | 5       | 0.2    | 2.322 | 2.42E-68  |
| GLIPR2   | 20.831  | 1.44   | 3.161 | 4.01E-85  |
| SPINK4   | 3.54    | 0.1    | 2.045 | 4.21E-27  |
| PLAU     | 86.222  | 1.97   | 4.876 | 1.36E-103 |
| SRGN     | 94.208  | 7.89   | 3.421 | 1.72E-79  |
| P4HA1    | 29.321  | 6      | 2.115 | 2.01E-68  |
| ZWINT    | 14.47   | 1.25   | 2.781 | 8.12E-116 |
| HVCN1    | 6.69    | 0.57   | 2.292 | 6.44E-77  |
| SSPN     | 10.79   | 1.1    | 2.489 | 5.74E-86  |
| GIPC1    | 137.653 | 17.33  | 2.919 | 1.16E-105 |

|         |         |         |        |           |
|---------|---------|---------|--------|-----------|
| OPTN    | 60.938  | 13.56   | 2.089  | 3.79E-91  |
| NCKAP1L | 6.88    | 0.69    | 2.221  | 1.82E-56  |
| MMP19   | 12.4    | 2.09    | 2.117  | 1.97E-46  |
| ORMDL2  | 58.318  | 12.1    | 2.179  | 3.07E-103 |
| LRP1    | 90.452  | 11.01   | 2.929  | 1.15E-89  |
| TUBA1B  | 538.274 | 60.681  | 3.128  | 1.34E-99  |
| HJURP   | 3.54    | 0.08    | 2.072  | 3.52E-94  |
| NMI     | 23.581  | 3.06    | 2.598  | 4.07E-105 |
| TNFAIP6 | 7.93    | 0.09    | 3.034  | 1.23E-86  |
| GOS2    | 25.751  | 5       | 2.157  | 3.93E-31  |
| PI3     | 41.409  | 0.33    | 4.995  | 2.25E-88  |
| SLPI    | 414.146 | 9.37    | 5.323  | 4.80E-96  |
| WFDC3   | 5.9     | 0.26    | 2.453  | 5.34E-61  |
| SDC4    | 194.819 | 26.87   | 2.813  | 1.96E-74  |
| ZNFX1   | 17.12   | 2.44    | 2.397  | 2.50E-113 |
| PTGIS   | 11.76   | 0.81    | 2.818  | 2.93E-61  |
| SNAI1   | 7.83    | 0.94    | 2.186  | 3.30E-66  |
| PMEPA1  | 117.099 | 9.77    | 3.455  | 2.48E-81  |
| RBPJL   | 0.14    | 374.597 | -8.364 | 5.49E-130 |
| PEPD    | 47.179  | 10.63   | 2.051  | 1.45E-92  |
| PAIP2B  | 1.31    | 13.6    | -2.66  | 9.53E-93  |
| POF1B   | 11.8    | 1.57    | 2.316  | 1.32E-65  |
| LYPD3   | 5.22    | 0.46    | 2.091  | 8.48E-60  |
| F13A1   | 14.32   | 2.34    | 2.198  | 8.90E-46  |
| SPDEF   | 14.83   | 0.14    | 3.796  | 1.49E-86  |
| GNMT    | 0.7     | 176.9   | -6.709 | 1.15E-95  |
| TREM1   | 11.81   | 0.21    | 3.404  | 6.22E-80  |
| SOX4    | 21.19   | 3.3     | 2.368  | 2.27E-76  |
| RUNX2   | 5.25    | 0.22    | 2.357  | 3.10E-89  |
| LRRFIP1 | 61.252  | 10.92   | 2.385  | 5.75E-91  |
| MT1G    | 60.748  | 259.717 | -2.078 | 1.85E-17  |
| IRF1    | 41.821  | 5.33    | 2.758  | 2.57E-79  |
| 6-Sep   | 18.6    | 1.82    | 2.797  | 8.30E-93  |
| PTGER2  | 4.82    | 0.24    | 2.231  | 4.31E-83  |
| PPDPF   | 489.952 | 93.299  | 2.38   | 1.40E-74  |
| FOSB    | 11.3    | 1.27    | 2.438  | 5.87E-28  |
| SNRPD2  | 293.333 | 70.521  | 2.041  | 6.52E-86  |
| RTN2    | 13.45   | 2.14    | 2.202  | 1.72E-100 |
| VASP    | 128.898 | 9.57    | 3.619  | 6.65E-116 |
| SDCBP2  | 76.558  | 6.02    | 3.466  | 3.68E-72  |
| SNRPB   | 161.075 | 29.06   | 2.431  | 2.23E-105 |
| LAMP5   | 15.87   | 0.09    | 3.952  | 5.37E-97  |
| SNRPB2  | 44.09   | 8.97    | 2.177  | 5.34E-108 |
| FAM110A | 11.14   | 1.85    | 2.091  | 1.12E-86  |
| ID1     | 104.437 | 14.88   | 2.731  | 5.54E-67  |
| RALY    | 128.043 | 30.819  | 2.02   | 8.91E-92  |
| ROMO1   | 213.234 | 49.511  | 2.085  | 2.01E-89  |

|         |         |         |        |           |
|---------|---------|---------|--------|-----------|
| PSMB2   | 56.519  | 12.74   | 2.066  | 1.62E-106 |
| RBM42   | 63.848  | 14.67   | 2.049  | 4.39E-96  |
| KIRREL2 | 1.34    | 23.74   | -3.402 | 1.54E-89  |
| HCST    | 20.959  | 1.71    | 3.019  | 4.48E-83  |
| PRDX5   | 342.414 | 80.66   | 2.072  | 1.58E-88  |
| RRAS    | 114.126 | 11.31   | 3.225  | 2.10E-101 |
| GLIS2   | 22.611  | 4.43    | 2.12   | 7.94E-56  |
| IFI6    | 300.765 | 10.41   | 4.725  | 5.85E-99  |
| EVI2A   | 8.8     | 0.43    | 2.777  | 1.05E-75  |
| TRAF2   | 16.32   | 2.78    | 2.196  | 2.16E-104 |
| TSPAN8  | 343.198 | 12.72   | 4.649  | 1.87E-82  |
| KLF2    | 31.051  | 3.85    | 2.724  | 7.40E-69  |
| UQCR11  | 169.494 | 41.489  | 2.005  | 3.20E-93  |
| PKMYT1  | 10.88   | 0.69    | 2.813  | 3.95E-97  |
| TICAM1  | 20.47   | 3.55    | 2.238  | 9.11E-94  |
| TUBA4A  | 91.201  | 12.54   | 2.768  | 5.18E-106 |
| PNKD    | 73.18   | 17.22   | 2.026  | 1.46E-96  |
| SHFM1   | 263.58  | 38.88   | 2.73   | 1.71E-112 |
| PTPN12  | 39.639  | 8.93    | 2.033  | 4.45E-75  |
| POR     | 87.19   | 17.98   | 2.216  | 3.68E-58  |
| FGL2    | 6.92    | 0.72    | 2.203  | 4.66E-59  |
| GNAI1   | 11.8    | 1.85    | 2.167  | 5.06E-79  |
| ZFP36   | 207.231 | 34.26   | 2.562  | 4.55E-50  |
| SRD5A3  | 43.84   | 7.67    | 2.371  | 7.76E-94  |
| YWHAH   | 137.834 | 26.99   | 2.31   | 5.65E-92  |
| MGAT3   | 7.63    | 1.09    | 2.046  | 3.25E-65  |
| TPST2   | 18.4    | 132.064 | -2.778 | 9.31E-78  |
| RAC2    | 52.001  | 1.86    | 4.212  | 1.64E-111 |
| LIF     | 17.771  | 0.58    | 3.57   | 1.87E-83  |
| KRT17   | 295.824 | 0.67    | 7.474  | 1.50E-99  |
| SPECC1  | 15.39   | 2.66    | 2.163  | 1.56E-95  |
| FLNC    | 4.47    | 0.25    | 2.13   | 9.29E-60  |
| TWSG1   | 16.91   | 1.75    | 2.703  | 3.88E-107 |
| ISLR    | 141.925 | 3.04    | 5.145  | 3.67E-109 |
| LOXL1   | 75.609  | 4.1     | 3.909  | 3.13E-113 |
| PALLD   | 89.61   | 5.52    | 3.797  | 4.51E-100 |
| SLC44A2 | 91.982  | 21.029  | 2.078  | 9.71E-77  |
| KLK10   | 69.85   | 0.2     | 5.884  | 5.92E-95  |
| KLK8    | 11.11   | 0       | 3.598  | 9.70E-53  |
| FOXA1   | 3.75    | 0.18    | 2.009  | 9.08E-67  |
| SNX6    | 37.299  | 7.31    | 2.204  | 1.02E-90  |
| NEDD8   | 199.991 | 45.921  | 2.099  | 1.72E-98  |
| KLF16   | 14.91   | 2.25    | 2.291  | 1.45E-107 |
| SAT1    | 545.448 | 110.76  | 2.29   | 1.80E-47  |
| LDLR    | 56.602  | 7.06    | 2.837  | 1.17E-64  |
| PVRL2   | 126.027 | 18.59   | 2.697  | 1.55E-107 |
| KIF1A   | 2.76    | 15.911  | -2.169 | 7.38E-39  |

|          |         |        |       |           |
|----------|---------|--------|-------|-----------|
| LSM7     | 118.217 | 25.419 | 2.174 | 6.04E-78  |
| FCH01    | 5.55    | 0.36   | 2.268 | 2.46E-88  |
| MAP1S    | 33.59   | 5.55   | 2.401 | 7.90E-111 |
| SCO2     | 31.491  | 6.67   | 2.083 | 3.55E-88  |
| PXDN     | 19.79   | 1.47   | 3.073 | 5.16E-86  |
| LSM4     | 102.493 | 22.239 | 2.155 | 2.20E-98  |
| HELZ2    | 17.39   | 3.32   | 2.09  | 2.24E-80  |
| LSP1     | 48.789  | 3.96   | 3.327 | 1.62E-78  |
| GMFG     | 42.801  | 4.06   | 3.114 | 6.73E-85  |
| THEMIS2  | 21.72   | 1.92   | 2.96  | 1.20E-77  |
| SLC6A8   | 30.01   | 6.28   | 2.091 | 2.25E-42  |
| EPS8L1   | 112.61  | 12.16  | 3.11  | 1.35E-51  |
| SH3BGRL  | 84.5    | 17.5   | 2.208 | 6.59E-89  |
| F12      | 7.81    | 1.02   | 2.125 | 5.88E-67  |
| IDO1     | 4.72    | 0.13   | 2.34  | 3.96E-63  |
| PPT1     | 59.482  | 12.05  | 2.212 | 7.26E-88  |
| SH3BP5   | 15.34   | 2.47   | 2.235 | 1.26E-70  |
| RFTN1    | 21.08   | 1.61   | 3.081 | 8.93E-98  |
| SLC6A6   | 23.35   | 1.26   | 3.429 | 8.61E-109 |
| NAPSB    | 13.51   | 0.62   | 3.163 | 3.08E-70  |
| PDLIM4   | 42.591  | 2.2    | 3.768 | 1.90E-102 |
| GFPT2    | 13.66   | 1.76   | 2.409 | 4.48E-49  |
| RAMP2    | 29.25   | 5.38   | 2.245 | 4.24E-74  |
| TMEM204  | 29.41   | 5.62   | 2.2   | 2.88E-65  |
| IL13RA1  | 45.509  | 7.25   | 2.495 | 3.16E-108 |
| TNS4     | 20.559  | 0.06   | 4.346 | 7.04E-86  |
| TOP2A    | 12.43   | 0.18   | 3.509 | 3.73E-120 |
| RARA     | 33.77   | 4.86   | 2.569 | 1.67E-102 |
| RHPN2    | 25.871  | 3.34   | 2.63  | 3.63E-72  |
| LGALS3   | 513.421 | 31.78  | 3.972 | 2.85E-96  |
| PODNL1   | 11.33   | 0.46   | 3.078 | 1.20E-86  |
| MATN3    | 13.46   | 0.17   | 3.627 | 1.70E-84  |
| PPARG    | 20.141  | 0.95   | 3.438 | 6.64E-97  |
| TRIM22   | 29.1    | 5.55   | 2.2   | 2.28E-49  |
| PTPRE    | 8.44    | 0.79   | 2.399 | 2.00E-101 |
| RAN      | 373.664 | 74.31  | 2.315 | 4.33E-87  |
| SERPINF1 | 244.636 | 59.829 | 2.014 | 4.93E-37  |
| JCHAIN   | 85.07   | 1.57   | 5.066 | 4.12E-61  |
| ITGB4    | 207.475 | 7.11   | 4.684 | 1.49E-100 |
| TRIM47   | 54.018  | 7.77   | 2.649 | 4.07E-67  |
| XAF1     | 21.64   | 3.33   | 2.386 | 5.07E-47  |
| MATN2    | 22.98   | 3.62   | 2.376 | 5.20E-70  |
| PCNA     | 54.871  | 12.45  | 2.054 | 2.66E-91  |
| NXT1     | 21.51   | 4.4    | 2.06  | 4.57E-106 |
| NES      | 12.86   | 1.91   | 2.252 | 2.86E-74  |
| RAB25    | 155.545 | 27.05  | 2.481 | 2.17E-65  |
| SYT11    | 6.93    | 0.69   | 2.23  | 1.27E-73  |

|          |         |        |        |           |
|----------|---------|--------|--------|-----------|
| VSTM2L   | 20.46   | 0.71   | 3.65   | 2.45E-74  |
| POMP     | 84.529  | 16.81  | 2.264  | 1.45E-115 |
| HMGB1P5  | 52.691  | 11.19  | 2.139  | 3.39E-80  |
| EPSTI1   | 20.031  | 0.64   | 3.681  | 2.94E-104 |
| POSTN    | 148.117 | 0.89   | 6.302  | 3.93E-121 |
| RNF128   | 28.259  | 4.92   | 2.305  | 9.18E-67  |
| SLC39A11 | 25.93   | 5.73   | 2.001  | 6.65E-100 |
| EPHB2    | 7.95    | 1.03   | 2.14   | 2.66E-66  |
| RARRES3  | 111.917 | 3.94   | 4.515  | 1.05E-105 |
| HRASLS2  | 4.88    | 0      | 2.556  | 1.03E-61  |
| MYH11    | 22.811  | 3.42   | 2.43   | 3.30E-42  |
| GIMAP4   | 15.57   | 2.85   | 2.106  | 1.33E-61  |
| MICAL2   | 28.521  | 4.96   | 2.308  | 1.45E-82  |
| TTC9     | 5.97    | 0.46   | 2.255  | 6.06E-86  |
| LOXL2    | 23.88   | 2.19   | 2.963  | 1.85E-84  |
| IRAK2    | 6.1     | 0.57   | 2.177  | 5.20E-80  |
| TSPAN2   | 7.9     | 0.59   | 2.485  | 1.00E-70  |
| PTGFRN   | 54.371  | 8.34   | 2.568  | 6.26E-84  |
| RSAD2    | 6.91    | 0.7    | 2.218  | 5.66E-67  |
| LDHA     | 511.751 | 70.599 | 2.84   | 1.85E-69  |
| SAA2     | 14.79   | 2.05   | 2.372  | 5.28E-26  |
| ERN2     | 35.041  | 0.23   | 4.873  | 8.54E-87  |
| GRP      | 6.51    | 0.2    | 2.646  | 4.74E-44  |
| SPX      | 0.12    | 14.59  | -3.799 | 7.06E-118 |
| FAM127A  | 95.299  | 21.69  | 2.085  | 1.23E-79  |
| PHC2     | 100.663 | 21.05  | 2.205  | 1.66E-83  |
| FADS2    | 21.561  | 3.27   | 2.402  | 6.29E-64  |
| TCN1     | 101.504 | 0.69   | 5.922  | 1.70E-83  |
| UBAC2    | 61.371  | 14.15  | 2.042  | 4.31E-101 |
| KDELC1   | 6.12    | 0.73   | 2.041  | 8.17E-89  |
| ETS1     | 35.49   | 4.45   | 2.743  | 6.07E-85  |
| NREP     | 46.122  | 2.65   | 3.69   | 7.20E-117 |
| OSTF1    | 41.63   | 7.02   | 2.41   | 1.98E-107 |
| TMEM2    | 49.121  | 9.45   | 2.262  | 4.43E-73  |
| GOLM1    | 130.779 | 14.39  | 3.098  | 6.87E-100 |
| PSAT1    | 4.41    | 21.58  | -2.061 | 7.39E-51  |
| HAVCR2   | 7.66    | 0.57   | 2.464  | 3.53E-71  |
| SDS      | 6.69    | 0.23   | 2.644  | 4.52E-66  |
| OASL     | 11.54   | 0.13   | 3.472  | 3.25E-95  |
| TES      | 44.581  | 9      | 2.188  | 1.04E-81  |
| MDFIC    | 11.9    | 1.45   | 2.397  | 8.27E-78  |
| NT5E     | 16.29   | 0.57   | 3.461  | 8.40E-113 |
| PRR5L    | 11.69   | 0.6    | 2.988  | 4.16E-105 |
| LMO2     | 13.42   | 2.33   | 2.114  | 6.23E-73  |
| GLS2     | 1.55    | 20.21  | -3.056 | 1.02E-81  |
| TROAP    | 6.49    | 0.3    | 2.526  | 1.48E-92  |
| KRT7     | 517.924 | 29.1   | 4.108  | 6.49E-63  |

|          |         |         |       |           |
|----------|---------|---------|-------|-----------|
| GNS      | 48.87   | 8.91    | 2.331 | 4.58E-99  |
| KCNK1    | 30.96   | 1.77    | 3.528 | 1.06E-108 |
| NTPCR    | 48.04   | 11.21   | 2.006 | 8.24E-93  |
| STX6     | 13.01   | 1.59    | 2.435 | 1.31E-126 |
| NPL      | 9.65    | 1.34    | 2.186 | 7.97E-77  |
| LAMC1    | 51.161  | 8.77    | 2.417 | 1.76E-78  |
| ITM2C    | 123.493 | 19.601  | 2.595 | 6.91E-95  |
| SERPINE2 | 32.69   | 1.63    | 3.679 | 2.20E-87  |
| WNT10A   | 5.06    | 0.03    | 2.557 | 5.67E-69  |
| PLXNC1   | 5.56    | 0.55    | 2.081 | 6.34E-75  |
| VILL     | 51.951  | 1.51    | 4.399 | 8.64E-105 |
| FLNB     | 172.373 | 38.539  | 2.133 | 2.08E-58  |
| LRCH1    | 10.65   | 1.45    | 2.249 | 9.67E-106 |
| LMO7     | 88.738  | 13.25   | 2.655 | 3.60E-89  |
| SCEL     | 5.29    | 0.07    | 2.555 | 9.53E-65  |
| ITM2B    | 886.943 | 142.468 | 2.63  | 6.46E-99  |
| LCP1     | 33.261  | 2.08    | 3.476 | 3.70E-79  |
| GPNMB    | 89.393  | 4.46    | 4.049 | 2.00E-82  |
| RAC1     | 288.314 | 42.949  | 2.719 | 3.29E-109 |
| TTYH3    | 46.859  | 3.37    | 3.453 | 4.81E-107 |
| LIMD2    | 19.8    | 3.11    | 2.339 | 1.64E-60  |
| RTP4     | 11.8    | 0.79    | 2.838 | 6.57E-102 |
| MRPL47   | 34.401  | 6.25    | 2.288 | 1.82E-119 |
| GALNT5   | 8.6     | 0.01    | 3.249 | 1.36E-93  |
| SKIL     | 18.43   | 2.2     | 2.602 | 4.72E-93  |
| HLX      | 11.89   | 1.75    | 2.229 | 7.69E-75  |
| IL1RN    | 34.51   | 0.39    | 4.675 | 5.08E-101 |
| LRRC8A   | 46.52   | 6.59    | 2.646 | 7.01E-92  |
| TXN      | 274.05  | 44.649  | 2.591 | 5.84E-99  |
| KLF4     | 27.41   | 3.13    | 2.782 | 3.84E-87  |
| PIM1     | 33.779  | 6.35    | 2.242 | 1.08E-52  |
| TFAP2A   | 5.75    | 0.14    | 2.566 | 1.64E-85  |
| HMGA1    | 149.075 | 11.51   | 3.585 | 3.31E-110 |
| IER3     | 133.972 | 25.591  | 2.344 | 7.75E-44  |
| FGFBP1   | 4.09    | 0.11    | 2.197 | 6.07E-53  |
| SYTL2    | 27.1    | 2.02    | 3.218 | 5.87E-96  |
| LRRC32   | 59.05   | 6.01    | 3.099 | 2.90E-95  |
| SULF1    | 123.356 | 1.14    | 5.861 | 6.95E-118 |
| SDCBP    | 131.279 | 24.55   | 2.372 | 3.92E-88  |
| SORL1    | 13.26   | 2.07    | 2.216 | 1.24E-79  |
| TMPRSS4  | 136.305 | 0.08    | 6.99  | 1.29E-129 |
| MMP7     | 794.938 | 20.11   | 5.237 | 4.58E-61  |
| YAP1     | 30.63   | 5.65    | 2.25  | 2.23E-68  |
| TRIM29   | 99.85   | 0.75    | 5.849 | 1.18E-94  |
| THBS1    | 87.111  | 12.01   | 2.76  | 2.46E-38  |
| NUSAP1   | 10.83   | 0.61    | 2.877 | 3.03E-104 |
| ITGA11   | 9.23    | 0.34    | 2.933 | 1.35E-77  |

|          |         |         |        |           |
|----------|---------|---------|--------|-----------|
| PLCB2    | 12.55   | 2.05    | 2.151  | 2.63E-42  |
| STRA6    | 14.03   | 0.09    | 3.785  | 5.21E-97  |
| GCHFR    | 30.969  | 5.1     | 2.39   | 6.12E-87  |
| IFI44L   | 9.02    | 0.48    | 2.759  | 2.73E-57  |
| IFI44    | 30.909  | 3.54    | 2.813  | 4.89E-46  |
| IFT172   | 53.69   | 9.17    | 2.427  | 3.60E-80  |
| TRIM54   | 3.87    | 0.14    | 2.095  | 2.58E-55  |
| MYOF     | 54.33   | 3.02    | 3.783  | 1.88E-106 |
| ENTPD1   | 15.67   | 1.06    | 3.017  | 1.07E-102 |
| ITGAV    | 39.829  | 6.47    | 2.45   | 1.08E-72  |
| SLC40A1  | 71.639  | 14.46   | 2.232  | 5.99E-64  |
| GUCA1C   | 0       | 12.26   | -3.729 | 3.63E-93  |
| TMOD3    | 17.99   | 3       | 2.247  | 2.76E-87  |
| SHF      | 8.32    | 0.92    | 2.279  | 8.77E-98  |
| SEMA7A   | 20.43   | 0.37    | 3.967  | 2.03E-95  |
| RASGEF1B | 7.08    | 0.61    | 2.327  | 8.64E-105 |
| NAAA     | 16.61   | 3.06    | 2.117  | 4.33E-85  |
| G3BP2    | 43.251  | 10.02   | 2.006  | 5.48E-87  |
| 11-Sep   | 40.201  | 6.8     | 2.401  | 1.12E-84  |
| SHROOM3  | 19.2    | 1.88    | 2.81   | 3.67E-97  |
| LEF1     | 17.74   | 0.31    | 3.838  | 2.73E-111 |
| PPP3CA   | 17.95   | 2.86    | 2.296  | 2.86E-113 |
| RGS3     | 55.008  | 11.04   | 2.218  | 1.80E-84  |
| PARVG    | 11.54   | 1.96    | 2.083  | 8.72E-42  |
| ERP27    | 5.06    | 131.789 | -4.454 | 1.02E-67  |
| GLIPR1   | 16      | 1.32    | 2.873  | 4.47E-75  |
| PHLDA1   | 28.291  | 3.8     | 2.609  | 5.24E-86  |
| LUM      | 974.352 | 25.751  | 5.188  | 2.49E-99  |
| SNRPF    | 31.34   | 6.85    | 2.043  | 1.10E-109 |
| SLC39A5  | 6.1     | 174.876 | -4.631 | 5.87E-83  |
| LPAR6    | 20.129  | 3.2     | 2.331  | 6.97E-78  |
| RHOF     | 18.87   | 1.43    | 3.032  | 2.26E-96  |
| FRMD6    | 15.03   | 1.64    | 2.602  | 3.65E-77  |
| GCNT3    | 61.362  | 0.32    | 5.562  | 3.45E-106 |
| GTF2A2   | 89.759  | 17.579  | 2.288  | 9.03E-111 |
| SRP14    | 337.419 | 79.362  | 2.074  | 5.36E-87  |
| TSPAN3   | 340.78  | 46.449  | 2.849  | 3.97E-101 |
| PML      | 52.399  | 7.26    | 2.693  | 1.18E-101 |
| PCSK6    | 7.58    | 1.12    | 2.017  | 1.94E-66  |
| HAPLN3   | 15.94   | 0.66    | 3.351  | 8.08E-93  |
| MFGE8    | 114.761 | 19.38   | 2.506  | 9.62E-65  |
| IQGAP1   | 102.593 | 20.45   | 2.272  | 1.83E-89  |
| ITGAX    | 10.05   | 1.2     | 2.329  | 4.57E-47  |
| TGFB1I1  | 36.481  | 3.75    | 2.98   | 1.44E-88  |
| IGSF6    | 5.13    | 0.29    | 2.248  | 1.85E-70  |
| NLRC5    | 16.511  | 2.88    | 2.174  | 1.04E-62  |
| MAP1LC3B | 49.98   | 11.59   | 2.018  | 4.65E-90  |

|          |         |         |        |           |
|----------|---------|---------|--------|-----------|
| IRF8     | 13.3    | 1.17    | 2.72   | 1.08E-70  |
| KSR1     | 13.23   | 56.032  | -2.003 | 1.56E-57  |
| SKAP1    | 12.31   | 1.77    | 2.265  | 7.34E-63  |
| GALNT1   | 28.23   | 6.21    | 2.019  | 5.54E-91  |
| TMC6     | 46.32   | 8.67    | 2.291  | 2.02E-57  |
| SLC16A3  | 101.293 | 1.89    | 5.146  | 3.76E-120 |
| SECTM1   | 11.35   | 1.2     | 2.489  | 2.87E-62  |
| PMAIP1   | 4.92    | 0.3     | 2.187  | 3.18E-87  |
| ERBB2    | 68.09   | 16.14   | 2.011  | 1.22E-52  |
| IGFBP4   | 399.845 | 51.99   | 2.919  | 5.97E-78  |
| FKBP10   | 66.87   | 7.66    | 2.97   | 2.14E-86  |
| PPAP2C   | 108.352 | 13.81   | 2.884  | 2.52E-62  |
| VAV1     | 8.25    | 0.45    | 2.673  | 5.39E-82  |
| IFITM3   | 974.149 | 176.093 | 2.461  | 6.13E-51  |
| SOD1     | 235.502 | 42.801  | 2.433  | 5.51E-103 |
| SAE1     | 53.039  | 10.96   | 2.176  | 2.27E-106 |
| TM4SF5   | 19.59   | 0.16    | 4.15   | 3.39E-88  |
| RCN3     | 54.518  | 4.73    | 3.276  | 3.05E-85  |
| MMEL1    | 11.81   | 0.98    | 2.694  | 2.87E-62  |
| PADI1    | 7.34    | 0.02    | 3.031  | 1.45E-49  |
| EPHA2    | 49.439  | 3.77    | 3.403  | 2.62E-77  |
| PGD      | 72.218  | 12.82   | 2.405  | 2.19E-100 |
| SH3BGRL3 | 316.946 | 46.15   | 2.753  | 3.93E-94  |
| IL22RA1  | 12.11   | 64.4    | -2.319 | 1.01E-51  |
| EVA1B    | 22.95   | 4.34    | 2.165  | 2.95E-57  |
| HSPG2    | 127.937 | 16.62   | 2.871  | 1.53E-85  |
| PRKACB   | 19.09   | 3.01    | 2.325  | 2.96E-85  |
| TINAGL1  | 101.75  | 14.96   | 2.687  | 5.65E-68  |
| KIF2C    | 4.56    | 0.19    | 2.224  | 2.01E-103 |
| LMO4     | 72.458  | 11.05   | 2.608  | 1.63E-80  |
| PSMA5    | 64.641  | 14.99   | 2.037  | 7.78E-96  |
| TMC01    | 105.843 | 19.81   | 2.36   | 3.93E-114 |
| MGST3    | 178.267 | 40.559  | 2.109  | 1.21E-91  |
| PVRL4    | 20.72   | 1.66    | 3.029  | 3.29E-68  |
| FCGR2A   | 29.25   | 2.46    | 3.128  | 8.55E-67  |
| NUF2     | 3.63    | 0.11    | 2.06   | 1.49E-102 |
| RGS5     | 38.961  | 6.12    | 2.489  | 3.28E-67  |
| PFDN2    | 109.212 | 16.66   | 2.642  | 5.16E-113 |
| HDGF     | 195.998 | 38.191  | 2.33   | 3.32E-93  |
| RGS16    | 12.79   | 2.25    | 2.085  | 7.58E-53  |
| HMCN1    | 5.5     | 0.29    | 2.333  | 5.27E-52  |
| TPM3     | 276.224 | 39.78   | 2.765  | 3.67E-105 |
| SLC39A1  | 103.838 | 17.56   | 2.498  | 1.86E-96  |
| SCCPDH   | 34.279  | 6.6     | 2.215  | 2.27E-106 |
| MBOAT2   | 19.51   | 0.96    | 3.387  | 5.40E-113 |
| PLEKHA6  | 20.559  | 3.46    | 2.273  | 2.60E-82  |
| REG3G    | 7.8     | 605.254 | -6.106 | 1.48E-38  |



|          |          |        |        |           |
|----------|----------|--------|--------|-----------|
| SNRPG    | 108.052  | 23.1   | 2.178  | 1.48E-100 |
| MALL     | 64.368   | 1.35   | 4.798  | 4.68E-118 |
| RALB     | 49.841   | 7.16   | 2.639  | 1.04E-113 |
| VGLL4    | 41.76    | 9.39   | 2.041  | 2.89E-78  |
| OSBPL10  | 8.49     | 0.55   | 2.614  | 8.42E-113 |
| NR1I2    | 3.72     | 0.13   | 2.062  | 5.85E-49  |
| NCEH1    | 11.57    | 1.48   | 2.342  | 4.52E-84  |
| TMEM44   | 15.899   | 2.43   | 2.301  | 1.96E-94  |
| MUC4     | 10.2     | 0.36   | 3.042  | 2.57E-53  |
| OCIAD2   | 215.582  | 14.55  | 3.8    | 9.63E-134 |
| PLAC8    | 65.721   | 0.5    | 5.475  | 1.52E-116 |
| SNCA     | 5.96     | 0.74   | 2      | 6.49E-58  |
| SFRP2    | 351.114  | 5.74   | 5.707  | 1.62E-82  |
| PDGFC    | 25.96    | 4.48   | 2.299  | 7.38E-55  |
| GZMA     | 7.96     | 0.32   | 2.763  | 3.03E-79  |
| PAM      | 144.908  | 26.591 | 2.403  | 1.55E-78  |
| RNF145   | 45.981   | 6.59   | 2.63   | 2.87E-101 |
| ZMAT2    | 68.559   | 14.89  | 2.13   | 6.64E-104 |
| PLA2G7   | 5.54     | 0.11   | 2.559  | 3.87E-74  |
| TNFRSF21 | 71.421   | 4.44   | 3.735  | 1.38E-115 |
| PPP1R18  | 60.951   | 6.07   | 3.131  | 2.12E-88  |
| NFKBIE   | 21.31    | 2.48   | 2.681  | 2.12E-98  |
| TPBG     | 17.08    | 2.9    | 2.213  | 1.03E-74  |
| SLC22A3  | 6.21     | 0.19   | 2.599  | 3.10E-82  |
| IGFBP3   | 260.113  | 4.18   | 5.656  | 2.87E-122 |
| TRIM50   | 0.16     | 11.04  | -3.376 | 7.08E-108 |
| SH3KBP1  | 26.44    | 1.28   | 3.589  | 7.12E-139 |
| MSN      | 135.213  | 11.97  | 3.393  | 1.99E-89  |
| SNX12    | 35.631   | 7.69   | 2.076  | 1.56E-111 |
| IL2RG    | 61.422   | 0.75   | 5.157  | 4.52E-117 |
| NSDHL    | 19.721   | 4.16   | 2.006  | 1.77E-113 |
| ZNF185   | 11.91    | 1.08   | 2.634  | 1.56E-87  |
| MAL2     | 118.767  | 11.55  | 3.255  | 3.90E-92  |
| FAM83A   | 7.8      | 0.02   | 3.109  | 1.08E-58  |
| SLC39A4  | 77.288   | 10.8   | 2.73   | 6.23E-73  |
| NAPRT    | 92.558   | 16.14  | 2.448  | 4.29E-49  |
| STOM     | 73.16    | 11.1   | 2.616  | 3.27E-84  |
| GSN      | 407.54   | 46.099 | 3.117  | 5.96E-100 |
| PTGES    | 18.41    | 0.42   | 3.773  | 2.72E-93  |
| LCN2     | 1033.769 | 14.86  | 6.028  | 1.18E-71  |
| MSRB2    | 38.08    | 3.86   | 3.007  | 3.91E-122 |
| ZEB1     | 11.79    | 1.59   | 2.304  | 1.46E-69  |
| MKI67    | 7.93     | 0.09   | 3.034  | 3.08E-111 |
| GSTO1    | 151.239  | 29.931 | 2.299  | 2.21E-99  |
| ITPRIP   | 14.09    | 1.71   | 2.477  | 1.10E-89  |
| RGS10    | 44.811   | 2.03   | 3.918  | 6.77E-124 |
| SYT8     | 42.121   | 7.73   | 2.304  | 1.29E-20  |

|          |          |         |        |           |
|----------|----------|---------|--------|-----------|
| SERPING1 | 450.161  | 110.506 | 2.017  | 1.16E-36  |
| SLC43A1  | 10.15    | 78.248  | -2.829 | 7.41E-88  |
| SERPINH1 | 191.114  | 11.2    | 3.977  | 1.73E-105 |
| P4HA3    | 4.2      | 0.16    | 2.164  | 2.55E-62  |
| ST14     | 130.119  | 20.78   | 2.59   | 9.76E-76  |
| FEZ1     | 10.69    | 1.3     | 2.346  | 5.54E-85  |
| MPZL2    | 43.849   | 6.19    | 2.641  | 2.77E-64  |
| TAGLN    | 844.877  | 72.368  | 3.527  | 2.57E-71  |
| KIAA1755 | 5.4      | 0.47    | 2.122  | 7.90E-76  |
| GPHA2    | 0.2      | 21.029  | -4.198 | 4.35E-63  |
| FERMT3   | 28.271   | 2.39    | 3.11   | 1.57E-84  |
| PLCB3    | 20.7     | 3.35    | 2.319  | 3.13E-88  |
| PPP4C    | 103.4    | 19.71   | 2.334  | 3.97E-105 |
| ITGB1    | 364.986  | 36.41   | 3.29   | 3.15E-100 |
| FCGR1A   | 16.151   | 1.05    | 3.065  | 7.13E-79  |
| HNMT     | 53.341   | 10.29   | 2.267  | 1.41E-69  |
| PDCD4    | 82.761   | 357.747 | -2.099 | 2.26E-53  |
| VEGFC    | 6.1      | 0.53    | 2.214  | 8.98E-87  |
| PRSS23   | 60.951   | 5.85    | 3.177  | 2.41E-97  |
| IL18     | 42.32    | 4.68    | 2.931  | 6.39E-81  |
| UBC      | 1175.451 | 228.998 | 2.355  | 1.92E-84  |
| MAT1A    | 0.56     | 8.91    | -2.667 | 2.39E-99  |
| NDUFC2   | 198.445  | 46.869  | 2.059  | 1.84E-101 |
| EPS8     | 38.641   | 5.74    | 2.556  | 1.24E-78  |
| MFSD6    | 22.62    | 4.34    | 2.145  | 1.80E-98  |
| TMEM45B  | 23.271   | 0.43    | 4.085  | 1.76E-110 |
| SPOCK1   | 12.46    | 1.86    | 2.235  | 3.69E-48  |
| XRCC4    | 7.81     | 1.03    | 2.118  | 7.12E-96  |
| TMEM123  | 94.549   | 19.9    | 2.193  | 5.35E-77  |
| GJA1     | 36.569   | 3.11    | 3.192  | 2.53E-83  |
| PELO     | 14.1     | 2.75    | 2.01   | 1.32E-110 |
| SLC16A12 | 0.72     | 7.83    | -2.36  | 1.72E-52  |
| GGPS1    | 25.701   | 5.52    | 2.034  | 1.70E-110 |
| MR1      | 13.1     | 1.26    | 2.641  | 1.42E-113 |
| PLA2R1   | 5.12     | 0.33    | 2.202  | 2.10E-97  |
| RBMS1    | 26.99    | 4.46    | 2.358  | 3.61E-75  |
| FAM49B   | 36.46    | 6.9     | 2.245  | 1.13E-91  |
| THY1     | 179.606  | 4.94    | 4.926  | 2.06E-102 |
| TDH      | 0.1      | 5.17    | -2.488 | 1.37E-84  |
| SH3RF1   | 13.3     | 2.32    | 2.107  | 7.42E-90  |
| MAGED4   | 6.55     | 0.62    | 2.22   | 2.82E-56  |
| PDLIM3   | 38.81    | 5.65    | 2.582  | 2.55E-52  |
| TCEB1    | 67.949   | 15.14   | 2.095  | 1.88E-101 |
| LY96     | 18.56    | 1.2     | 3.152  | 2.78E-87  |
| WNT7A    | 3.07     | 0.01    | 2.011  | 3.05E-51  |
| FGD5     | 13.12    | 1.24    | 2.656  | 5.25E-94  |
| VOPP1    | 63.092   | 8.01    | 2.831  | 1.46E-125 |

|           |         |        |        |           |
|-----------|---------|--------|--------|-----------|
| PROM2     | 29.14   | 5.66   | 2.178  | 8.20E-32  |
| PI4K2A    | 13.15   | 2.17   | 2.158  | 1.43E-110 |
| MARVELD1  | 36.959  | 2.63   | 3.386  | 5.13E-113 |
| SAMSN1    | 6.01    | 0.58   | 2.149  | 1.65E-59  |
| RHOC      | 435.732 | 47.98  | 3.156  | 2.66E-101 |
| SLC16A1   | 12.01   | 0.77   | 2.878  | 2.34E-110 |
| SLC7A7    | 28.919  | 2.43   | 3.125  | 2.10E-94  |
| VSIG4     | 20.77   | 3.97   | 2.131  | 1.31E-34  |
| FZD7      | 7.09    | 0.54   | 2.393  | 2.02E-88  |
| SLA       | 10.51   | 1.31   | 2.317  | 1.53E-50  |
| MCU       | 28.259  | 3.79   | 2.611  | 1.80E-99  |
| FUT6      | 12.42   | 0.98   | 2.761  | 4.22E-72  |
| PCDH1     | 48.08   | 5.15   | 2.996  | 7.56E-93  |
| HKDC1     | 16.71   | 2.39   | 2.385  | 1.37E-54  |
| HK1       | 44.811  | 4.47   | 3.066  | 8.91E-114 |
| UBE2L6    | 80.258  | 8.32   | 3.124  | 3.13E-98  |
| NPTN      | 93.422  | 22.529 | 2.005  | 1.82E-76  |
| FBXO32    | 39.59   | 3.28   | 3.245  | 1.04E-88  |
| TMEM171   | 5       | 0.18   | 2.346  | 7.63E-84  |
| NECAP2    | 53.619  | 9.57   | 2.369  | 5.83E-97  |
| MMP14     | 226.944 | 13.27  | 3.998  | 9.56E-94  |
| TMED6     | 3.29    | 47.408 | -3.496 | 4.80E-59  |
| MYO1E     | 70.869  | 5.69   | 3.425  | 1.03E-111 |
| ETS2      | 55.05   | 6.81   | 2.843  | 2.68E-83  |
| TSPAN18   | 6.31    | 0.55   | 2.238  | 5.13E-79  |
| MX1       | 38.051  | 3.77   | 3.033  | 3.41E-77  |
| PSMG3     | 50.348  | 9.82   | 2.247  | 7.97E-100 |
| FAM213B   | 36.121  | 3.32   | 3.103  | 2.96E-111 |
| SLC30A2   | 2.2     | 31.089 | -3.326 | 3.77E-60  |
| MRPL17    | 61.55   | 13.88  | 2.072  | 6.34E-112 |
| NCK1      | 23.46   | 5.02   | 2.023  | 3.84E-80  |
| GPR153    | 7.97    | 0.49   | 2.59   | 1.19E-98  |
| RHBDL2    | 8.78    | 0.21   | 3.015  | 8.71E-105 |
| HIST1H2BD | 22.38   | 2.94   | 2.569  | 5.62E-54  |
| NCF1      | 6.53    | 0.59   | 2.244  | 1.22E-53  |
| TAGLN2    | 788.244 | 97.998 | 2.995  | 3.95E-89  |
| SLAMF8    | 9.61    | 0.61   | 2.72   | 1.14E-77  |
| SLC45A3   | 12.32   | 0.44   | 3.209  | 5.35E-99  |
| NBL1      | 256.906 | 8.03   | 4.836  | 4.20E-132 |
| F11R      | 73.832  | 15.39  | 2.191  | 3.37E-74  |
| FCER1G    | 90.421  | 7.83   | 3.372  | 1.70E-71  |
| IFNAR2    | 21.84   | 3.64   | 2.299  | 1.20E-97  |
| IFNGR2    | 100.551 | 11.34  | 3.041  | 2.12E-113 |
| LAD1      | 167.369 | 21.021 | 2.935  | 2.67E-64  |
| STC1      | 12.77   | 1.04   | 2.755  | 1.06E-75  |
| RUNX1     | 29.311  | 1.32   | 3.708  | 3.42E-108 |
| PTMS      | 347.651 | 62.621 | 2.454  | 6.37E-85  |

|          |         |        |        |           |
|----------|---------|--------|--------|-----------|
| HK2      | 19.3    | 0.78   | 3.512  | 1.41E-99  |
| SPON2    | 95.14   | 9.66   | 3.173  | 1.70E-76  |
| TPPP3    | 46.179  | 5.34   | 2.896  | 2.59E-70  |
| ZYX      | 152.979 | 30.73  | 2.279  | 1.54E-69  |
| TFF3     | 201.396 | 3.43   | 5.514  | 2.34E-74  |
| TFF2     | 138.169 | 0.51   | 6.526  | 1.23E-73  |
| TFF1     | 481.702 | 0.29   | 8.548  | 6.92E-86  |
| TMPRSS3  | 26.811  | 2.6    | 2.95   | 1.54E-75  |
| SLC37A1  | 18.77   | 2.62   | 2.449  | 3.24E-102 |
| CBS      | 2.92    | 66.921 | -4.115 | 1.38E-98  |
| G6PD     | 26.999  | 5.84   | 2.033  | 2.36E-93  |
| ITGB2    | 61.46   | 3.25   | 3.877  | 3.39E-85  |
| S100B    | 11.07   | 1.5    | 2.271  | 2.56E-53  |
| LMNA     | 319.86  | 33.291 | 3.226  | 1.22E-113 |
| LY6E     | 395.764 | 19.74  | 4.258  | 2.24E-98  |
| ORAI2    | 11.71   | 2.06   | 2.054  | 9.95E-87  |
| MGAT4B   | 165.891 | 31.15  | 2.376  | 1.06E-82  |
| PSMC2    | 46.562  | 10.83  | 2.007  | 1.33E-99  |
| NPHS1    | 0.42    | 11.61  | -3.151 | 1.86E-120 |
| PLXDC1   | 12.87   | 1.92   | 2.248  | 3.47E-70  |
| ITGA5    | 57.229  | 8.36   | 2.637  | 5.15E-68  |
| ZNF385A  | 13.74   | 1.33   | 2.661  | 1.57E-93  |
| PLCD3    | 41.581  | 2.52   | 3.597  | 3.89E-102 |
| FMNL3    | 9.25    | 1.13   | 2.267  | 1.48E-82  |
| RACGAP1  | 8.79    | 0.78   | 2.459  | 2.75E-115 |
| SPC24    | 3.9     | 0.18   | 2.054  | 5.89E-97  |
| TNFSF13  | 51.118  | 11.15  | 2.101  | 9.09E-72  |
| FLYWCH2  | 27.779  | 5.19   | 2.217  | 4.46E-106 |
| ZG16B    | 42.449  | 0.41   | 4.946  | 2.40E-87  |
| RPS6KA4  | 27.959  | 5.62   | 2.129  | 1.19E-89  |
| PDZK1IP1 | 217.82  | 35.68  | 2.577  | 1.91E-37  |
| FBLIM1   | 60.748  | 13.24  | 2.116  | 5.48E-74  |
| PDPN     | 22.201  | 1.92   | 2.99   | 1.21E-71  |
| LAPTM5   | 124.507 | 6.22   | 4.12   | 1.53E-89  |
| SDC3     | 19.43   | 2.53   | 2.533  | 4.65E-92  |
| MXRA8    | 160.096 | 9.95   | 3.879  | 8.23E-91  |
| FAM102B  | 7.3     | 1.07   | 2.003  | 7.32E-83  |
| HENMT1   | 7.94    | 0.52   | 2.556  | 1.47E-108 |
| GBP2     | 71.14   | 3.58   | 3.977  | 3.48E-110 |
| GBP4     | 11.51   | 0.75   | 2.838  | 1.37E-99  |
| VCAM1    | 20.941  | 3.19   | 2.389  | 2.90E-44  |
| PEA15    | 117.759 | 16.31  | 2.778  | 6.44E-103 |
| OLFML2B  | 32.561  | 0.53   | 4.455  | 3.68E-112 |
| IER5     | 10.78   | 1.94   | 2.002  | 3.69E-86  |
| KIF26B   | 4.84    | 0.1    | 2.408  | 8.30E-94  |
| PM20D1   | 0.39    | 27.429 | -4.354 | 5.53E-75  |
| PKDCC    | 63.672  | 13.6   | 2.147  | 4.03E-51  |

|          |          |          |        |           |
|----------|----------|----------|--------|-----------|
| PIGR     | 104.047  | 3.5      | 4.545  | 4.66E-59  |
| FRZB     | 10.35    | 0.81     | 2.649  | 1.16E-73  |
| H3F3A    | 614.853  | 122.93   | 2.313  | 1.10E-89  |
| SGCB     | 15.88    | 2.14     | 2.426  | 8.34E-107 |
| SGPP2    | 19.251   | 1.03     | 3.318  | 5.06E-101 |
| PDLIM5   | 34.621   | 7.29     | 2.103  | 3.03E-91  |
| SCNM1    | 43.419   | 9.95     | 2.02   | 7.78E-97  |
| S100A11  | 2034.84  | 81.509   | 4.625  | 8.47E-100 |
| S100A9   | 65.94    | 14.44    | 2.116  | 2.34E-26  |
| TGFA     | 12.56    | 1.94     | 2.205  | 1.31E-68  |
| PBXIP1   | 74.299   | 13.13    | 2.414  | 7.23E-102 |
| IGFN1    | 0.3      | 8.2      | -2.823 | 1.61E-91  |
| FSTL1    | 100.642  | 8.02     | 3.494  | 4.85E-85  |
| IGFBP7   | 779.172  | 97.092   | 2.992  | 2.36E-81  |
| IHH      | 6.03     | 0.02     | 2.785  | 5.00E-62  |
| FBLN2    | 31.34    | 2.14     | 3.364  | 9.78E-80  |
| PRKCI    | 16.42    | 3.35     | 2.002  | 1.72E-84  |
| MNDA     | 6.68     | 0.62     | 2.245  | 2.79E-54  |
| IFI16    | 83.87    | 6.29     | 3.541  | 1.90E-94  |
| TIPARP   | 16.19    | 3.05     | 2.086  | 6.33E-83  |
| ZDHH3    | 43.03    | 8.84     | 2.162  | 2.17E-94  |
| KLF15    | 2.3      | 18.64    | -2.573 | 7.15E-84  |
| LIPH     | 25.189   | 1.5      | 3.389  | 4.06E-91  |
| RPN1     | 176.974  | 41.191   | 2.077  | 4.57E-98  |
| RPL39L   | 10.38    | 0.76     | 2.693  | 9.80E-82  |
| MFI2     | 18.43    | 2.17     | 2.616  | 2.31E-64  |
| S100P    | 525.737  | 0.28     | 8.685  | 5.85E-109 |
| H2AFZ    | 168.265  | 32.199   | 2.35   | 9.37E-102 |
| SLC9B2   | 13.86    | 0.95     | 2.93   | 6.56E-90  |
| SHISA5   | 135.363  | 23.669   | 2.467  | 2.85E-98  |
| MST1R    | 52.778   | 3.39     | 3.615  | 5.12E-77  |
| POC1A    | 4.48     | 0.34     | 2.032  | 3.00E-112 |
| HMGB2    | 76.378   | 10.31    | 2.774  | 9.21E-98  |
| MAD2L1   | 7.4      | 0.44     | 2.544  | 6.99E-117 |
| HPGD     | 18.85    | 0.34     | 3.889  | 2.31E-98  |
| FAM198B  | 19.76    | 2.27     | 2.666  | 5.36E-82  |
| ITGA2    | 16.67    | 0.38     | 3.679  | 1.17E-114 |
| F2RL2    | 5.48     | 0.24     | 2.386  | 2.74E-71  |
| F2RL1    | 30.271   | 5.05     | 2.37   | 8.89E-71  |
| SPINK1   | 1192.108 | 11822.11 | -3.309 | 5.50E-38  |
| ESM1     | 6.19     | 0.12     | 2.683  | 1.34E-84  |
| GPX8     | 24.8     | 2.1      | 3.057  | 9.62E-99  |
| SERINC5  | 12.63    | 2.35     | 2.025  | 1.48E-86  |
| ERAP2    | 12.28    | 0.96     | 2.76   | 5.33E-43  |
| FOXQ1    | 10.31    | 0.59     | 2.831  | 1.97E-79  |
| TMEM200A | 7.57     | 0.3      | 2.721  | 4.18E-85  |
| GALNT10  | 23.11    | 3.59     | 2.393  | 2.06E-98  |

|           |         |        |        |           |
|-----------|---------|--------|--------|-----------|
| PTTG1     | 26.139  | 0.63   | 4.057  | 6.41E-139 |
| STEAP1    | 22.511  | 2.35   | 2.811  | 5.44E-85  |
| SHH       | 4.38    | 0.04   | 2.371  | 6.35E-75  |
| FNDC1     | 12.98   | 0.34   | 3.383  | 1.88E-82  |
| RAD21     | 48.421  | 10.29  | 2.13   | 4.41E-94  |
| TNFRSF11B | 9       | 0.44   | 2.796  | 1.77E-64  |
| MICALL2   | 48.351  | 9.81   | 2.191  | 3.97E-47  |
| YWHAZ     | 382.84  | 45.959 | 3.031  | 2.22E-105 |
| GEM       | 30.181  | 1.35   | 3.73   | 4.65E-89  |
| LETM2     | 8.11    | 1.18   | 2.063  | 1.37E-70  |
| TRPV6     | 8.21    | 37.801 | -2.075 | 4.49E-36  |
| MELK      | 4.43    | 0.12   | 2.277  | 8.91E-92  |
| SPTSSA    | 22.279  | 4.47   | 2.089  | 1.24E-94  |
| FOLR2     | 15.35   | 1.4    | 2.768  | 3.55E-66  |
| GJB2      | 33.651  | 0.38   | 4.65   | 6.96E-91  |
| REEP3     | 18.33   | 2.65   | 2.405  | 3.48E-99  |
| VSTM4     | 4.56    | 0.39   | 2      | 8.74E-79  |
| PRAP1     | 10.84   | 0.09   | 3.441  | 6.73E-64  |
| IFI27     | 879.536 | 12.63  | 6.014  | 4.13E-123 |
| HTRA1     | 177.785 | 17.94  | 3.239  | 5.86E-92  |
| SPRED1    | 9.21    | 1.29   | 2.157  | 6.67E-98  |
| JAM3      | 16.69   | 2.41   | 2.375  | 2.26E-82  |
| RAB8B     | 9.98    | 1.34   | 2.23   | 6.60E-92  |
| IKBIP     | 10.82   | 1.63   | 2.168  | 3.03E-96  |
| PPP1R14D  | 6.57    | 0.09   | 2.796  | 4.26E-77  |
| SPINT1    | 143.997 | 31.321 | 2.165  | 1.68E-65  |
| FBN1      | 56.578  | 2.7    | 3.96   | 2.50E-90  |
| WBP1L     | 27.99   | 4.93   | 2.289  | 6.17E-100 |
| SERPINB8  | 9.4     | 1.51   | 2.051  | 5.55E-84  |
| RIC3      | 1.96    | 14.47  | -2.386 | 7.16E-70  |
| MFAP4     | 71.56   | 11.19  | 2.573  | 7.42E-47  |
| HDGFRP3   | 14.99   | 2.19   | 2.326  | 6.25E-72  |
| RRAD      | 6.7     | 0.88   | 2.034  | 6.54E-51  |
| FAM96B    | 127.229 | 28.44  | 2.123  | 2.68E-98  |
| MMP10     | 3.33    | 0.05   | 2.044  | 3.16E-50  |
| NNMT      | 422.907 | 24.03  | 4.082  | 3.17E-86  |
| SLFN5     | 7.32    | 0.98   | 2.071  | 1.33E-77  |
| KIAA0101  | 17.54   | 0.89   | 3.294  | 1.54E-108 |
| PLK1      | 11.27   | 0.71   | 2.843  | 1.12E-105 |
| MYO1A     | 4.91    | 0.09   | 2.439  | 1.40E-51  |
| NAB2      | 17.111  | 2.4    | 2.413  | 9.96E-92  |
| YWHAB     | 131.515 | 20.639 | 2.614  | 1.80E-112 |
| GREM1     | 29.4    | 0.59   | 4.257  | 2.83E-70  |
| MS4A7     | 13.33   | 2.11   | 2.204  | 6.73E-48  |
| MS4A8     | 7.23    | 0.64   | 2.327  | 7.81E-46  |
| EVA1C     | 33.4    | 6.63   | 2.173  | 5.04E-79  |
| MEI1      | 6.58    | 0.33   | 2.511  | 6.18E-84  |

|          |         |          |        |           |
|----------|---------|----------|--------|-----------|
| PHB      | 122.734 | 29.761   | 2.008  | 6.35E-101 |
| SNRPD1   | 81.69   | 10.84    | 2.804  | 1.05E-123 |
| TMEM92   | 21.63   | 0.36     | 4.057  | 4.68E-104 |
| FAM102A  | 62.422  | 13.53    | 2.126  | 5.83E-76  |
| PRRX2    | 6.84    | 0.28     | 2.615  | 3.06E-80  |
| UGT1A6   | 3.54    | 0.03     | 2.14   | 2.01E-59  |
| IGF2     | 16.2    | 2.27     | 2.395  | 1.75E-31  |
| TPM4     | 417.056 | 28.01    | 3.849  | 1.61E-108 |
| RAB8A    | 35.579  | 7.51     | 2.104  | 2.03E-101 |
| GPX4     | 349.318 | 54.541   | 2.657  | 5.82E-104 |
| TUBA1A   | 164.073 | 16.06    | 3.274  | 6.35E-82  |
| TUBA1C   | 212.526 | 21.52    | 3.245  | 1.22E-90  |
| SERTAD3  | 31.51   | 3.33     | 2.908  | 1.29E-121 |
| LAIR1    | 19.2    | 2.04     | 2.732  | 6.35E-56  |
| SPINT2   | 622.184 | 103.593  | 2.575  | 2.20E-86  |
| PSCA     | 103.342 | 0.25     | 6.383  | 8.98E-69  |
| LY6D     | 8.04    | 0.28     | 2.82   | 7.84E-37  |
| SLC43A2  | 14.69   | 2.63     | 2.112  | 3.16E-83  |
| KLK1     | 24.06   | 1669.151 | -6.058 | 7.18E-71  |
| KLK6     | 24.96   | 0.03     | 4.656  | 2.57E-76  |
| IGFBP6   | 78.858  | 12.39    | 2.576  | 1.37E-56  |
| EVPL     | 14.47   | 1.07     | 2.902  | 8.45E-74  |
| TK1      | 21.98   | 1.95     | 2.962  | 3.66E-96  |
| KCTD5    | 21.159  | 3.6      | 2.268  | 1.02E-115 |
| FADD     | 16.82   | 3.02     | 2.148  | 8.69E-109 |
| NAALADL1 | 7.79    | 1        | 2.136  | 1.54E-78  |
| SCARA3   | 11.23   | 1.13     | 2.521  | 1.83E-71  |
| PAFAH1B2 | 31.41   | 6.65     | 2.083  | 9.47E-114 |
| NKIRAS2  | 25.679  | 5.45     | 2.048  | 4.04E-108 |
| PTF1A    | 0.03    | 16.829   | -4.114 | 1.49E-99  |
| NT5DC2   | 45.37   | 7.37     | 2.47   | 7.82E-91  |
| MFS2A    | 7.48    | 0.2      | 2.821  | 3.41E-96  |
| TAP1     | 56.92   | 6.49     | 2.951  | 1.69E-91  |
| RHOH     | 4.49    | 0.28     | 2.101  | 5.64E-61  |
| RAB31    | 42.2    | 1.87     | 3.912  | 4.36E-101 |
| SERINC2  | 143.21  | 12.74    | 3.392  | 2.11E-77  |
| LDLRAD4  | 7.58    | 0.75     | 2.294  | 3.94E-92  |
| SLC16A4  | 8.91    | 0.39     | 2.834  | 1.62E-90  |
| IL7R     | 7.61    | 0.67     | 2.366  | 2.33E-46  |
| PKIG     | 44.891  | 9.76     | 2.093  | 9.14E-77  |
| TSPAN5   | 6.93    | 0.46     | 2.441  | 1.17E-101 |
| VAMP5    | 57.34   | 11.34    | 2.241  | 7.87E-85  |
| INPP5D   | 11.2    | 1.26     | 2.433  | 1.85E-41  |
| PPIC     | 64.061  | 11       | 2.439  | 4.39E-84  |
| LGALS9   | 187.194 | 10.15    | 4.077  | 1.54E-97  |
| PXDC1    | 38.791  | 6.42     | 2.423  | 7.46E-84  |
| KLK7     | 20.15   | 0.05     | 4.332  | 6.66E-64  |

|          |          |           |        |           |
|----------|----------|-----------|--------|-----------|
| ROR2     | 6.04     | 0.58      | 2.156  | 9.41E-75  |
| PGM2     | 14.94    | 2.94      | 2.016  | 1.78E-89  |
| GP2      | 19.889   | 13619.63  | -9.349 | 1.33E-75  |
| PTAFR    | 9.5      | 0.49      | 2.817  | 5.89E-97  |
| PTPN9    | 17.93    | 3.34      | 2.125  | 2.11E-101 |
| RNASE6   | 17.67    | 1.64      | 2.822  | 4.21E-69  |
| SPRR1B   | 5.25     | 0.33      | 2.232  | 5.01E-32  |
| TM2D2    | 33.24    | 6.58      | 2.175  | 1.06E-105 |
| PLEKHA2  | 12.77    | 1.55      | 2.433  | 1.81E-64  |
| GPR183   | 9.84     | 0.51      | 2.844  | 1.38E-67  |
| ZEB2     | 10.37    | 1.67      | 2.09   | 1.56E-60  |
| NRG4     | 1.38     | 12.01     | -2.451 | 4.67E-70  |
| LIMS1    | 27.801   | 4.19      | 2.472  | 4.30E-83  |
| PCDH7    | 8.07     | 0.12      | 3.018  | 2.39E-91  |
| ROBO1    | 9.06     | 0.79      | 2.491  | 2.25E-76  |
| MUC3A    | 34.929   | 0.77      | 4.343  | 2.60E-80  |
| ITGAM    | 7.48     | 1.06      | 2.041  | 3.78E-54  |
| TM4SF4   | 206.642  | 16.87     | 3.538  | 2.81E-51  |
| TM4SF1   | 363.194  | 35.54     | 3.317  | 9.92E-65  |
| MYO7B    | 8.81     | 0.34      | 2.872  | 2.20E-56  |
| YWHAG    | 63.61    | 12.14     | 2.298  | 1.80E-100 |
| SLC16A5  | 14.2     | 1.7       | 2.493  | 2.67E-67  |
| FOS      | 235.453  | 57.539    | 2.014  | 3.20E-22  |
| KRT8     | 1440.146 | 274.183   | 2.389  | 2.24E-57  |
| METTL7B  | 12.77    | 0.89      | 2.865  | 2.30E-93  |
| MZB1     | 12.97    | 0.23      | 3.506  | 2.70E-63  |
| PFKFB3   | 35.041   | 5.88      | 2.389  | 1.62E-63  |
| TMC7     | 5.03     | 0.2       | 2.329  | 1.19E-61  |
| SERPINB9 | 7.71     | 0.73      | 2.332  | 5.28E-85  |
| SMAGP    | 34.741   | 6.06      | 2.34   | 3.69E-76  |
| TMEM133  | 4.65     | 0.39      | 2.023  | 2.31E-99  |
| SDR16C5  | 16.4     | 0.08      | 4.01   | 1.95E-99  |
| HTRA3    | 88.658   | 1.91      | 4.945  | 1.68E-109 |
| TMEM43   | 46.96    | 9.94      | 2.132  | 1.74E-83  |
| PLA2G1B  | 13.78    | 15125.549 | -9.999 | 1.86E-68  |
| OSCAR    | 5.43     | 0.37      | 2.231  | 8.03E-68  |
| PAQR8    | 8.4      | 0.49      | 2.657  | 7.05E-100 |
| PKIA     | 3.9      | 0.16      | 2.079  | 2.97E-85  |
| FPR1     | 7.87     | 0.8       | 2.301  | 4.18E-52  |
| FEZ2     | 26.921   | 4.86      | 2.252  | 1.94E-103 |
| FUT3     | 43.131   | 2.81      | 3.534  | 3.78E-70  |
| JUNB     | 197.744  | 39.061    | 2.311  | 2.84E-39  |
| TMEM37   | 24.23    | 4.37      | 2.232  | 2.72E-62  |
| PGAM1    | 160.24   | 29.681    | 2.394  | 1.73E-98  |
| KRT19    | 1456.812 | 15.73     | 6.445  | 1.33E-114 |
| KRT15    | 12.11    | 0.61      | 3.026  | 1.12E-69  |
| HOPX     | 67.958   | 1.52      | 4.774  | 3.17E-111 |



|            |         |           |         |           |
|------------|---------|-----------|---------|-----------|
| RGS19      | 14.72   | 2.83      | 2.037   | 4.17E-76  |
| LGALS4     | 459.206 | 17.03     | 4.674   | 2.65E-64  |
| GATM       | 52.94   | 529.247   | -3.297  | 5.48E-60  |
| RHN01      | 18.03   | 3.67      | 2.027   | 1.30E-109 |
| NINJ2      | 11.21   | 0.48      | 3.044   | 2.74E-102 |
| MLLT3      | 12.25   | 1.35      | 2.495   | 2.40E-105 |
| RRM2       | 11.88   | 0.32      | 3.287   | 3.02E-105 |
| PRNP       | 49.931  | 8.35      | 2.446   | 8.35E-92  |
| PPIH       | 33.121  | 7.27      | 2.045   | 8.03E-103 |
| REG3A      | 87.741  | 810.236   | -3.192  | 5.31E-12  |
| REG1B      | 15.98   | 9666.647  | -9.153  | 6.07E-55  |
| LRRC15     | 3.51    | 0.01      | 2.159   | 1.78E-57  |
| ISG20      | 57.859  | 4.18      | 3.506   | 3.83E-106 |
| TPSAB1     | 39.199  | 5.89      | 2.545   | 1.96E-53  |
| GNG12      | 37.6    | 6.86      | 2.296   | 1.36E-84  |
| RND1       | 7.36    | 0.69      | 2.306   | 2.10E-59  |
| RARG       | 25.621  | 3.46      | 2.577   | 1.63E-92  |
| MYEOV      | 36.39   | 0.92      | 4.283   | 8.77E-75  |
| MYD88      | 36.37   | 6.15      | 2.386   | 4.02E-91  |
| MIR4435-2f | 79.511  | 5.46      | 3.64    | 2.74E-106 |
| PARP14     | 17.48   | 3.52      | 2.032   | 1.19E-73  |
| GLRX       | 37.859  | 4.77      | 2.752   | 9.78E-93  |
| SNCG       | 21.81   | 2.24      | 2.816   | 1.88E-57  |
| PPP1R3B    | 9.8     | 1.44      | 2.146   | 4.85E-85  |
| TRIB1      | 26.58   | 5.55      | 2.074   | 1.31E-66  |
| OLR1       | 12.49   | 0.41      | 3.258   | 4.23E-60  |
| SAA1       | 38.47   | 5.44      | 2.616   | 3.42E-29  |
| LRFN4      | 12      | 1.21      | 2.556   | 8.44E-74  |
| PSMD1      | 51.839  | 9.44      | 2.34    | 8.50E-115 |
| MUC13      | 62.769  | 0.97      | 5.017   | 3.66E-102 |
| JUP        | 198.885 | 22.119    | 3.112   | 1.47E-96  |
| NET1       | 58.801  | 12.95     | 2.1     | 9.18E-70  |
| HOXB2      | 13.19   | 1.49      | 2.511   | 8.94E-80  |
| 3-Mar      | 9.96    | 1.6       | 2.076   | 2.00E-77  |
| XXYLT1     | 7.93    | 1.09      | 2.095   | 3.30E-113 |
| FAM3C2     | 31.811  | 4.47      | 2.585   | 1.48E-66  |
| MSRB3      | 12.85   | 1.37      | 2.547   | 1.69E-71  |
| SELP       | 5.69    | 0.64      | 2.028   | 1.48E-50  |
| PHLDA3     | 56.881  | 8.65      | 2.584   | 3.35E-83  |
| PODN       | 31.8    | 6.61      | 2.108   | 3.29E-41  |
| KIAA1551   | 28.989  | 5.61      | 2.182   | 1.11E-78  |
| UBE2C      | 28.789  | 0.26      | 4.563   | 7.52E-124 |
| SPSB4      | 0.64    | 5.88      | -2.069  | 3.26E-96  |
| MARCKSL1   | 164.073 | 7.64      | 4.256   | 9.92E-124 |
| PNLIP      | 12.66   | 16871.492 | -10.271 | 1.86E-55  |
| UCP2       | 64.128  | 4.4       | 3.592   | 1.95E-102 |
| FOSL1      | 15.99   | 0.43      | 3.571   | 1.31E-87  |

|          |         |          |         |           |
|----------|---------|----------|---------|-----------|
| SUGCT    | 16.42   | 0.58     | 3.463   | 1.35E-81  |
| RMI2     | 7.55    | 0.46     | 2.55    | 3.88E-107 |
| SFN      | 128.604 | 0.54     | 6.395   | 9.87E-121 |
| ETV4     | 17.09   | 2.41     | 2.407   | 2.12E-66  |
| GPX2     | 313.169 | 5.37     | 5.624   | 3.43E-94  |
| HSD11B2  | 20.3    | 3.48     | 2.249   | 1.55E-48  |
| LPCAT4   | 87.462  | 11.05    | 2.876   | 4.33E-82  |
| SLCO3A1  | 16.429  | 2.12     | 2.482   | 5.26E-84  |
| PLA2G16  | 110.921 | 15.61    | 2.752   | 4.87E-94  |
| PRR15    | 21.66   | 1.03     | 3.481   | 6.44E-101 |
| LMNB2    | 17.91   | 3.38     | 2.11    | 2.72E-106 |
| MYO1D    | 47.1    | 10.41    | 2.076   | 2.22E-75  |
| FOXL1    | 6.51    | 0.04     | 2.852   | 2.59E-88  |
| METRNL   | 56.09   | 8.92     | 2.525   | 2.18E-72  |
| TYMS     | 16.88   | 3.24     | 2.076   | 5.40E-85  |
| PNMA1    | 30.33   | 2.46     | 3.179   | 5.26E-121 |
| FUT2     | 27.05   | 3.18     | 2.746   | 8.34E-53  |
| MUC20    | 57.308  | 7.3      | 2.813   | 9.35E-51  |
| FIBIN    | 9.06    | 1.25     | 2.161   | 5.21E-50  |
| RHOG     | 65.231  | 11.38    | 2.419   | 2.43E-100 |
| HIC1     | 7.79    | 1.13     | 2.045   | 4.53E-60  |
| SAMD9L   | 8.52    | 1.09     | 2.187   | 1.20E-72  |
| TGIF1    | 68.711  | 12.77    | 2.34    | 3.69E-71  |
| PTRF     | 95.51   | 9.46     | 3.206   | 6.23E-96  |
| GBA      | 51.929  | 11.78    | 2.05    | 9.03E-111 |
| FAM20C   | 37.361  | 7.26     | 2.215   | 3.91E-75  |
| GRB2     | 54.64   | 11.15    | 2.195   | 6.77E-102 |
| UBE2N    | 61.158  | 12.25    | 2.23    | 4.10E-100 |
| ODF3B    | 32.94   | 6.1      | 2.257   | 9.51E-49  |
| MLF1     | 10.52   | 1.5      | 2.204   | 1.36E-84  |
| KDELC2   | 15.67   | 2.92     | 2.088   | 7.11E-88  |
| PLEC     | 71.988  | 10.01    | 2.729   | 3.02E-85  |
| MAF      | 8.55    | 1.15     | 2.151   | 3.00E-83  |
| GPR35    | 21.07   | 0.55     | 3.832   | 4.52E-98  |
| KCTD12   | 21.01   | 2.43     | 2.682   | 6.55E-83  |
| TMEM52   | 1.93    | 85.407   | -4.882  | 1.08E-108 |
| RNF186   | 1.77    | 14.15    | -2.451  | 2.91E-56  |
| MSC      | 11.38   | 1.34     | 2.403   | 1.17E-60  |
| FAM101A  | 14.21   | 0.1      | 3.789   | 2.57E-105 |
| FBX034   | 15.401  | 2.92     | 2.065   | 8.24E-93  |
| SEPW1    | 431.255 | 74.511   | 2.517   | 3.57E-95  |
| RCC2     | 47.441  | 7.69     | 2.479   | 2.98E-100 |
| FUCA1    | 47.53   | 7.28     | 2.551   | 5.05E-116 |
| HLA-DQB1 | 83.487  | 3.34     | 4.283   | 1.50E-64  |
| VWA1     | 99.098  | 16.979   | 2.477   | 1.20E-64  |
| PCED1B   | 10.13   | 0.91     | 2.543   | 7.49E-89  |
| SYCN     | 4.07    | 5355.478 | -10.045 | 1.12E-69  |

|           |         |        |       |           |
|-----------|---------|--------|-------|-----------|
| FOXS1     | 7.38    | 0.25   | 2.745 | 1.12E-91  |
| MYADM     | 96.763  | 9.75   | 3.185 | 7.24E-101 |
| GPBAR1    | 6.64    | 0.6    | 2.256 | 3.24E-72  |
| SSC5D     | 10.07   | 0.51   | 2.874 | 1.19E-84  |
| TMEM150B  | 3.93    | 0.15   | 2.1   | 1.30E-58  |
| HCLS1     | 28.969  | 5.19   | 2.275 | 8.06E-49  |
| PAK2      | 21.72   | 4.55   | 2.033 | 3.90E-96  |
| HMHA1     | 23.03   | 4.69   | 2.078 | 7.31E-72  |
| HIST1H2AC | 30.3    | 3.37   | 2.84  | 1.61E-72  |
| HIST1H2BC | 5.69    | 0.52   | 2.138 | 7.55E-65  |
| SHISA2    | 4.05    | 0.1    | 2.199 | 2.79E-96  |
| ZDHHC20   | 26.99   | 3.56   | 2.618 | 1.66E-118 |
| LINC01559 | 4.89    | 0      | 2.558 | 3.69E-60  |
| MRPL14    | 52.921  | 8.99   | 2.432 | 6.31E-123 |
| NQ01      | 235.551 | 2.87   | 5.934 | 3.85E-137 |
| HIGD1A    | 77.961  | 16.77  | 2.152 | 8.39E-91  |
| F2R       | 31.86   | 1.22   | 3.888 | 1.48E-108 |
| MUC16     | 7.68    | 0.02   | 3.089 | 2.55E-46  |
| PJA1      | 21.01   | 3.99   | 2.141 | 1.53E-108 |
| HIST3H2A  | 10.63   | 1.45   | 2.247 | 6.83E-78  |
| RAP2B     | 12.84   | 1.28   | 2.602 | 1.14E-118 |
| FDCSP     | 9.14    | 0      | 3.342 | 1.89E-43  |
| PHLDA2    | 44.68   | 1.03   | 4.492 | 5.96E-81  |
| NOP10     | 177.33  | 33.4   | 2.374 | 6.30E-101 |
| TP53TG1   | 33.981  | 5.12   | 2.515 | 6.92E-123 |
| EXT1      | 32.64   | 6.7    | 2.127 | 1.38E-86  |
| TSHZ2     | 10.04   | 1.03   | 2.443 | 7.21E-84  |
| KPNA2     | 30.6    | 3.13   | 2.936 | 1.20E-121 |
| TRAK1     | 31.421  | 4.28   | 2.618 | 5.39E-109 |
| SKA2      | 22.15   | 4.48   | 2.079 | 6.77E-104 |
| NTM       | 18.16   | 0.18   | 4.021 | 2.95E-74  |
| TSKU      | 34.391  | 6.05   | 2.328 | 7.04E-71  |
| VM01      | 5.38    | 0.42   | 2.168 | 2.99E-82  |
| LCK       | 8.98    | 0.35   | 2.886 | 1.00E-83  |
| TCEAL7    | 4.81    | 0.41   | 2.043 | 6.20E-73  |
| HMGN4     | 46.539  | 9.85   | 2.131 | 6.25E-86  |
| GPC6      | 4.5     | 0.18   | 2.221 | 5.23E-82  |
| TMEM119   | 28.24   | 2.17   | 3.205 | 7.27E-71  |
| PTTG1IP   | 208.037 | 29.85  | 2.76  | 7.99E-110 |
| 15-Sep    | 199.424 | 42.78  | 2.195 | 3.39E-93  |
| FHL3      | 28.019  | 5.85   | 2.083 | 4.93E-65  |
| GPR132    | 4.3     | 0.16   | 2.192 | 8.58E-88  |
| MX2       | 15.49   | 1.92   | 2.498 | 3.31E-73  |
| HMCES     | 34.621  | 5.46   | 2.463 | 7.26E-120 |
| UPP1      | 35.981  | 5.24   | 2.567 | 2.90E-84  |
| LHFP      | 28.259  | 4.66   | 2.37  | 4.04E-68  |
| TMEM50A   | 100.349 | 17.881 | 2.424 | 3.43E-105 |

|           |         |          |        |           |
|-----------|---------|----------|--------|-----------|
| ZNF703    | 26      | 3.26     | 2.664  | 6.36E-102 |
| OLFML1    | 7.09    | 0.75     | 2.209  | 5.60E-68  |
| KIRREL    | 12.23   | 1.45     | 2.433  | 3.69E-74  |
| IQGAP3    | 4.8     | 0.07     | 2.438  | 5.90E-91  |
| PTP4A2    | 151.964 | 33.52    | 2.148  | 2.82E-85  |
| PPP1R2    | 32.329  | 6.5      | 2.152  | 2.39E-99  |
| TACSTD2   | 168.826 | 24.96    | 2.71   | 7.30E-35  |
| PKP3      | 62.76   | 13.01    | 2.186  | 1.57E-57  |
| PROS1     | 16.47   | 2.09     | 2.499  | 5.88E-91  |
| SOCS3     | 50.31   | 7.05     | 2.672  | 1.53E-51  |
| LPAR5     | 6.36    | 0.21     | 2.605  | 1.40E-107 |
| TMEM173   | 60.141  | 5.09     | 3.328  | 1.08E-106 |
| 9-Sep     | 144.787 | 14.77    | 3.209  | 3.78E-113 |
| ZBTB7C    | 3.99    | 0.23     | 2.02   | 1.26E-78  |
| SUMO3     | 71.878  | 15.05    | 2.183  | 3.57E-103 |
| FMNL1     | 20.841  | 3.03     | 2.438  | 9.69E-63  |
| USP18     | 8.21    | 1.11     | 2.126  | 2.66E-92  |
| MAFF      | 30.34   | 3.12     | 2.927  | 6.82E-89  |
| SLC24A3   | 5.93    | 0.27     | 2.448  | 9.00E-101 |
| IFITM2    | 452.539 | 69.932   | 2.677  | 1.30E-57  |
| TNFAIP2   | 126.851 | 14.63    | 3.032  | 3.86E-59  |
| WBP5      | 73.93   | 16.7     | 2.082  | 1.90E-82  |
| UBALD2    | 80.61   | 16.01    | 2.262  | 1.82E-83  |
| TCN2      | 26.009  | 4.32     | 2.344  | 6.69E-93  |
| TNFAIP8L1 | 7.28    | 0.99     | 2.057  | 5.07E-103 |
| SMYD3     | 20.75   | 2.67     | 2.567  | 6.53E-129 |
| KRT6B     | 8.37    | 0.17     | 3.002  | 3.46E-53  |
| MUC1      | 777.985 | 97.342   | 2.986  | 1.40E-41  |
| IRF7      | 28.59   | 5.9      | 2.1    | 3.85E-46  |
| PDIA2     | 5.19    | 671.2    | -6.763 | 2.51E-80  |
| IFIT1     | 16.79   | 1.68     | 2.731  | 1.47E-63  |
| MORF4L1   | 216.061 | 51.599   | 2.045  | 1.27E-77  |
| EVI2B     | 10.6    | 0.75     | 2.729  | 1.73E-66  |
| TRIM69    | 15.1    | 1.62     | 2.619  | 9.72E-100 |
| IFITM1    | 223.123 | 28.489   | 2.926  | 1.00E-68  |
| ZNF267    | 8.18    | 1.1      | 2.128  | 2.75E-108 |
| LEMD1     | 15.11   | 0.05     | 3.939  | 6.98E-81  |
| NDUFA13   | 320.015 | 62.171   | 2.345  | 2.97E-107 |
| SAPCD2    | 3.75    | 0.12     | 2.084  | 1.32E-93  |
| THBS2     | 91.512  | 1.61     | 5.147  | 1.08E-102 |
| GNG2      | 7.59    | 1.03     | 2.081  | 4.45E-61  |
| 10-Sep    | 27.07   | 5.44     | 2.124  | 1.68E-82  |
| LILRB4    | 10.82   | 0.59     | 2.894  | 4.68E-71  |
| KRT16     | 28.999  | 0.15     | 4.705  | 1.86E-76  |
| ESPN      | 6.5     | 0.23     | 2.608  | 2.67E-63  |
| PNLIPRP1  | 3       | 3098.812 | -9.598 | 3.37E-84  |
| GCNT1     | 6.02    | 0.48     | 2.246  | 3.59E-80  |

|            |          |         |        |           |
|------------|----------|---------|--------|-----------|
| SESTD1     | 21.88    | 3.65    | 2.299  | 4.35E-83  |
| FPR3       | 7.74     | 0.48    | 2.562  | 3.51E-65  |
| ISG15      | 113.322  | 4.35    | 4.417  | 1.53E-93  |
| TMSB4XP8   | 14.58    | 0       | 3.962  | 4.64E-28  |
| SPRY4      | 13.05    | 1.58    | 2.445  | 2.83E-104 |
| TRPV2      | 17.92    | 2.64    | 2.378  | 4.93E-73  |
| FANCA      | 9.56     | 1.28    | 2.212  | 1.08E-82  |
| TPRG1      | 4.51     | 0.33    | 2.051  | 1.68E-62  |
| UBQLN2     | 16.47    | 3.06    | 2.105  | 6.59E-106 |
| WNT7B      | 5.75     | 0.16    | 2.541  | 5.74E-85  |
| TUBB4B     | 197.156  | 37.809  | 2.352  | 1.39E-91  |
| PLSCR1     | 85.828   | 17.66   | 2.218  | 2.71E-62  |
| SLC38A3    | 1.37     | 17.91   | -2.996 | 1.86E-67  |
| SELL       | 6.68     | 0.26    | 2.608  | 7.69E-62  |
| IER5L      | 12.77    | 1.46    | 2.485  | 6.71E-63  |
| SUMO2      | 267.148  | 50.369  | 2.384  | 1.18E-101 |
| S100A16    | 384.622  | 13.74   | 4.709  | 2.41E-119 |
| SMIM15     | 33.3     | 6.75    | 2.146  | 1.02E-103 |
| PRELP      | 24.54    | 4.18    | 2.302  | 3.21E-44  |
| FAM26F     | 7.96     | 0.53    | 2.55   | 3.27E-73  |
| GJB3       | 28.07    | 0.1     | 4.724  | 1.53E-113 |
| LITAF      | 117.197  | 14.72   | 2.911  | 1.09E-96  |
| HN1        | 233.778  | 7.69    | 4.756  | 4.84E-131 |
| S100A13    | 203.233  | 29.84   | 2.727  | 4.43E-95  |
| GJB5       | 4.7      | 0.08    | 2.4    | 3.35E-52  |
| FAM150B    | 3.17     | 25.63   | -2.675 | 5.40E-53  |
| S100A14    | 189.505  | 5.27    | 4.925  | 5.25E-83  |
| RP6-149D17 | 0        | 51.749  | -5.721 | 3.24E-26  |
| HMGB1      | 272.006  | 65.181  | 2.044  | 1.41E-85  |
| MMP23B     | 11.99    | 1.54    | 2.354  | 1.62E-67  |
| GJB4       | 4.01     | 0.01    | 2.31   | 5.70E-71  |
| IL1RAP     | 8.38     | 0.82    | 2.366  | 8.90E-81  |
| HLA-DRB1   | 290.178  | 10.67   | 4.641  | 9.21E-95  |
| SPATS2L    | 139.352  | 15.75   | 3.067  | 5.52E-103 |
| S100A4     | 313.038  | 17.6    | 4.078  | 3.24E-84  |
| TUBB       | 280.061  | 50.101  | 2.459  | 1.44E-86  |
| SFTA2      | 64.128   | 1.54    | 4.68   | 1.22E-76  |
| PPIA       | 1549.728 | 365.974 | 2.079  | 6.43E-72  |
| MYL6B      | 47.5     | 7.76    | 2.469  | 6.28E-105 |
| SPTSSB     | 5.07     | 0.22    | 2.315  | 1.87E-63  |
| SULF2      | 108.06   | 3.55    | 4.583  | 4.62E-124 |
| MMP1       | 59.999   | 0.15    | 5.729  | 2.98E-84  |
| HRH1       | 5.36     | 0.11    | 2.518  | 1.08E-115 |
| HSH2D      | 14.62    | 2.49    | 2.162  | 5.78E-73  |
| HLA-DQA1   | 57.281   | 1.41    | 4.596  | 1.85E-87  |
| GM2A       | 25.149   | 3.57    | 2.517  | 8.40E-105 |
| S100A2     | 27.469   | 0.59    | 4.162  | 1.03E-67  |

|          |          |         |       |           |
|----------|----------|---------|-------|-----------|
| LAMB3    | 172.278  | 1.13    | 6.346 | 4.50E-120 |
| PDLIM7   | 127.027  | 8.39    | 3.769 | 5.75E-96  |
| FLNA     | 518.176  | 66.509  | 2.943 | 4.85E-66  |
| FUT11    | 16.151   | 3.27    | 2.006 | 4.84E-94  |
| SERTAD1  | 19.821   | 2.14    | 2.729 | 1.78E-114 |
| GAL3ST4  | 6.36     | 0.44    | 2.354 | 1.13E-81  |
| HIST1H4J | 6.68     | 0.36    | 2.498 | 3.92E-87  |
| SERPINA1 | 830.593  | 42.511  | 4.256 | 9.96E-70  |
| TPSB2    | 36.64    | 5.56    | 2.521 | 4.30E-45  |
| PELI1    | 17.43    | 3.22    | 2.127 | 1.08E-79  |
| HNRNPAB  | 117.652  | 22.389  | 2.343 | 2.84E-106 |
| SPN      | 3.89     | 0.22    | 2.003 | 1.21E-67  |
| MFAP5    | 26.29    | 1.03    | 3.749 | 5.06E-73  |
| MPEG1    | 6.2      | 0.65    | 2.126 | 2.11E-54  |
| SERPINB2 | 4.15     | 0.21    | 2.09  | 5.48E-45  |
| SPTAN1   | 127.698  | 30.89   | 2.013 | 2.38E-76  |
| FAM114A1 | 27.46    | 5.87    | 2.051 | 7.18E-90  |
| RPE      | 20.4     | 4.15    | 2.055 | 7.22E-95  |
| PSAP     | 844.702  | 176.998 | 2.248 | 2.84E-76  |
| S100A10  | 1185.68  | 50.621  | 4.523 | 3.41E-120 |
| FAM118B  | 15.13    | 2.73    | 2.112 | 6.94E-114 |
| ERO1L    | 37.801   | 7.39    | 2.209 | 9.48E-76  |
| S100A6   | 5221.685 | 53.891  | 6.572 | 3.84E-142 |
| MPZL1    | 79.572   | 11.03   | 2.744 | 1.34E-106 |
| SIRPA    | 22.68    | 4.65    | 2.067 | 1.64E-56  |
| TOR4A    | 16.53    | 1.29    | 2.936 | 8.39E-100 |
| SOWAHC   | 6.73     | 0.9     | 2.024 | 3.08E-106 |
| TFDP1    | 35.439   | 7.63    | 2.078 | 3.61E-116 |
| UBL5     | 407.285  | 85.781  | 2.234 | 3.88E-94  |
| TXNRD1   | 31.349   | 5.47    | 2.322 | 5.56E-89  |
| TPM2     | 246.133  | 31.349  | 2.933 | 9.10E-73  |
| HLA-DRB5 | 62.391   | 1.19    | 4.855 | 5.58E-58  |
| ITGBL1   | 39.289   | 1.37    | 4.087 | 1.09E-84  |
| PPIAP22  | 196.678  | 17.74   | 3.399 | 6.87E-135 |
| FAM3D    | 26.65    | 0.23    | 4.491 | 2.60E-73  |
| GLMP     | 63       | 12.7    | 2.224 | 1.18E-103 |
| PPP1R14C | 5.85     | 0.19    | 2.525 | 1.75E-82  |
| F5       | 16.26    | 0.6     | 3.431 | 3.45E-70  |
| EPS8L3   | 56.621   | 0.31    | 5.459 | 1.66E-100 |
| RCSD1    | 5.01     | 0.5     | 2.002 | 2.30E-58  |
| TMEM184B | 37.08    | 8.48    | 2.006 | 3.73E-87  |
| PNP      | 64.431   | 7.43    | 2.956 | 6.70E-104 |
| GRK5     | 12.36    | 1.66    | 2.328 | 8.95E-96  |
| PRC1     | 17.259   | 3.52    | 2.014 | 1.62E-81  |
| NAGA     | 25.34    | 3.38    | 2.588 | 9.20E-121 |
| TGM2     | 151.271  | 8.62    | 3.984 | 6.46E-76  |
| INF2     | 89.927   | 12.8    | 2.72  | 1.76E-81  |

|            |          |           |        |           |
|------------|----------|-----------|--------|-----------|
| SERTAD4-AS | 4.97     | 0.29      | 2.21   | 9.74E-92  |
| FCGR3A     | 37.869   | 1.85      | 3.77   | 4.90E-75  |
| PPAPDC1A   | 9.34     | 0.04      | 3.314  | 1.93E-85  |
| HIST2H2AA3 | 39.73    | 5.57      | 2.632  | 3.28E-37  |
| RBM20      | 0.15     | 8.28      | -3.012 | 3.87E-86  |
| LIME1      | 20.26    | 3.07      | 2.385  | 8.46E-42  |
| FAM127B    | 71.57    | 16.76     | 2.031  | 4.38E-89  |
| MAFB       | 19.62    | 3.39      | 2.232  | 1.76E-50  |
| HLA-DOA    | 12.46    | 0.69      | 2.994  | 5.29E-74  |
| HNRNPCP2   | 10.09    | 0.51      | 2.877  | 4.30E-146 |
| HLA-DMA    | 106.838  | 9         | 3.431  | 2.33E-85  |
| PSMB8-AS1  | 21.98    | 2.58      | 2.682  | 3.57E-89  |
| PSMB8      | 116.848  | 11.38     | 3.251  | 6.35E-105 |
| TAP2       | 33.56    | 5.38      | 2.437  | 4.99E-84  |
| LINC01420  | 38.799   | 5.01      | 2.727  | 2.38E-131 |
| HLA-DRA    | 724.629  | 21.31     | 5.023  | 1.95E-100 |
| LAYN       | 9.31     | 0.73      | 2.575  | 5.63E-91  |
| SLC44A4    | 111.964  | 3.16      | 4.763  | 7.23E-102 |
| HSPA1B     | 118.036  | 21.31     | 2.416  | 9.20E-20  |
| HSPA1A     | 147.206  | 20.71     | 2.771  | 8.62E-26  |
| LST1       | 36.041   | 1.48      | 3.901  | 1.98E-92  |
| HLA-C      | 715.198  | 86.521    | 3.033  | 5.40E-88  |
| PSORS1C1   | 8.14     | 0.39      | 2.717  | 7.27E-71  |
| HLA-E      | 388.157  | 56.861    | 2.75   | 1.34E-88  |
| TRIM15     | 8.02     | 0.01      | 3.159  | 2.83E-91  |
| TRIM31     | 18.08    | 0.14      | 4.065  | 1.96E-83  |
| HLA-F      | 148.158  | 11.77     | 3.546  | 2.72E-95  |
| REG1P      | 0.22     | 140.789   | -6.861 | 1.03E-58  |
| MROH6      | 24.599   | 0.89      | 3.76   | 7.15E-99  |
| IGFL2      | 14.65    | 0         | 3.968  | 1.40E-75  |
| PRSS1      | 102.153  | 59372.201 | -9.169 | 5.13E-59  |
| PSENEN     | 123.647  | 25.24     | 2.248  | 1.71E-102 |
| MUC12      | 4.63     | 0.09      | 2.369  | 2.45E-92  |
| SARNP      | 67.751   | 15.6      | 2.05   | 7.24E-98  |
| PRR13      | 241.502  | 49.869    | 2.253  | 5.36E-89  |
| SAMD9      | 9.13     | 0.51      | 2.746  | 5.84E-103 |
| KRT6A      | 9.47     | 0.7       | 2.623  | 2.88E-32  |
| EXOC3L4    | 8.99     | 0.69      | 2.563  | 1.90E-58  |
| TMSB4X     | 5503.37  | 636.403   | 3.11   | 6.42E-84  |
| ITSN1      | 13.36    | 2.44      | 2.062  | 3.47E-81  |
| SERPINB5   | 19.7     | 0.06      | 4.287  | 4.13E-100 |
| HCP5       | 20.18    | 1.51      | 3.077  | 2.05E-93  |
| HLA-H      | 52.301   | 2.67      | 3.86   | 1.11E-105 |
| HLA-A      | 1174.555 | 61.311    | 4.238  | 5.41E-122 |
| STK38L     | 19.87    | 3.99      | 2.064  | 2.58E-75  |
| IGKC       | 2508.657 | 22.55     | 6.736  | 7.70E-76  |
| IGKV4-1    | 59.26    | 0.57      | 5.262  | 4.00E-70  |

|           |         |       |       |          |
|-----------|---------|-------|-------|----------|
| IGKV3D-20 | 3.69    | 0     | 2.23  | 3.68E-41 |
| IGLV4-69  | 7.16    | 0.08  | 2.918 | 2.20E-49 |
| IGLV8-61  | 6.73    | 0.16  | 2.736 | 4.77E-37 |
| IGLV6-57  | 7.65    | 0.07  | 3.015 | 8.57E-55 |
| IGLV1-51  | 28.829  | 0.88  | 3.988 | 3.17E-56 |
| IGLV1-47  | 23.831  | 0.25  | 4.312 | 5.04E-61 |
| IGLV7-46  | 8.02    | 0.17  | 2.947 | 4.63E-45 |
| IGLV1-44  | 30.589  | 0.28  | 4.625 | 1.57E-59 |
| IGLV7-43  | 5.44    | 0     | 2.687 | 3.71E-42 |
| IGLV1-40  | 58.141  | 0.54  | 5.263 | 6.23E-65 |
| IGLV3-25  | 24.38   | 0.18  | 4.427 | 3.16E-59 |
| IGLV2-23  | 39.821  | 0.35  | 4.918 | 4.14E-72 |
| IGLV3-21  | 13.9    | 0.13  | 3.721 | 2.63E-58 |
| IGLV3-19  | 23.4    | 0.23  | 4.31  | 9.30E-60 |
| IGLV2-14  | 75.441  | 1.35  | 5.024 | 3.65E-60 |
| IGLV2-11  | 33.091  | 0.61  | 4.404 | 4.12E-60 |
| IGLV3-10  | 7.24    | 0.14  | 2.854 | 2.53E-42 |
| IGLV3-1   | 29.549  | 0.19  | 4.682 | 1.57E-67 |
| IGLC1     | 323.113 | 3.55  | 6.155 | 3.41E-75 |
| IGLC2     | 812.373 | 7.85  | 6.522 | 6.09E-73 |
| IGLC3     | 361.762 | 3.9   | 6.21  | 7.06E-73 |
| IGLC7     | 4.67    | 0     | 2.503 | 1.00E-40 |
| TRBV25-1  | 14.41   | 0.51  | 3.351 | 3.93E-81 |
| TRBC2     | 43.299  | 1.17  | 4.352 | 1.62E-91 |
| IGHA2     | 160.986 | 3.6   | 5.138 | 5.97E-54 |
| IGHG4     | 112.789 | 0.2   | 6.567 | 8.46E-73 |
| IGHG2     | 167.741 | 1.17  | 6.281 | 2.51E-79 |
| IGHA1     | 797.919 | 13.96 | 5.739 | 2.78E-62 |
| IGHG1     | 886.329 | 3.9   | 7.501 | 2.11E-85 |
| IGHG3     | 85.537  | 0.39  | 5.96  | 2.16E-77 |
| IGHM      | 121.818 | 2.24  | 5.244 | 3.37E-65 |
| IGHV6-1   | 3.76    | 0     | 2.251 | 2.63E-45 |
| IGHV1-2   | 12.43   | 0.13  | 3.571 | 1.48E-46 |
| IGHV1-3   | 3.53    | 0     | 2.18  | 2.61E-27 |
| IGHV2-5   | 11.47   | 0.12  | 3.477 | 5.10E-54 |
| IGHV3-7   | 18.9    | 0.27  | 3.97  | 3.62E-54 |
| IGHV3-11  | 12.04   | 0.1   | 3.567 | 1.50E-53 |
| IGHV3-15  | 17.97   | 0.23  | 3.947 | 7.32E-58 |
| IGHV1-18  | 18.64   | 0.13  | 4.119 | 2.28E-59 |
| IGHV3-21  | 23.41   | 0.16  | 4.395 | 7.86E-68 |
| IGHV3-23  | 49.531  | 0.47  | 5.103 | 4.58E-59 |
| IGHV1-24  | 6.56    | 0     | 2.918 | 3.94E-48 |
| IGHV3-33  | 27.2    | 0.32  | 4.417 | 9.55E-59 |
| IGHV4-34  | 9.1     | 0.11  | 3.186 | 5.88E-49 |
| IGHV4-39  | 23.259  | 0.18  | 4.362 | 1.71E-60 |
| IGHV1-46  | 4.34    | 0.06  | 2.333 | 2.93E-46 |
| IGHV3-49  | 6.35    | 0.1   | 2.74  | 2.51E-47 |



|            |          |         |        |           |
|------------|----------|---------|--------|-----------|
| IGHV5-51   | 25.69    | 0.18    | 4.499  | 2.18E-66  |
| IGHV4-61   | 9.54     | 0.06    | 3.314  | 4.63E-54  |
| IGHV1-69   | 3.78     | 0       | 2.257  | 3.88E-34  |
| IGHV3-73   | 3.52     | 0       | 2.176  | 4.16E-40  |
| RP11-641DE | 290.037  | 59.141  | 2.275  | 2.05E-95  |
| LINC00671  | 0.23     | 11.69   | -3.367 | 2.98E-80  |
| PTPRCAP    | 7.15     | 0.89    | 2.108  | 1.06E-49  |
| HNRNPA1P3E | 5.8      | 0.06    | 2.681  | 8.61E-68  |
| SIPA1      | 46.278   | 7.84    | 2.419  | 6.34E-84  |
| VDAC1      | 177.896  | 34.75   | 2.323  | 9.50E-100 |
| LBH        | 62.232   | 3.78    | 3.726  | 8.29E-104 |
| PPP1CB     | 80.929   | 15.39   | 2.322  | 1.88E-87  |
| SULT1A4    | 15.5     | 1.8     | 2.559  | 4.95E-77  |
| GPSM3      | 31.18    | 2.14    | 3.357  | 1.95E-96  |
| UBD        | 108.563  | 3.69    | 4.546  | 3.94E-62  |
| ITGA1      | 14.26    | 1.55    | 2.581  | 1.80E-92  |
| TAX1BP3    | 162.286  | 28.479  | 2.47   | 4.57E-86  |
| UCA1       | 7.43     | 0.13    | 2.899  | 6.80E-53  |
| SH3D21     | 5.24     | 0.44    | 2.115  | 4.87E-71  |
| PLIN5      | 1.34     | 46.61   | -4.347 | 1.24E-125 |
| MEG3       | 29.65    | 149.758 | -2.298 | 4.47E-46  |
| MUC5AC     | 12.01    | 0.01    | 3.687  | 2.87E-50  |
| GOLGA8B    | 12.33    | 155.588 | -3.554 | 4.70E-103 |
| TMED11P    | 0.14     | 72.028  | -6.001 | 4.26E-92  |
| MMP23A     | 6.92     | 0.66    | 2.254  | 2.64E-61  |
| IFI30      | 235.583  | 20.069  | 3.489  | 3.53E-85  |
| FAM19A5    | 9.14     | 0.91    | 2.408  | 1.44E-80  |
| FTH1P8     | 10.26    | 1.13    | 2.402  | 1.81E-108 |
| RP11-40C6  | 611.453  | 0       | 9.258  | 3.08E-186 |
| TRIM16     | 26.6     | 3.02    | 2.779  | 6.86E-101 |
| LINC00152  | 63.438   | 4.8     | 3.474  | 2.72E-103 |
| RN7SKP54   | 7.71     | 0       | 3.123  | 7.79E-45  |
| RP11-289I1 | 6.67     | 0.67    | 2.199  | 5.78E-98  |
| HLA-DPB1   | 232.227  | 11.53   | 4.218  | 6.04E-97  |
| UBE2SP2    | 5.69     | 0       | 2.742  | 2.61E-142 |
| LINC01133  | 25.44    | 0.12    | 4.561  | 2.56E-89  |
| IGHV4-59   | 16.959   | 0.21    | 3.892  | 6.11E-60  |
| LINC01272  | 6.96     | 0.31    | 2.603  | 2.26E-75  |
| IGHV3-74   | 9.35     | 0.2     | 3.109  | 1.77E-51  |
| IGHV3-72   | 3.83     | 0.08    | 2.161  | 2.24E-40  |
| TMEM191A   | 7.95     | 1.1     | 2.091  | 6.86E-86  |
| FTH1P20    | 14.97    | 1.13    | 2.906  | 2.96E-119 |
| MIR217HG   | 0.03     | 5.74    | -2.71  | 1.31E-88  |
| LINC00511  | 23.98    | 2.39    | 2.881  | 2.59E-105 |
| RP11-395B7 | 6.06     | 0       | 2.82   | 6.45E-95  |
| RPS28P7    | 1046.748 | 244.45  | 2.094  | 2.03E-76  |
| LTB        | 17.3     | 0.63    | 3.489  | 3.75E-69  |

|            |          |          |        |           |
|------------|----------|----------|--------|-----------|
| FLJ38122   | 0.12     | 8.98     | -3.156 | 5.99E-114 |
| RP1-241P17 | 6.93     | 0.65     | 2.265  | 2.07E-39  |
| RP11-39201 | 0.08     | 4.72     | -2.405 | 7.94E-58  |
| PGA4       | 0.1      | 4.99     | -2.445 | 6.82E-27  |
| HMG1P37    | 3.89     | 0        | 2.29   | 2.54E-130 |
| HLA-DRB6   | 19.149   | 0.3      | 3.954  | 6.71E-96  |
| PGA3       | 0.14     | 6.84     | -2.782 | 1.75E-35  |
| TMSB4XP6   | 8.33     | 0        | 3.222  | 2.27E-06  |
| RP4-631H15 | 0        | 4.05     | -2.336 | 5.19E-26  |
| HSBP1      | 90.283   | 17.23    | 2.324  | 1.77E-111 |
| HLA-DPA1   | 192.898  | 8.45     | 4.359  | 4.48E-93  |
| IGHV4-31   | 4.45     | 0        | 2.446  | 3.66E-43  |
| TAPBP      | 96.348   | 17.31    | 2.411  | 1.05E-84  |
| FTH1P7     | 26.521   | 1.74     | 3.328  | 5.88E-136 |
| IGHV3-43   | 3.18     | 0        | 2.064  | 1.44E-41  |
| RP11-14N7  | 10.16    | 1.17     | 2.363  | 5.92E-73  |
| HLA-DQB2   | 8.11     | 0.14     | 2.998  | 3.39E-83  |
| SLC04A1-AS | 3.83     | 0.17     | 2.045  | 3.27E-56  |
| PHGR1      | 8.65     | 0.58     | 2.611  | 1.66E-37  |
| HOXB-AS3   | 5.19     | 0.32     | 2.229  | 3.83E-82  |
| GPX1       | 377.333  | 40.839   | 3.177  | 3.17E-103 |
| LINC01237  | 0.37     | 5.77     | -2.305 | 7.15E-96  |
| LINC01503  | 8.98     | 0.48     | 2.753  | 1.71E-82  |
| RP5-1108M1 | 0        | 11.78    | -3.676 | 2.00E-10  |
| RHOXF1P1   | 0.05     | 4.07     | -2.272 | 7.10E-114 |
| HLA-B      | 1432.579 | 99.85    | 3.829  | 2.95E-99  |
| H3F3AP4    | 245.52   | 44.47    | 2.439  | 1.08E-73  |
| HSPB1P1    | 6.12     | 0        | 2.832  | 5.45E-89  |
| TRHDE-AS1  | 0.32     | 4.79     | -2.133 | 3.53E-83  |
| RP11-175B9 | 2.25     | 12.26    | -2.029 | 3.59E-69  |
| NR2F1-AS1  | 9.24     | 1.09     | 2.293  | 5.37E-77  |
| UNC5B-AS1  | 3.5      | 0.11     | 2.019  | 3.25E-54  |
| LINC00857  | 3.86     | 0.13     | 2.105  | 6.58E-95  |
| HLA-DQA2   | 8.52     | 0.13     | 3.075  | 1.95E-58  |
| KIFC1      | 6.12     | 0.22     | 2.545  | 6.22E-107 |
| RP5-857K21 | 94.529   | 19.66    | 2.209  | 3.70E-39  |
| OR2I1P     | 8.74     | 0.71     | 2.51   | 8.17E-37  |
| IGKV1-6    | 7.4      | 0.12     | 2.907  | 6.65E-53  |
| IGKV3-20   | 183.915  | 1.36     | 6.292  | 9.27E-74  |
| PSMB9      | 81.718   | 4.03     | 4.04   | 3.02E-111 |
| PCDHGC3    | 44.68    | 10.29    | 2.017  | 3.43E-67  |
| RP11-331F4 | 1.47     | 3069.099 | -10.28 | 1.04E-112 |
| IGKV1-17   | 21.86    | 0.2      | 4.252  | 1.69E-59  |
| RP11-680B3 | 0.05     | 31.95    | -4.972 | 1.27E-107 |
| IGKV1-8    | 11.88    | 0        | 3.687  | 1.32E-51  |
| PNMA2      | 5.59     | 0.54     | 2.097  | 1.33E-65  |
| TMEM189    | 33.4     | 5.23     | 2.465  | 6.43E-111 |

|            |         |        |        |           |
|------------|---------|--------|--------|-----------|
| IGKV1-16   | 15.67   | 0.2    | 3.796  | 3.64E-57  |
| IGKV2-24   | 10.71   | 0.26   | 3.216  | 3.93E-47  |
| IGKV3-11   | 198.982 | 1.69   | 6.216  | 8.81E-78  |
| RPL37P6    | 3.29    | 0      | 2.101  | 3.68E-100 |
| PSMC1P1    | 20.99   | 3.26   | 2.368  | 7.66E-102 |
| IGKV1-9    | 21.24   | 0.17   | 4.249  | 6.46E-61  |
| PLEKH02    | 16.52   | 2.25   | 2.43   | 2.41E-86  |
| IGKV1-33   | 47.99   | 0.39   | 5.139  | 2.66E-65  |
| UGT1A10    | 17.09   | 0      | 4.177  | 1.45E-78  |
| IGKV2D-28  | 17.44   | 0      | 4.205  | 6.20E-52  |
| HLA-DMB    | 63.03   | 3.42   | 3.857  | 3.23E-89  |
| GNG10      | 48.271  | 6.84   | 2.652  | 2.12E-113 |
| IGKV2-30   | 7.54    | 0.16   | 2.88   | 5.42E-43  |
| IGKV2D-29  | 6.03    | 0      | 2.814  | 8.82E-40  |
| PRAF2      | 25.849  | 3.67   | 2.523  | 1.45E-99  |
| IGKV1-5    | 49.009  | 0.46   | 5.098  | 1.29E-69  |
| TNFRSF6B   | 27.72   | 1.12   | 3.76   | 1.17E-58  |
| RPLP0P2    | 3.86    | 0.1    | 2.143  | 1.22E-73  |
| GSTA2      | 1.15    | 66.541 | -4.973 | 8.49E-85  |
| IGKV2-28   | 69.709  | 0.8    | 5.296  | 2.50E-63  |
| IGKV3-15   | 54.651  | 0.44   | 5.272  | 6.57E-69  |
| RP11-1398F | 4.76    | 0.31   | 2.137  | 8.54E-99  |
| SCARF2     | 12.2    | 1.78   | 2.247  | 2.43E-63  |
| RP11-10G12 | 4.62    | 0      | 2.491  | 1.58E-124 |
| IGKV1-27   | 16.54   | 0.22   | 3.846  | 6.48E-51  |
| MIR210HG   | 12.79   | 1.74   | 2.331  | 1.12E-47  |
| TWF2       | 56.861  | 6.26   | 2.995  | 6.34E-113 |
| MTND4P12   | 17.1    | 0.18   | 3.939  | 9.09E-36  |
| PCED1B-AS1 | 13.41   | 1.15   | 2.745  | 9.70E-69  |
| ECSCR      | 13.9    | 2.18   | 2.228  | 3.20E-74  |
| PVT1       | 12.5    | 0.62   | 3.059  | 5.05E-64  |
| RP11-256P1 | 3.4     | 0      | 2.138  | 3.33E-36  |
| TMEM158    | 8.02    | 0.6    | 2.495  | 9.93E-78  |
| IQCJ-SCHIF | 8.1     | 0.52   | 2.582  | 7.47E-96  |
| PRSS3P1    | 0.04    | 15.6   | -3.997 | 1.13E-68  |
| RP11-834C1 | 11.99   | 1.41   | 2.43   | 1.61E-69  |
| IGKV1D-39  | 102.089 | 0.88   | 5.777  | 2.63E-69  |
| RNA5SP216  | 0       | 3.79   | -2.26  | 1.72E-15  |
| TRNP1      | 39.681  | 7.4    | 2.276  | 3.23E-63  |
| HOXA-AS2   | 7.35    | 0.74   | 2.263  | 4.66E-75  |
| IGHGP      | 16.45   | 0      | 4.125  | 2.02E-72  |
| LYN        | 19.49   | 3.37   | 2.229  | 9.06E-77  |
| RP11-719K4 | 17.23   | 0.78   | 3.356  | 1.40E-58  |
| RP11-468E2 | 12.57   | 0.29   | 3.395  | 1.19E-81  |
| IGLL5      | 34.071  | 0.37   | 4.678  | 7.03E-67  |
| RP11-805J1 | 11.44   | 1.06   | 2.594  | 1.89E-123 |
| SLC22A18A5 | 3.94    | 0.07   | 2.207  | 1.61E-90  |

|            |         |          |        |           |
|------------|---------|----------|--------|-----------|
| RP11-326C5 | 11.19   | 257.315  | -4.405 | 9.59E-70  |
| PIGY       | 13.18   | 0.2      | 3.563  | 6.49E-52  |
| RP11-350N1 | 0.42    | 5.95     | -2.291 | 5.71E-101 |
| RP4-809F18 | 0.17    | 4.35     | -2.193 | 9.14E-88  |
| TRAPPC2B   | 14.69   | 2.5      | 2.164  | 2.75E-115 |
| RP11-320N7 | 0.26    | 15.07    | -3.673 | 1.54E-66  |
| GALNT4     | 13.81   | 1.2      | 2.751  | 2.86E-77  |
| RP11-1100I | 17.72   | 3.47     | 2.066  | 1.65E-79  |
| RP11-1143C | 52.359  | 0.48     | 5.172  | 2.14E-50  |
| RP11-386G1 | 73.312  | 6.01     | 3.406  | 4.18E-33  |
| RP11-161H2 | 123.613 | 9.85     | 3.522  | 1.21E-100 |
| RP11-649E7 | 4.54    | 0.18     | 2.231  | 5.89E-38  |
| RP11-638I2 | 13.04   | 1.13     | 2.721  | 2.11E-74  |
| TUBB3      | 35.7    | 0.67     | 4.458  | 3.04E-112 |
| RP11-316M1 | 11.55   | 0.19     | 3.399  | 1.36E-61  |
| SORD2P     | 8.06    | 1.24     | 2.016  | 8.89E-74  |
| SLC22A31   | 0.25    | 4.73     | -2.197 | 1.70E-37  |
| RP11-1100I | 6.33    | 0.61     | 2.187  | 2.79E-29  |
| RP11-304L1 | 6.16    | 0.27     | 2.495  | 8.37E-76  |
| HOXB7      | 16.59   | 0.42     | 3.631  | 2.19E-109 |
| MRC1       | 8.56    | 0.98     | 2.272  | 3.56E-50  |
| RP11-211G2 | 3.09    | 0        | 2.032  | 1.88E-50  |
| WFDC21P    | 7.57    | 0.38     | 2.635  | 5.18E-71  |
| RP11-304L1 | 5.25    | 0.45     | 2.108  | 7.67E-67  |
| PECAM1     | 36.161  | 6.15     | 2.378  | 6.12E-69  |
| RP11-345J4 | 27.54   | 4.74     | 2.314  | 3.37E-109 |
| RP11-626G1 | 25.46   | 5.09     | 2.119  | 9.08E-77  |
| MIA        | 54.78   | 0.41     | 5.306  | 2.00E-88  |
| MMP12      | 5.57    | 0        | 2.716  | 1.50E-64  |
| RP11-667K1 | 5.65    | 0        | 2.733  | 3.02E-75  |
| SPON1      | 18.23   | 1.8      | 2.78   | 7.56E-64  |
| RP11-498C5 | 3.09    | 0        | 2.032  | 1.06E-26  |
| RP11-334E6 | 57.651  | 1.37     | 4.629  | 2.00E-102 |
| RP11-746M1 | 18.03   | 3.44     | 2.1    | 9.09E-27  |
| RP11-6N17  | 4.59    | 0.34     | 2.061  | 9.62E-45  |
| SNRPGP2    | 10.69   | 1.12     | 2.463  | 8.39E-95  |
| RBM8A      | 121.153 | 23.3     | 2.33   | 9.86E-103 |
| TIMM23     | 46.85   | 10.88    | 2.01   | 3.12E-113 |
| RP11-138I1 | 126.956 | 23.88    | 2.363  | 5.03E-88  |
| SRGAP2     | 16.04   | 3.2      | 2.02   | 5.65E-74  |
| PNLIPRP2   | 4.11    | 2034.698 | -8.638 | 2.15E-67  |
| GDF10      | 0.23    | 4.57     | -2.179 | 5.76E-102 |
| RP11-78A19 | 15.82   | 1.1      | 3.002  | 9.70E-94  |
| LUZP6      | 18.69   | 2.07     | 2.681  | 2.34E-33  |
| RP11-64C12 | 0.1     | 7.66     | -2.977 | 4.32E-131 |
| SMIM22     | 274.658 | 57.619   | 2.233  | 7.19E-60  |
| SLC6A14    | 11.3    | 0.01     | 3.606  | 1.23E-77  |

|            |         |           |        |           |
|------------|---------|-----------|--------|-----------|
| RP3-461F17 | 12.16   | 2.14      | 2.067  | 7.15E-105 |
| RP5-940J5  | 6.03    | 0         | 2.814  | 1.23E-31  |
| IGHV3-30   | 41.729  | 0.41      | 4.921  | 1.52E-62  |
| MMP28      | 36.269  | 0.58      | 4.56   | 1.43E-118 |
| LIX1L      | 13.03   | 2.07      | 2.192  | 5.63E-101 |
| MILR1      | 6.12    | 0.64      | 2.118  | 6.00E-66  |
| HIST2H2AA4 | 21.35   | 3.12      | 2.44   | 5.57E-27  |
| RP11-284F2 | 3.43    | 0.07      | 2.05   | 8.56E-67  |
| RP4-583P15 | 16.26   | 0.25      | 3.787  | 2.10E-106 |
| RP11-350J2 | 18.191  | 0         | 4.262  | 1.10E-94  |
| RN7SL386P  | 0       | 72.308    | -6.196 | 1.12E-128 |
| TP53TG1_1  | 4.52    | 0.29      | 2.097  | 5.37E-10  |
| IGHV2-70   | 3.31    | 0         | 2.108  | 5.30E-36  |
| SGK223     | 8.94    | 1.06      | 2.271  | 1.50E-84  |
| PRSS2      | 449.319 | 83831.219 | -7.54  | 1.84E-56  |
| UHRF1      | 4.56    | 0.12      | 2.312  | 1.08E-103 |
| ORAI1      | 18.21   | 3.64      | 2.05   | 2.82E-99  |
| TP53TG1_2  | 6.34    | 0.13      | 2.699  | 3.40E-22  |
| RAB7B      | 6.07    | 0.33      | 2.41   | 2.59E-88  |
| IGHV4-4    | 4.73    | 0         | 2.518  | 1.42E-32  |
| TRAC       | 23.33   | 0.82      | 3.741  | 1.01E-83  |
| PSMB3      | 190.229 | 31.299    | 2.566  | 3.48E-111 |
| RP11-452N1 | 44.359  | 4.92      | 2.938  | 4.14E-97  |
| RN7SL186P  | 0.11    | 153.234   | -7.118 | 3.82E-133 |
| IGLV2-8    | 20.33   | 0.45      | 3.879  | 4.25E-54  |
| RP4-738P15 | 11.86   | 0.72      | 2.902  | 2.23E-36  |
| RP11-671J1 | 29.829  | 4.72      | 2.43   | 2.01E-110 |
| IGHV1-69-2 | 21.63   | 0.13      | 4.324  | 1.85E-62  |
| U91328     | 3.78    | 0         | 2.257  | 6.13E-21  |
| TGFB2-OT1  | 5.4     | 0.59      | 2.009  | 1.99E-49  |
| TMEM265    | 42.461  | 3.48      | 3.278  | 1.83E-94  |
| TMBIM4     | 0       | 5.14      | -2.618 | 6.12E-14  |
